# Supplementary material for: Using machine learning techniques to develop forecasting algorithms for postoperative complications: protocol for a retrospective study
Source: PubMed Central journal article supplement — BMJ Open. 2018 Apr 10;8(4):e020124. doi: 10.1136/bmjopen-2017-020124 (PMC5898287; doi:10.1136/bmjopen-2017-020124), 2018-04-10
Supplement: bmjopen-2017-020124.draft_revisions.pdf [file bmjopen-2017-020124.draft_revisions.pdf]

# BMJ Open

BMJ Open is committed to open peer review. As part of this commitment we make the peer review history of every article we publish publicly available.

When an article is published we post the peer reviewers' comments and the authors' responses online. We also post the versions of the paper that were used during peer review. These are the versions that the peer review comments apply to.

The versions of the paper that follow are the versions that were submitted during the peer review process. They are not the versions of record or the final published versions. They should not be cited or distributed as the published version of this manuscript.

BMJ Open is an open access journal and the full, final, typeset and author-corrected version of record of the manuscript is available on our site with no access controls, subscription charges or pay-per-view fees (<http://bmjopen.bmj.com>).

If you have any questions on BMJ Open's open peer review process please email [info.bmjopen@bmj.com](mailto:info.bmjopen@bmj.com)

# BMJ Open

## Protocol for the Anesthesiology Control Tower: Forecasting Algorithms to Support Treatments (ACTFAST 2) Trial

|                                                                                                                                                                                                                                                                                                                                                               |                                                                                                                                                                                                                                                                                                                                                                                                                                                                                                                                                                                                                                                                                                                                                                                                                                                                                                                                                                                                                                                                                               |
|---------------------------------------------------------------------------------------------------------------------------------------------------------------------------------------------------------------------------------------------------------------------------------------------------------------------------------------------------------------|-----------------------------------------------------------------------------------------------------------------------------------------------------------------------------------------------------------------------------------------------------------------------------------------------------------------------------------------------------------------------------------------------------------------------------------------------------------------------------------------------------------------------------------------------------------------------------------------------------------------------------------------------------------------------------------------------------------------------------------------------------------------------------------------------------------------------------------------------------------------------------------------------------------------------------------------------------------------------------------------------------------------------------------------------------------------------------------------------|
| Journal:                                                                                                                                                                                                                                                                                                                                                      | <i>BMJ Open</i>                                                                                                                                                                                                                                                                                                                                                                                                                                                                                                                                                                                                                                                                                                                                                                                                                                                                                                                                                                                                                                                                               |
| Manuscript ID                                                                                                                                                                                                                                                                                                                                                 | bmjopen-2017-020124                                                                                                                                                                                                                                                                                                                                                                                                                                                                                                                                                                                                                                                                                                                                                                                                                                                                                                                                                                                                                                                                           |
| Article Type:                                                                                                                                                                                                                                                                                                                                                 | Protocol                                                                                                                                                                                                                                                                                                                                                                                                                                                                                                                                                                                                                                                                                                                                                                                                                                                                                                                                                                                                                                                                                      |
| Date Submitted by the Author:                                                                                                                                                                                                                                                                                                                                 | 17-Oct-2017                                                                                                                                                                                                                                                                                                                                                                                                                                                                                                                                                                                                                                                                                                                                                                                                                                                                                                                                                                                                                                                                                   |
| Complete List of Authors:                                                                                                                                                                                                                                                                                                                                     | Fritz, Bradley; Washington University School of Medicine in St. Louis, Anesthesiology<br>Chen, Yixin; Washington University in Saint Louis, Computer Science and Engineering<br>Murray-Torres, Teresa; Washington University School of Medicine in St. Louis, Anesthesiology<br>Gregory, SH; Washington University School of Medicine in St. Louis, Anesthesiology<br>Ben Abdallah, Arbi; Washington University School of Medicine in St. Louis, Anesthesiology<br>Kronzer, Alex; Washington University School of Medicine in St. Louis, Anesthesiology<br>McKinnon, Sherry; Washington University School of Medicine, Anesthesiology<br>Budelier, Thaddeus; Washington University School of Medicine in St. Louis, Anesthesiology<br>Helsten, Daniel; Washington University School of Medicine in St. Louis, Anesthesiology<br>Wildes, Troy; Washington University in Saint Louis School of Medicine, Anesthesiology<br>Sharma, Anshuman; Washington University School of Medicine in St. Louis, Anesthesiology<br>Avidan, Michael; Washington University School of Medicine, Anesthesiology |
| Keywords:                                                                                                                                                                                                                                                                                                                                                     | Adult anaesthesia < ANAESTHETICS, Information technology < BIOTECHNOLOGY & BIOINFORMATICS, Health informatics < BIOTECHNOLOGY & BIOINFORMATICS                                                                                                                                                                                                                                                                                                                                                                                                                                                                                                                                                                                                                                                                                                                                                                                                                                                                                                                                                |
| <p>Note: The following files were submitted by the author for peer review, but cannot be converted to PDF. You must view these files (e.g. movies) online.</p> <p>Data Dictionary v4 Tab1 - Preop.xls<br/>Data Dictionary v4 Tab2 - Intraop.xls<br/>Data Dictionary v4 Tab3 - SATISFY-SOS Outcomes.xls<br/>Data Dictionary v4 Tab4 - Sunrise Outcomes.xls</p> |                                                                                                                                                                                                                                                                                                                                                                                                                                                                                                                                                                                                                                                                                                                                                                                                                                                                                                                                                                                                                                                                                               |

1  
2  
3  
4  
5  
6  
7  
8  
9  
10  
11  
12  
13  
14  
15  
16  
17  
18  
19  
20  
21  
22  
23  
24  
25  
26  
27  
28  
29  
30  
31  
32  
33  
34  
35  
36  
37  
38  
39  
40  
41  
42  
43  
44  
45  
46  
47  
48  
49  
50  
51  
52  
53  
54  
55  
56  
57  
58  
59  
60

SCHOLARONE™  
Manuscripts

For peer review only

1  
2  
3 **Protocol for the Anesthesiology Control Tower: Forecasting Algorithms to Support Treatments**  
4  
5 **(ACTFAST 2) Trial**  
6  
7  
8  
9

10  
11 Bradley A Fritz, MD, Resident Physician<sup>1</sup>  
12

13  
14 Yixin Chen, PhD, Professor<sup>2</sup>  
15

16  
17 Teresa M Murray-Torres, MD, Resident Physician<sup>1</sup>  
18

19  
20 Stephen Gregory, MD, Instructor<sup>1</sup>  
21

22  
23 Arbi Ben Abdallah, PhD, Assistant Professor<sup>1</sup>  
24

25  
26 Alex Kronzer, Database Analyst<sup>1</sup>  
27

28  
29 Sherry McKinnon, Project Manager<sup>1</sup>  
30

31  
32 Thaddeus Budelier, Research Coordinator<sup>1</sup>  
33

34  
35 Daniel L Helsten, MD, Associate Professor<sup>1</sup>  
36

37  
38 Troy S Wildes, MD, Associate Professor<sup>1</sup>  
39

40  
41 Anshuman Sharma, MD, Professor<sup>1</sup>  
42

43  
44 Michael S Avidan, MBBCh, Professor<sup>1</sup>  
45  
46  
47  
48  
49  
50

51 1 – Department of Anesthesiology, Washington University in St. Louis, St. Louis, MO, USA  
52  
53  
54  
55  
56  
57  
58  
59  
60

1  
2  
3  
4  
5  
6  
7  
8  
9  
10  
11  
12  
13  
14  
15  
16  
17  
18  
19  
20  
21  
22  
23  
24  
25  
26  
27  
28  
29  
30  
31  
32  
33  
34  
35  
36  
37  
38  
39  
40  
41  
42  
43  
44  
45  
46  
47  
48  
49  
50  
51  
52  
53  
54  
55  
56  
57  
58  
59  
60

2 – Department of Computer Science and Engineering, Washington University in St. Louis, St. Louis, MO,

USA

Corresponding Author: Bradley Fritz

1 Barnes Jewish Hospital Plaza

St. Louis, MO, 63108

(314) 747-4155

bafriz@wustl.edu

For peer review only

## ABSTRACT

**Introduction** – Mortality and morbidity following surgery are pressing public health concerns in the United States. Traditional prediction models for postoperative adverse outcomes demonstrate good discrimination at the population level, but the ability to forecast an individual patient's trajectory in real time remains poor. We propose to apply machine-learning techniques to perioperative time-series data to develop algorithms for predicting adverse perioperative outcomes.

**Methods and Analysis** – This study will include all adult patients who had surgery at our tertiary care hospital over a four-year period. Patient history, laboratory values, minute-by-minute intraoperative vital signs, and medications administered will be extracted from the electronic medical record. Outcomes will include in-hospital mortality, postoperative acute kidney injury, and postoperative respiratory failure. Forecasting algorithms for each of these outcomes will be constructed using density-based logistic regression after employing a Nadaraya-Watson kernel density estimator. Time-series variables will be analyzed using first- and second-order feature extraction, shapelet methods, and convolutional neural networks. The algorithms will be validated using bootstrap methods.

**Ethics and Dissemination** – The successful development of these forecasting algorithms will allow perioperative health care clinicians to predict more accurately an individual patient's risk for specific adverse perioperative outcomes in real time. Knowledge of a patient's dynamic risk profile may allow clinicians to make targeted changes in the care plan that will alter the patient's outcome trajectory. This hypothesis will be tested in a future randomized controlled trial.

### STRENGTHS AND LIMITATIONS OF THIS STUDY

- Will utilize modeling techniques that take advantage of the rich time-series data that are available, rather than data from a single time point
- Will utilize efficient modeling techniques that can process large amounts of data quickly
- Will utilize group-based learning to increase model accuracy by separating groups of patients who likely have different relationship between underlying features and predicted outcomes
- Dissemination to other health care facilities may be limited by the availability of high-quality preoperative and intraoperative input data in a usable format

## INTRODUCTION

An estimated 40 million people undergo surgery every year in the United States. Postoperative mortality rate at one year for surgical inpatients is between 5 and 10 percent,<sup>1,2</sup> and an estimated 10 percent of surgical patients suffer major in-hospital morbidity.<sup>3-8</sup> Perioperative morbidity and mortality are therefore pressing public health concerns. Many patient characteristics, including comorbid medical conditions, associate strongly and independently with perioperative mortality and major morbidity.<sup>1,2,9-11</sup> While many of these characteristics are not modifiable, some perioperative risk factors, such as intraoperative blood pressures and anesthetic concentrations,<sup>1,2,9,10</sup> can be modified in real time. Although the association between perioperative variables and postoperative outcomes has been well established at the population level using approaches such as standard logistic regression,<sup>1,2,9,10,12</sup> the ability to utilize deviations in physiological parameters in real time to dynamically forecast the trajectory of each individual patient remains poor.

There is a gap in the field with an opportunity to assess the potential utility of machine learning-based forecasting algorithms to anticipate adverse perioperative outcomes, guide interventions, and improve overall quality of care. Standard forecasting models, such as logistic regression, linear regression, and other statistical modeling procedures, have long been used to identify and prioritize risk factors for adverse outcomes. Although most of these statistical techniques have been shown to have moderate predictive values, they are limited in their prognostic ability and practical use.<sup>1,2,6,9,10</sup> In contrast to standard forecasting models, we have demonstrated machine learning and data mining approaches for patients on intensive care units that generate markedly superior prediction for outcomes such as mortality.<sup>13</sup> Our methods differ from standard statistical techniques in their ability to effectively incorporate time-series data. Most standard modeling techniques for surgical patients are based on a snapshot scheme, which only considers the data values at a given moment. They are not competent in



1  
2  
3 extracting features from time-series data, especially in real-time fashion, such as temporal trends and  
4  
5 shapes. Therefore, the objective of this study is to utilize machine-learning techniques to build  
6  
7 forecasting algorithms that use patient characteristics and high-fidelity intraoperative time-series data  
8  
9  
10 to predict adverse perioperative outcomes.  
11  
12  
13  
14  
15  
16  
17  
18  
19  
20  
21  
22  
23  
24  
25  
26  
27  
28  
29  
30  
31  
32  
33  
34  
35  
36  
37  
38  
39  
40  
41  
42  
43  
44  
45  
46  
47  
48  
49  
50  
51  
52  
53  
54  
55  
56  
57  
58  
59  
60

## METHODS AND ANALYSIS

### *Study Design*

Our central hypothesis is that with sufficient knowledge of patient characteristics coupled with repeated, high-fidelity time series data from the perioperative electronic medical record, advanced models can be constructed for individual patients that will forecast adverse perioperative outcomes. To test this hypothesis, we will conduct an observational cohort study of adult patients who undergo surgery at Barnes-Jewish Hospital in St. Louis, Missouri. First, we plan to develop forecasting algorithms for specific adverse perioperative outcomes using historical data. Next, we plan to validate these algorithms by determining whether they can be used to reliably forecast individual adverse perioperative outcomes.

### *Patient Population and Sample Size*

This study will include all adult patients who had surgery in the 48 operating rooms at Barnes-Jewish Hospital in St. Louis, Missouri between June 1, 2012 and August 31, 2016. Patients who receive anesthesia care in areas outside the main operating rooms, such as the obstetric suite or the outpatient surgery suite, will not be included. Barnes-Jewish Hospital is a 1,252-bed academic university-affiliated adult tertiary care hospital, performing approximately 19,000 surgeries a year. On average, 125 surgeries take place in these operating rooms every business day. To be conservative, we estimate that information on 50 to 100 surgeries per day will be available for analysis. We therefore anticipate a minimum total sample size of 50,000 to 100,000 surgeries for algorithm development and validation.

The Human Research Protection Office at Washington University in St. Louis has granted a waiver of informed consent for all subjects enrolled in this study. This study has been determined to involve no more than minimal risk to participants, as no additional data will be collected beyond that

1  
2  
3 already contained in the electronic record. For the same reason, the waiver of consent will not adversely  
4 affect the participants' rights and welfare. It is impracticable to conduct this research without a waiver  
5 of consent because 100% participation from the patients is imperative to obtain scientifically sound  
6 data.  
7  
8  
9  
10  
11  
12

### 13 ***Data Acquisition***

14  
15  
16 For this project, we will use high-dimensional and complex data from a variety of electronic  
17 medical record sources to cover the entire perioperative period. Much of the relevant information will  
18 be imported from MetaVision®(iMDsoft, Wakefield, MA), an anesthesiology information management  
19 software system that is the perioperative electronic clinical documentation system currently utilized by  
20 the Department of Anesthesiology. MetaVision® captures comprehensive clinical data beginning with  
21 the preoperative assessment and continuing throughout the duration of the perioperative period.  
22 Information captured preoperatively includes patients' past medical and surgical histories, chronic  
23 medical issues, medications used, and functional capacity. Intraoperatively, minute-by-minute vital signs  
24 are captured, in addition to fluid balances, ventilator parameters, and anesthetic medications  
25 administered. All data fields are alphanumeric and are captured in a uniform and granular manner  
26 allowing for easy coding and data analysis. Reports from MetaVision® are commonly used to support  
27 many patient safety and quality improvement initiatives in addition to numerous research studies.  
28  
29  
30  
31  
32  
33  
34  
35  
36  
37  
38  
39  
40  
41  
42  
43

44 Postoperative outcome data will be obtained from Sunrise Clinical Manager (Allscripts, Chicago,  
45 IL), the electronic medical record currently used for inpatient care at Barnes-Jewish Hospital. Data will  
46 also be obtained from several registries, including the Systematic Assessment and Targeted  
47 Improvement of Services Following Yearlong Surgical Outcomes Surveys (SATISFY-SOS) patient-reported  
48 outcomes registry (NCT02032030), the National Surgical Quality Improvement Program (NSQIP)  
49 database, the Society of Thoracic Surgeons (STS) database. Preoperative and postoperative laboratory  
50  
51  
52  
53  
54  
55  
56  
57  
58  
59  
60

1  
2  
3 values will be obtained from the Center for Biomedical Informatics at Washington University, which  
4 hosts the data repository where these data are stored once they are processed by the laboratory. A  
5 data dictionary has been included as an online appendix detailing all the data elements that will be  
6  
7  
8  
9  
10 captured for this study.

11  
12  
13 The specific outcomes that will be predicted by the forecasting algorithms will include in-  
14 hospital mortality, postoperative acute kidney injury, and postoperative respiratory failure. In-hospital  
15 mortality will be ascertained from Sunrise Clinical Manager. Postoperative acute renal failure will be  
16 defined according to the KDIGO criteria<sup>14</sup>: an increase in serum creatinine of 0.3 mg/dL, increase in  
17 serum creatinine to 1.5 times the baseline value, or initiation of renal replacement therapy within 48  
18 hours of surgery end time. Patients receiving renal replacement therapy prior to surgery, patients with  
19 no baseline creatinine available within 30 days prior to surgery, and patients undergoing kidney  
20 transplant or dialysis access procedures will be excluded from analysis of this outcome. Postoperative  
21 respiratory failure will be defined as mechanical ventilation for greater than 48 hours or unplanned  
22 postoperative intubation within 48 hours. These events will be extracted from clinical documentation  
23 recorded by respiratory therapists in Sunrise Clinical Manager.

### 34 35 36 37 38 **Data Analysis, Part 1 – Forecasting Algorithm Development**

39  
40  
41 We will develop hybrid learning techniques to combine the strength of nonparametric  
42 (generative) models such as histogram and kernel density estimation and parametric (discriminative)  
43 models such as support vector machines, logistic regressions, and kernel machines to improve  
44 predictions of adverse perioperative outcomes (in-hospital mortality, postoperative acute renal failure,  
45 postoperative respiratory failure). The goal is to deliver superior prediction quality with good  
46 interpretability and high computational efficiency that supports fast processing of big data. Based on  
47 our preliminary work using density-based logistic regression (DLR) to develop an early clinical  
48  
49  
50  
51  
52  
53  
54  
55  
56  
57  
58  
59  
60

1  
2  
3 deterioration warning system for patients in the general wards of Barnes-Jewish Hospital,<sup>15 16</sup> we  
4 propose to develop novel hybrid data mining/machine learning algorithms that exploit both non-  
5 parametric and parametric techniques. Also, the resulting algorithms can be viewed as hybrid  
6  
7  
8 generative/discriminative learning models.  
9  
10

11  
12  
13 DLR is a hybrid algorithm combining the distribution-free nonlinear separation ability of non-  
14 parametric (generative) models and the efficiency and interpretability of parametric (discriminative)  
15 models. It first applies a Nadaraya-Watson kernel density estimator, a non-parametric transformation,  
16 on the input data to extract features that conform best to the true distribution of data, and then applies  
17 the parametric logistic regression model on the transformed features. The resulting model exhibits five  
18 desirable properties: nonlinear separation ability, high efficiency, good interpretability, ability to handle  
19 mixed data types including numerical and categorical ones, and support for multi-way classification. Our  
20 previous results using Barnes-Jewish Hospital clinical data showed that DLR achieves better classification  
21 accuracy than state-of-the-art nonlinear classifiers such as support vector machines and KLR but is also  
22 much more efficient than nonlinear models.<sup>17</sup> In fact, DLR has the same asymptotic complexity as linear  
23 classifiers and can scale up to very large datasets in practice.<sup>17</sup>  
24  
25  
26  
27  
28  
29  
30  
31  
32  
33  
34  
35  
36  
37

38 To analyze the collected time-series data, we need to extract features that capture temporal  
39 patterns, such as a rapid temperature increases or abnormal heart rate fluctuations. We will first  
40 extract a large pool of time-series features including: first-order features such as variance, skewness,  
41 and kurtosis, and second-order features such as energy, entropy, correlation, inertia, and local  
42 homogeneity.<sup>18 19</sup> The second-order features are known to be robust under noises.<sup>20 21</sup> Self-similarity is  
43 widely observed in human physiological signs. Detrended fluctuation analysis<sup>22</sup> measures the degree of  
44 self-similarity in time series and has been applied to analyze heartbeat and oxygen levels.<sup>23</sup>  
45 Approximate entropy measures the degree of unpredictability in a time series.<sup>24</sup> Spectral analysis has  
46  
47  
48  
49  
50  
51  
52  
53  
54  
55  
56  
57  
58  
59  
60

1  
2  
3 also been used to analyze clinical time-series.<sup>22</sup> We will also consider cross-sign features including  
4 correlation,<sup>25</sup> coherence,<sup>25</sup> lagged regression, nonlinear regression,<sup>19</sup> and the synchronization index.<sup>26</sup>  
5  
6 We will also extract features based on the bag-of-patterns approach<sup>27-29</sup> and autocorrelation.<sup>30-32</sup> In  
7  
8 addition, we will also generate features based on shapelets.<sup>33</sup> A shapelet is a subseries that is used to  
9  
10 compare against each time-series. For a shapelet with length  $l$  and a time series  $T$ , the shapelet gives a  
11  
12 feature value which is the minimum Euclidean distance between the shapelet and any subseries of  $T$   
13  
14 with length  $l$ . Efficient methods have been developed to find good shapelets, based on length estimation  
15  
16 and optimized search.<sup>34-36</sup>

17  
18  
19  
20  
21  
22 We will also develop a novel deep learning method to extract more robust features from time-  
23  
24 series. A leading method for feature selection from time series has been the shapelet method. However,  
25  
26 we have shown that deep learning methods can significantly improve over shapelet. Deep learning  
27  
28 methods, especially those using convolutional neural networks (CNNs),<sup>37</sup> have achieved great success in  
29  
30 learning useful representations (features) from images.<sup>38,39</sup> However, its uses in time-series  
31  
32 classification are very limited. We plan to apply CNNs to time-series data to generate good  
33  
34 representations. We note that the convolutional layers in CNNs can be viewed as a collection of local  
35  
36 filters over the input space; the filters' weights are learnt through back propagation. The filters in CNNs  
37  
38 regulate the time series in different frequency bands, and the dot product operations in the CNNs  
39  
40 measure distances between two subseries. Thus, CNNs can be viewed as a more general framework  
41  
42 than shapelet learning which can adaptively find the suitable down-sampling rates and scales of the  
43  
44 shapelets.  
45  
46  
47

48  
49 Our preliminary work has shown that it is beneficial to use a large feature set: the modeling  
50  
51 accuracy increases as more features are used and the top features in the final model include features  
52  
53 from different categories.<sup>23</sup> With the above features, we will address overfitting. An overfit model will  
54  
55  
56  
57  
58  
59  
60

1  
2  
3 generally have poor predictive performance and interpretability. We will investigate three schemes to  
4 avoid over-fitting including: 1) using feature selection methods, such as forward feature selection based  
5 on F-score or area-under-curve score,<sup>40</sup> to find the most discriminative features; 2) adding regularization  
6 terms (such as L1,<sup>41</sup> L2,<sup>42</sup> Akaike information criterion, Bayesian information criterion,<sup>43</sup> minimum  
7 description length,<sup>44</sup> or a probabilistic prior) to the optimization objective; and 3) using meta-techniques  
8 such as bootstrap aggregation<sup>45</sup> and exploratory undersampling<sup>46</sup> to further address overfitting and  
9 class imbalance.  
10  
11  
12  
13  
14  
15  
16  
17  
18  
19

20 We plan to develop novel classification algorithms that best fit our data. In our preliminary  
21 work, we proposed DLR, a novel nonlinear hybrid classification algorithm that integrates kernel density  
22 estimation with logistic regression. DLR can achieve nonlinear separability by utilizing a nonlinear  
23 feature transformation, but is much more efficient than other nonlinear models since it fits a linear  
24 model. It can naturally handle mixed data types. It also offers good interpretability. In this task, we  
25 plan to develop more powerful algorithms on top of DLR.  
26  
27  
28  
29  
30  
31  
32  
33

34 A key area of improvement is feature transformation. In DLR, we use the Nadaraya-Watson  
35 kernel density estimator for each data point in each dimension, which has time complexity of  $O(mN^2)$   
36 where  $m$  is the number of dimensions and  $N$  is the number of data points. Therefore, it is still slow for  
37 big datasets with a large  $N$ . We propose to use bin-based kernel density estimation, another non-  
38 parametric technique, to process the input features in each dimension. The idea is to divide each  
39 dimension into equal-sized bins and estimate the density for each bin instead of each data point. This  
40 will reduce the time into  $O(mB^2)$  where  $B \ll N$  is the number of bins. Note that instead of using a simple  
41 histogram count for each bin, we will use a Gaussian kernel function to smooth the density estimation  
42 across bins. The time complexity can be further reduced to  $O(mB)$  using techniques such as Gauss  
43 transformation.<sup>47</sup> Such dramatic reduction of computing time will enable us to process large datasets  
44  
45  
46  
47  
48  
49  
50  
51  
52  
53  
54  
55  
56  
57  
58  
59  
60

1  
2  
3 and perform quick model-building. We will also combine the kernel density estimator-based features  
4  
5 with other parametric models such as Cox regression.  
6  
7

8           We will also develop efficient training algorithms. We will leverage a hierarchical optimization  
9  
10 algorithm for training DLR,<sup>17</sup> which automatically learns free parameters in the model under a maximum  
11  
12 likelihood framework. This optimization formulation not only learns the coefficients in the model, but  
13  
14 also provides a way to automatically select the kernel bandwidth in the Nadaraya-Watson estimator or  
15  
16 the bin size in the bin-based kernel density estimation, which is absent in previous work. We will also  
17  
18 employ techniques including stochastic gradient descent<sup>48</sup> and its parallelized implementation<sup>49</sup> to  
19  
20 further enhance the scalability of the training algorithm.  
21  
22  
23  
24

25           We will study another novel approach called group-based modeling. The idea is to first use a  
26  
27 few key features to divide the patients into some major categories, and then train a separate classifier  
28  
29 for each category. The intuition is that from clinical knowledge, we know that some different groups of  
30  
31 patients have drastically different behaviors and should correspond to different statistical models.  
32  
33 Mixing such vastly different groups together to train a single model may not give the best result.  
34  
35 Therefore, it is instrumental to identify important sub-populations of patients, before we use  
36  
37 sophisticated hybrid algorithms to accurately model the patients in each group. For a simple example,  
38  
39 we can group the patients into a few age ranges, e.g., <45, 45-55, 56-65, etc. Although age can be used  
40  
41 as a feature in a single classifier for all patients, such explicit division leads to multiple, more specific  
42  
43 classifiers. It can be viewed as a hybrid algorithm combining a decision tree with other classifiers. We  
44  
45 may also use metrics defined on multiple attributes to group the patients. Features that will be used as  
46  
47 classifiers will include age, sex, and surgery type (cardiac versus non-cardiac). To systematically  
48  
49 integrate such clinical knowledge into modeling, we plan to study hybrid models that are mixture of two  
50  
51 or more classifiers. For example, we can construct a global decision tree whose nodes denote patient  
52  
53  
54  
55  
56  
57  
58  
59  
60



1  
2  
3 groups, where each group is modeled by a local classifier such as DLR. Different nodes may use different  
4  
5 types of classifiers. Previous work on a similar idea has demonstrated improved performance<sup>50</sup> in an  
6  
7 intensive care prognosis application.  
8  
9

### 10 ***Data Analysis, Part 2 – Forecasting Algorithm Validation***

11  
12  
13  
14 After algorithm development, the forecasting algorithms will be tested for accuracy of their  
15  
16 predictive performances in two ways. First, algorithm validity will be tested within the training database  
17  
18 using the bootstrap method. Second, the performance of the developed algorithms will be additionally  
19  
20 validated prospectively (out-of-sample performance), using standard measures of model predictive  
21  
22 accuracy, including measures of accuracy, precision and robustness.  
23  
24  
25

26 The performance of any predictive modeling process is always evaluated by the accuracy of its  
27  
28 predictions. Data mining techniques are used specifically to explain as well as forecast events. Their  
29  
30 predictive accuracy needs therefore to be evaluated before they can be deployed and used for clinical  
31  
32 decision-making. The proposed hybrid approach will be first tested using the bootstrap method.  
33  
34  
35

36 In the bootstrap method, a large number of independent random samples are drawn with replacement  
37  
38 from the entire database. These surrogate data sets are then used iteratively as the training sets for the  
39  
40 development of the machine-learning algorithm, and the remaining data from the original sample are  
41  
42 used for testing. The overall mean-squared prediction error and its variation is then used as an  
43  
44 evaluation and test tools of stability of the algorithm development process.<sup>51</sup> We propose to draw 100  
45  
46 surrogate samples for this evaluation.  
47  
48  
49

50 Additionally, we propose to perform a validation test of the predictive performance of the  
51  
52 developed algorithms prospectively, using patient records that did not belong to the learning database.  
53  
54 For this evaluation, we will apply the most commonly used criteria for predictive model performance,  
55  
56  
57  
58  
59  
60

including accuracy (defined as the overall percentage of correct forecasts), precision (defined as the percentage of correctly forecasted events), and robustness (defined as predictive ability when data includes noise and missing values).

### ***Prespecified Secondary Analyses***

In addition to the primary algorithms described above (in-hospital mortality, postoperative acute kidney injury, and postoperative respiratory failure), we anticipate using the acquired data to develop prediction algorithms for additional outcomes. These outcomes are outlined in Table 1.

**Table 1. Prespecified Secondary Outcomes**

| Data Source                                                    | Outcome                                                                                                                                                                                                                                                                                                                                                                                                                                                        |
|----------------------------------------------------------------|----------------------------------------------------------------------------------------------------------------------------------------------------------------------------------------------------------------------------------------------------------------------------------------------------------------------------------------------------------------------------------------------------------------------------------------------------------------|
| Sunrise Clinical Manager                                       | <ul style="list-style-type: none"> <li>- Thirty-day hospital readmission</li> <li>- Intensive care unit admission</li> <li>- Postoperative delirium</li> </ul>                                                                                                                                                                                                                                                                                                 |
| National Surgical Quality Improvement Program (NSQIP) database | <ul style="list-style-type: none"> <li>- Thirty-day mortality</li> <li>- Thirty-day hospital readmission</li> <li>- Unplanned intubation</li> <li>- Postoperative sepsis</li> <li>- Postoperative myocardial infarction</li> <li>- Postoperative cerebrovascular accident</li> <li>- Postoperative pulmonary embolism</li> <li>- Postoperative deep vein thrombosis</li> <li>- Postoperative cardiac arrest requiring cardiopulmonary resuscitation</li> </ul> |

|                                                                                                                                                                                                                                                                                                                                                                                                                                                                                                            |                                                                                                                                                                                                                                                                                                                                                                                                                                                                                                                                                                                                                                                                                                                                                                                                                                                                                                        |
|------------------------------------------------------------------------------------------------------------------------------------------------------------------------------------------------------------------------------------------------------------------------------------------------------------------------------------------------------------------------------------------------------------------------------------------------------------------------------------------------------------|--------------------------------------------------------------------------------------------------------------------------------------------------------------------------------------------------------------------------------------------------------------------------------------------------------------------------------------------------------------------------------------------------------------------------------------------------------------------------------------------------------------------------------------------------------------------------------------------------------------------------------------------------------------------------------------------------------------------------------------------------------------------------------------------------------------------------------------------------------------------------------------------------------|
| <p>1</p> <p>2</p> <p>3 Society of Thoracic</p> <p>4</p> <p>5 Surgeons database</p> <p>6</p> <p>7</p> <p>8</p> <p>9</p> <p>10</p> <p>11</p> <p>12</p> <p>13</p>                                                                                                                                                                                                                                                                                                                                             | <ul style="list-style-type: none"> <li>- Thirty-day mortality</li> <li>- Thirty-day hospital readmission</li> <li>- Postoperative atrial fibrillation</li> <li>- Postoperative venous thromboembolism</li> <li>- Postoperative acute respiratory distress syndrome</li> </ul>                                                                                                                                                                                                                                                                                                                                                                                                                                                                                                                                                                                                                          |
| <p>14</p> <p>15 SATISFY-SOS registry</p> <p>16</p> <p>17</p> <p>18</p> <p>19</p> <p>20</p> <p>21</p> <p>22</p> <p>23</p> <p>24</p> <p>25</p> <p>26</p> <p>27</p> <p>28</p> <p>29</p> <p>30</p> <p>31</p> <p>32</p> <p>33</p> <p>34</p> <p>35</p> <p>36</p> <p>37</p> <p>38</p> <p>39</p> <p>40</p> <p>41</p> <p>42</p> <p>43</p> <p>44</p> <p>45</p> <p>46</p> <p>47</p> <p>48</p> <p>49</p> <p>50</p> <p>51</p> <p>52</p> <p>53</p> <p>54</p> <p>55</p> <p>56</p> <p>57</p> <p>58</p> <p>59</p> <p>60</p> | <ul style="list-style-type: none"> <li>- Patient-reported thirty-day readmission</li> <li>- Patient-reported postoperative myocardial infarction</li> <li>- Patient-reported postoperative cardiac arrest</li> <li>- Patient-reported postoperative heart failure</li> <li>- Patient-reported postoperative cerebrovascular accident</li> <li>- Patient-reported postoperative venous thromboembolism</li> <li>- Patient-reported postoperative respiratory arrest</li> <li>- Patient-reported postoperative pneumonia</li> <li>- Patient-reported severe postoperative pain lasting greater than one day</li> <li>- Patient-reported severe postoperative nausea and vomiting lasting greater than one day</li> <li>- Return to work 30 days after surgery</li> <li>- Quality of life 30 days after surgery</li> <li>- Ability to perform activities of daily living 30 days after surgery</li> </ul> |

## DISCUSSION

### *Implications and Future Directions*

We predict that the successful development of machine learning-based algorithms for predicting adverse postoperative outcomes will impact the perioperative care of surgical patients in important ways. Because our algorithms will utilize time-series data, we expect to be able to use them in real time to provide perioperative health care clinicians with dynamic predictions of their patients' risks for specific adverse outcomes. Because the features in our models will include modifiable risk factors such as blood pressure and concentrations of anesthetic agents, we believe clinicians will be able to make changes that may alter their patients' risk trajectories. To be feasible and efficient, we suggest that the forecasting algorithms could be incorporated into a telemedicine paradigm, such as an anesthesiology control tower for a perioperative suite. Once the forecasting algorithms are developed, we intend to conduct a randomized controlled trial to investigate whether implementation of the algorithms in the operating rooms leads to a reduction in the incidence of adverse postoperative outcomes. The incorporation of machine-learning forecasting algorithms into perioperative care will complement the expertise of clinicians, and has the potential to increase both safety and efficiency.

### *Strengths and Limitations*

One of the greatest strengths of this project is the novel use of machine learning techniques to harness the abundant data in the perioperative electronic medical record. Unlike traditional risk prediction models, which utilize data from a single time point and therefore incorporate only a small fraction of the available information about the patient, our algorithms will take advantage of the rich time-series data generated in the operating rooms and, more broadly, in perioperative settings (e.g., preoperative assessment clinic, postoperative recovery area). Another strength is the efficiency of the proposed modeling techniques, which will need to quickly process large amounts of data. The use of

1  
2  
3 group-based learning will increase the accuracy of the derived models by separating groups of patients  
4  
5 who likely have different relationships between underlying features and the predicted outcomes.  
6  
7

8           This project does have limitations that should be noted. Because the forecasting algorithms will  
9  
10 utilize large quantities of data, generalizability of the results and implementation of the algorithms at  
11  
12 other health care facilities will depend upon the availability of high-quality input data. In particular, the  
13  
14 preoperative evaluation and medical history may not be documented in an electronic format with  
15  
16 discrete analyzable fields at some other institutions. Even when such data are available, differences in  
17  
18 formatting will require caution during implementation at other hospitals.  
19  
20

### 21 22 ***Ethics and Dissemination***

23  
24  
25           This study has been approved by the Human Research Protection Office at Washington  
26  
27 University in St. Louis. As noted earlier in this document, a waiver of informed consent has been  
28  
29 granted for all participants. This work will be funded largely by a grant from the National Science  
30  
31 Foundation (award number 1622678) and from a grant from the Agency for Healthcare Research and  
32  
33 Quality (R21 HS24581-01).  
34  
35

36  
37  
38           Once this investigation has been completed, we intend to publish the results in a peer-reviewed  
39  
40 publication. We also intend to present the results of this work at professional conferences for both the  
41  
42 anesthesiology and computer science communities. In accordance with the recent proposal from the  
43  
44 International Committee of Medical Journal Editors, patient-level data will be made available within six  
45  
46 months after publication of the primary manuscript.<sup>52</sup> Data will be provided to researchers who submit  
47  
48 a methodologically sound research proposal including a protocol and statistical analysis plan.  
49  
50  
51  
52  
53  
54  
55  
56  
57  
58  
59  
60

## REFERENCES

1. Kertai MD, Pal N, Palanca BJ, et al. Association of perioperative risk factors and cumulative duration of low bispectral index with intermediate-term mortality after cardiac surgery in the B-Unaware Trial. *Anesthesiology* 2010;112(5):1116-27. doi: 10.1097/ALN.0b013e3181d5e0a3 [published Online First: 2010/04/27]
2. Kertai MD, Palanca BJ, Pal N, et al. Bispectral index monitoring, duration of bispectral index below 45, patient risk factors, and intermediate-term mortality after noncardiac surgery in the B-Unaware Trial. *Anesthesiology* 2011;114(3):545-56. doi: 10.1097/ALN.0b013e31820c2b57 [published Online First: 2011/02/05]
3. Walsh M, Devereaux PJ, Garg AX, et al. Relationship between intraoperative mean arterial pressure and clinical outcomes after noncardiac surgery: toward an empirical definition of hypotension. *Anesthesiology* 2013;119(3):507-15. doi: 10.1097/ALN.0b013e3182a10e26 [published Online First: 2013/07/10]
4. Walsh M, Garg AX, Devereaux PJ, et al. The association between perioperative hemoglobin and acute kidney injury in patients having noncardiac surgery. *Anesthesia and analgesia* 2013;117(4):924-31. doi: 10.1213/ANE.0b013e3182a1ec84 [published Online First: 2013/09/12]
5. Devereaux PJ, Yang H, Yusuf S, et al. Effects of extended-release metoprolol succinate in patients undergoing non-cardiac surgery (POISE trial): a randomised controlled trial. *Lancet* 2008;371(9627):1839-47. doi: 10.1016/s0140-6736(08)60601-7 [published Online First: 2008/05/16]
6. Kheterpal S, Tremper KK, Englesbe MJ, et al. Predictors of postoperative acute renal failure after noncardiac surgery in patients with previously normal renal function. *Anesthesiology* 2007;107(6):892-902. doi: 10.1097/01.anes.0000290588.29668.38 [published Online First: 2007/11/29]
7. Sharifpour M, Moore LE, Shanks AM, et al. Incidence, predictors, and outcomes of perioperative stroke in noncarotid major vascular surgery. *Anesthesia and analgesia* 2013;116(2):424-34. doi: 10.1213/ANE.0b013e31826a1a32 [published Online First: 2012/11/02]
8. Bhave PD, Goldman LE, Vittinghoff E, et al. Incidence, predictors, and outcomes associated with postoperative atrial fibrillation after major noncardiac surgery. *American heart journal* 2012;164(6):918-24. doi: 10.1016/j.ahj.2012.09.004 [published Online First: 2012/12/01]
9. Willingham MD, Karren E, Shanks AM, et al. Concurrence of Intraoperative Hypotension, Low Minimum Alveolar Concentration, and Low Bispectral Index Is Associated with Postoperative Death. *Anesthesiology* 2015;123(4):775-85. doi: 10.1097/aln.0000000000000822 [published Online First: 2015/08/13]
10. Willingham M, Ben Abdallah A, Gradwohl S, et al. Association between intraoperative electroencephalographic suppression and postoperative mortality. *British journal of anaesthesia* 2014;113(6):1001-8. doi: 10.1093/bja/aeu105 [published Online First: 2014/05/24]
11. Aranake A, Gradwohl S, Ben-Abdallah A, et al. Increased risk of intraoperative awareness in patients with a history of awareness. *Anesthesiology* 2013;119(6):1275-83. doi: 10.1097/aln.0000000000000023 [published Online First: 2013/10/12]
12. Sessler DI, Sigl JC, Kelley SD, et al. Hospital stay and mortality are increased in patients having a "triple low" of low blood pressure, low bispectral index, and low minimum alveolar concentration of volatile anesthesia. *Anesthesiology* 2012;116(6):1195-203. doi: 10.1097/ALN.0b013e31825683dc [published Online First: 2012/05/02]

13. Wang Y, Chen W, Heard K, et al. Mortality Prediction in ICUs Using A Novel Time-Slicing Cox Regression Method. *AMIA Annual Symposium proceedings / AMIA Symposium AMIA Symposium 2015*;2015:1289-95. [published Online First: 2015/01/01]
14. Kellum JA, Lameire N. Diagnosis, evaluation, and management of acute kidney injury: a KDIGO summary (Part 1). *Critical care* 2013;17(1):1.
15. Hackmann G, Chen M, Chipara O, et al. Toward a two-tier clinical warning system for hospitalized patients. *AMIA Annual Symposium proceedings / AMIA Symposium AMIA Symposium 2011*;2011:511-9. [published Online First: 2011/12/24]
16. Bailey TC, Chen Y, Mao Y, et al. A trial of a real-time alert for clinical deterioration in patients hospitalized on general medical wards. *Journal of hospital medicine : an official publication of the Society of Hospital Medicine* 2013;8(5):236-42. doi: 10.1002/jhm.2009 [published Online First: 2013/02/27]
17. Density-based logistic regression. Proceedings of the 19th ACM SIGKDD international conference on Knowledge discovery and data mining; 2013. ACM.
18. Dowdy S, Weardon S. Statistics for Research. Hoboken, NJ: Wiley 1983.
19. George A, Wild C. Nonlinear Regression. Hoboken, NJ: Wiley 2003.
20. Haralick RM, Shanmugam K. Textural features for image classification. *IEEE Transactions on systems, man, and cybernetics* 1973(6):610-21.
21. Arthanari T, Dodge Y. Mathematical Programming in Statistics. Hoboken, NJ: Wiley 1993.
22. Penzel T, Kantelhardt JW, Grote L, et al. Comparison of detrended fluctuation analysis and spectral analysis for heart rate variability in sleep and sleep apnea. *IEEE transactions on bio-medical engineering* 2003;50(10):1143-51. doi: 10.1109/tbme.2003.817636 [published Online First: 2003/10/17]
23. An integrated data mining approach to real-time clinical monitoring and deterioration warning. Proceedings of the 18th ACM SIGKDD international conference on Knowledge discovery and data mining; 2012. ACM.
24. Pincus SM. Approximate entropy as a measure of system complexity. *Proceedings of the National Academy of Sciences of the United States of America* 1991;88(6):2297-301. [published Online First: 1991/03/15]
25. Heart rate and respiration relationships as a diagnostic tool for late onset sepsis in sick preterm infants. 2006 Computers in Cardiology; 2006. IEEE.
26. Synchronization index for quantifying nonlinear causal coupling between RR interval and systolic arterial pressure after myocardial infarction. Computers in Cardiology 2000; 2000. IEEE.
27. Lin J, Khade R, Li Y. Rotation-invariant similarity in time series using bag-of-patterns representation. *Journal of Intelligent Information Systems* 2012;39(2):287-315.
28. Baydogan MG, Runger G, Tuv E. A bag-of-features framework to classify time series. *IEEE transactions on pattern analysis and machine intelligence* 2013;35(11):2796-802. doi: 10.1109/tpami.2013.72 [published Online First: 2013/09/21]
29. Deng H, Runger G, Tuv E, et al. A time series forest for classification and feature extraction. *Information Sciences* 2013;239:142-53.
30. Transformation Based Ensembles for Time Series Classification. SDM; 2012. SIAM.
31. Caiado J, Crato N, Peña D. A periodogram-based metric for time series classification. *Computational Statistics & Data Analysis* 2006;50(10):2668-84.
32. Bagnall A, Janacek G. A run length transformation for discriminating between auto regressive time series. *Journal of classification* 2014;31(2):154-78.
33. Time series shapelets: a new primitive for data mining. Proceedings of the 15th ACM SIGKDD international conference on Knowledge discovery and data mining; 2009. ACM.

- 1
- 2
- 3
- 4 34. A shapelet transform for time series classification. Proceedings of the 18th ACM SIGKDD
- 5 international conference on Knowledge discovery and data mining; 2012. ACM.
- 6 35. Learning time-series shapelets. Proceedings of the 20th ACM SIGKDD international conference on
- 7 Knowledge discovery and data mining; 2014. ACM.
- 8 36. Fast shapelets: A scalable algorithm for discovering time series shapelets. Proceedings of the 13th
- 9 SIAM international conference on data mining; 2013. SIAM.
- 10 37. Fukushima K. Neocognitron: A self-organizing neural network model for a mechanism of pattern
- 11 recognition unaffected by shift in position. *Biological cybernetics* 1980;36(4):193-202.
- 12 38. Facenet: A unified embedding for face recognition and clustering. Proceedings of the IEEE
- 13 Conference on Computer Vision and Pattern Recognition; 2015.
- 14 39. Delving deep into rectifiers: Surpassing human-level performance on imagenet classification.
- 15 Proceedings of the IEEE International Conference on Computer Vision; 2015.
- 16 40. An integrated machine learning approach to stroke prediction. Proceedings of the 16th ACM SIGKDD
- 17 international conference on Knowledge discovery and data mining; 2010. ACM.
- 18 41. Shi J, Yin W, Osher S, et al. A fast hybrid algorithm for large-scale l1-regularized logistic regression.
- 19 *Journal of Machine Learning Research* 2010;11(Feb):713-41.
- 20 42. Moore RC, DeNero J. L1 and L2 regularization for multiclass hinge loss models. 2011
- 21 43. Schwarz G. Estimating the dimension of a model. *The annals of statistics* 1978;6(2):461-64.
- 22 44. Grünwald PD. The minimum description length principle: MIT press 2007.
- 23 45. Breiman L. Bagging predictors. *Machine learning* 1996;24(2):123-40.
- 24 46. Liu X-Y, Wu J, Zhou Z-H. Exploratory undersampling for class-imbalance learning. *IEEE Transactions*
- 25 *on Systems, Man, and Cybernetics, Part B (Cybernetics)* 2009;39(2):539-50.
- 26 47. Elgammal A, Duraiswami R, Davis LS. Efficient kernel density estimation using the fast gauss
- 27 transform with applications to color modeling and tracking. *IEEE transactions on pattern analysis*
- 28 *and machine intelligence* 2003;25(11):1499-504.
- 29 48. Ferguson TS. An inconsistent maximum likelihood estimate. *Journal of the American Statistical*
- 30 *Association* 1982;77(380):831-34.
- 31 49. Parallelized stochastic gradient descent. Advances in neural information processing systems; 2010.
- 32 50. Abu-Hanna A, de Keizer N. Integrating classification trees with local logistic regression in Intensive
- 33 Care prognosis. *Artificial Intelligence in Medicine* 2003;29(1):5-23.
- 34 51. Efron B, Tibshirani RJ. An introduction to the bootstrap Chapman & Hall. *New York* 1993;436
- 35 52. Taichman DB, Backus J, Baethge C, et al. Sharing Clinical Trial Data--A Proposal from the International
- 36 Committee of Medical Journal Editors. *The New England journal of medicine* 2016;374(4):384-6.
- 37 doi: 10.1056/NEJMe1515172 [published Online First: 2016/01/21]
- 38
- 39
- 40
- 41
- 42
- 43
- 44
- 45
- 46
- 47
- 48
- 49
- 50
- 51
- 52
- 53
- 54
- 55
- 56
- 57
- 58
- 59
- 60



**AUTHORS' CONTRIBUTIONS**

Bradley A Fritz, MD, contributed to overall study design, initial draft of protocol, and critical revision of protocol.

Yixin Chen, PhD, contributed to development of methods for creation of forecasting algorithms

Teresa M Murray-Torres, MD, contributed to study design and critical revision of protocol

Stephen Gregory, MD, contributed to study design and critical revision of protocol

Arbi Ben Abdallah, PhD, contributed to statistical methods for validation of forecasting algorithms and to critical revision of protocol

Alex Kronzer contributed to study design and critical revision of protocol

Sherry McKinnon contributed to study design and critical revision of protocol

Thaddeus Budelier contributed to critical revision of protocol

Daniel L Helsten, MD, contributed to critical revision of protocol

Troy S Wildes, MD, contributed to study design and critical revision of protocol

Anshuman Sharma, MD, contributed to study design and critical revision of protocol

Michael S Avidan, MBBCh, contributed to overall study design and critical revision of protocol

**FUNDING STATEMENT**

This work will be funded by a grant from the National Science Foundation (award number 1622678) and from a grant from the Agency for Healthcare Research and Quality (R21 HS24581-01).

**COMPETING INTERESTS STATEMENT**

All authors have completed the ICMJE uniform disclosure form at [www.icmje.org/coi\\_disclosure.pdf](http://www.icmje.org/coi_disclosure.pdf) and declare: all authors had financial support from the National Science Foundation and the Agency for Healthcare Research and Quality for the submitted work; no financial relationships with any organisations that might have an interest in the submitted work in the previous three years; no other relationships or activities that could appear to have influenced the submitted work."

# BMJ Open

## Protocol for a Retrospective Study Using Machine Learning Techniques to Develop Forecasting Algorithms for Postoperative Complications: The ACTFAST-2 Study

|                                                                                                                                                                                                                                                     |                                                                                                                                                                                                                                                                                                                                                                                                                                                                                                                                                                                                                                                                                                                                                                                                                                                                                                                                                                                                                                                                                               |
|-----------------------------------------------------------------------------------------------------------------------------------------------------------------------------------------------------------------------------------------------------|-----------------------------------------------------------------------------------------------------------------------------------------------------------------------------------------------------------------------------------------------------------------------------------------------------------------------------------------------------------------------------------------------------------------------------------------------------------------------------------------------------------------------------------------------------------------------------------------------------------------------------------------------------------------------------------------------------------------------------------------------------------------------------------------------------------------------------------------------------------------------------------------------------------------------------------------------------------------------------------------------------------------------------------------------------------------------------------------------|
| Journal:                                                                                                                                                                                                                                            | <i>BMJ Open</i>                                                                                                                                                                                                                                                                                                                                                                                                                                                                                                                                                                                                                                                                                                                                                                                                                                                                                                                                                                                                                                                                               |
| Manuscript ID                                                                                                                                                                                                                                       | bmjopen-2017-020124.R1                                                                                                                                                                                                                                                                                                                                                                                                                                                                                                                                                                                                                                                                                                                                                                                                                                                                                                                                                                                                                                                                        |
| Article Type:                                                                                                                                                                                                                                       | Protocol                                                                                                                                                                                                                                                                                                                                                                                                                                                                                                                                                                                                                                                                                                                                                                                                                                                                                                                                                                                                                                                                                      |
| Date Submitted by the Author:                                                                                                                                                                                                                       | 18-Dec-2017                                                                                                                                                                                                                                                                                                                                                                                                                                                                                                                                                                                                                                                                                                                                                                                                                                                                                                                                                                                                                                                                                   |
| Complete List of Authors:                                                                                                                                                                                                                           | Fritz, Bradley; Washington University School of Medicine in St. Louis, Anesthesiology<br>Chen, Yixin; Washington University in Saint Louis, Computer Science and Engineering<br>Murray-Torres, Teresa; Washington University School of Medicine in St. Louis, Anesthesiology<br>Gregory, SH; Washington University School of Medicine in St. Louis, Anesthesiology<br>Ben Abdallah, Arbi; Washington University School of Medicine in St. Louis, Anesthesiology<br>Kronzer, Alex; Washington University School of Medicine in St. Louis, Anesthesiology<br>McKinnon, Sherry; Washington University School of Medicine, Anesthesiology<br>Budelier, Thaddeus; Washington University School of Medicine in St. Louis, Anesthesiology<br>Helsten, Daniel; Washington University School of Medicine in St. Louis, Anesthesiology<br>Wildes, Troy; Washington University in Saint Louis School of Medicine, Anesthesiology<br>Sharma, Anshuman; Washington University School of Medicine in St. Louis, Anesthesiology<br>Avidan, Michael; Washington University School of Medicine, Anesthesiology |
| <b>Primary Subject Heading</b>:                                                                                                                                                                                                                     | Anaesthesia                                                                                                                                                                                                                                                                                                                                                                                                                                                                                                                                                                                                                                                                                                                                                                                                                                                                                                                                                                                                                                                                                   |
| Secondary Subject Heading:                                                                                                                                                                                                                          | Health informatics                                                                                                                                                                                                                                                                                                                                                                                                                                                                                                                                                                                                                                                                                                                                                                                                                                                                                                                                                                                                                                                                            |
| Keywords:                                                                                                                                                                                                                                           | Adult anaesthesia < ANAESTHETICS, Information technology < BIOTECHNOLOGY & BIOINFORMATICS, Health informatics < BIOTECHNOLOGY & BIOINFORMATICS                                                                                                                                                                                                                                                                                                                                                                                                                                                                                                                                                                                                                                                                                                                                                                                                                                                                                                                                                |
| <p>Note: The following files were submitted by the author for peer review, but cannot be converted to PDF. You must view these files (e.g. movies) online.</p> <p>Data Dictionary v4 Tab1 - Preop.xls<br/>Data Dictionary v4 Tab2 - Intraop.xls</p> |                                                                                                                                                                                                                                                                                                                                                                                                                                                                                                                                                                                                                                                                                                                                                                                                                                                                                                                                                                                                                                                                                               |

1  
2  
3  
4  
5  
6  
7  
8  
9  
10  
11  
12  
13  
14  
15  
16  
17  
18  
19  
20  
21  
22  
23  
24  
25  
26  
27  
28  
29  
30  
31  
32  
33  
34  
35  
36  
37  
38  
39  
40  
41  
42  
43  
44  
45  
46  
47  
48  
49  
50  
51  
52  
53  
54  
55  
56  
57  
58  
59  
60

Data Dictionary v4 Tab3 - SATISFY-SOS Outcomes.xls  
Data Dictionary v4 Tab4 - Sunrise Outcomes.xls

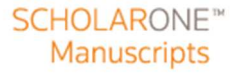

For peer review only

1  
2  
3 **Protocol for a Retrospective Study Using Machine Learning Techniques to Develop Forecasting**

4  
5 **Algorithms for Postoperative Complications: The ACTFAST-2 Study**

6  
7  
8  
9  
10  
11 Bradley A Fritz, MD, Resident Physician<sup>1</sup>

12  
13  
14 Yixin Chen, PhD, Professor<sup>2</sup>

15  
16  
17 Teresa M Murray-Torres, MD, Resident Physician<sup>1</sup>

18  
19  
20 Stephen Gregory, MD, Instructor<sup>1</sup>

21  
22  
23 Arbi Ben Abdallah, PhD, Assistant Professor<sup>1</sup>

24  
25  
26 Alex Kronzer, Database Analyst<sup>1</sup>

27  
28  
29 Sherry McKinnon, Project Manager<sup>1</sup>

30  
31  
32 Thaddeus Budelier, Research Coordinator<sup>1</sup>

33  
34  
35 Daniel L Helsten, MD, Associate Professor<sup>1</sup>

36  
37  
38 Troy S Wildes, MD, Associate Professor<sup>1</sup>

39  
40  
41 Anshuman Sharma, MD, Professor<sup>1</sup>

42  
43  
44 Michael S Avidan, MBBCh, Professor<sup>1</sup>

45  
46  
47  
48  
49  
50  
51 1 – Department of Anesthesiology, Washington University in St. Louis, St. Louis, MO, USA

1  
2  
3 2 – Department of Computer Science and Engineering, Washington University in St. Louis, St. Louis, MO,  
4

5 USA  
6  
7  
8  
9  
10

11 Corresponding Author: Bradley Fritz  
12

13  
14 1 Barnes Jewish Hospital Plaza  
15

16  
17 St. Louis, MO, 63108  
18

19  
20  
21 (314) 747-4155  
22

23  
24 bafritz@wustl.edu  
25  
26  
27  
28  
29  
30  
31  
32  
33  
34  
35  
36  
37  
38  
39  
40  
41  
42  
43  
44  
45  
46  
47  
48  
49  
50  
51  
52  
53  
54  
55  
56  
57  
58  
59  
60

## ABSTRACT

**Introduction** – Mortality and morbidity following surgery are pressing public health concerns in the United States. Traditional prediction models for postoperative adverse outcomes demonstrate good discrimination at the population level, but the ability to forecast an individual patient's trajectory in real time remains poor. We propose to apply machine-learning techniques to perioperative time-series data to develop algorithms for predicting adverse perioperative outcomes.

**Methods and Analysis** – This study will include all adult patients who had surgery at our tertiary care hospital over a four-year period. Patient history, laboratory values, minute-by-minute intraoperative vital signs, and medications administered will be extracted from the electronic medical record. Outcomes will include in-hospital mortality, postoperative acute kidney injury, and postoperative respiratory failure. Forecasting algorithms for each of these outcomes will be constructed using density-based logistic regression after employing a Nadaraya-Watson kernel density estimator. Time-series variables will be analyzed using first- and second-order feature extraction, shapelet methods, and convolutional neural networks. The algorithms will be validated through measurement of precision and recall.

**Ethics and Dissemination** – This study has been approved by the Human Research Protection Office at Washington University in St. Louis. The successful development of these forecasting algorithms will allow perioperative health care clinicians to predict more accurately an individual patient's risk for specific adverse perioperative outcomes in real time. Knowledge of a patient's dynamic risk profile may allow clinicians to make targeted changes in the care plan that will alter the patient's outcome trajectory. This hypothesis will be tested in a future randomized controlled trial.

### STRENGTHS AND LIMITATIONS OF THIS STUDY

- Will utilize modeling techniques that take advantage of the rich time-series data that are available, rather than data from a single time point
- Will utilize efficient modeling techniques that can process large amounts of data quickly
- Will utilize group-based learning to increase model accuracy by separating groups of patients who likely have different relationship between underlying features and predicted outcomes
- Dissemination to other health care facilities may be limited by the availability of high-quality preoperative and intraoperative input data in a usable format



## INTRODUCTION

An estimated 40 million people undergo surgery every year in the United States. Postoperative mortality rate at one year for surgical inpatients is between 5 and 10 percent,(1, 2) and an estimated 10 percent of surgical patients suffer major in-hospital morbidity.(3-8) Perioperative morbidity and mortality are therefore pressing public health concerns. Many patient characteristics, including comorbid medical conditions, associate strongly and independently with perioperative mortality and major morbidity.(1, 2, 9-11) While many of these characteristics are not modifiable, some perioperative risk factors, such as intraoperative blood pressures and anesthetic concentrations,(1, 2, 9, 10) can be modified in real time. Although the association between perioperative variables and postoperative outcomes has been well established at the population level using approaches such as standard logistic regression, (1, 2, 9, 10, 12) the ability to utilize deviations in physiological parameters in real time to dynamically forecast the trajectory of each individual patient remains poor.

There is a gap in the field with an opportunity to assess the potential utility of machine learning-based forecasting algorithms to anticipate adverse perioperative outcomes, guide interventions, and improve overall quality of care. Standard forecasting models, such as logistic regression, linear regression, and other statistical modeling procedures, have long been used to identify and prioritize risk factors for adverse outcomes. Although most of these statistical techniques have been shown to have moderate predictive values, they are limited in their prognostic ability and practical use.(1, 2, 6, 9, 10) In contrast to standard forecasting models, we have demonstrated machine learning and data mining approaches for patients on intensive care units that generate markedly superior prediction for outcomes such as mortality.(13) Our methods differ from standard statistical techniques in their ability to effectively incorporate time-series data. Most standard modeling techniques for surgical patients are based on a snapshot scheme, which only considers the data values at a given moment. They are not

1  
2  
3 competent in extracting features from time-series data, especially in real-time fashion, such as temporal  
4 trends and shapes. Therefore, the objective of this study is to utilize machine-learning techniques to  
5 build forecasting algorithms that use patient characteristics and high-fidelity intraoperative time-series  
6 data to predict adverse perioperative outcomes.  
7  
8  
9  
10  
11  
12  
13  
14  
15  
16  
17  
18  
19  
20  
21  
22  
23  
24  
25  
26  
27  
28  
29  
30  
31  
32  
33  
34  
35  
36  
37  
38  
39  
40  
41  
42  
43  
44  
45  
46  
47  
48  
49  
50  
51  
52  
53  
54  
55  
56  
57  
58  
59  
60

## METHODS AND ANALYSIS

### *Study Design*

Our central hypothesis is that with sufficient knowledge of patient characteristics coupled with repeated, high-fidelity time series data from the perioperative electronic medical record, advanced models can be constructed for individual patients that will forecast adverse perioperative outcomes. To test this hypothesis, we will conduct an observational cohort study of adult patients who undergo surgery at Barnes-Jewish Hospital in St. Louis, Missouri. First, we plan to develop forecasting algorithms for specific adverse perioperative outcomes using historical data. Next, we plan to validate these algorithms by determining whether they can be used to reliably forecast individual adverse perioperative outcomes.

### *Patient Population and Sample Size*

This study will include all adult patients who had surgery in the 48 operating rooms at Barnes-Jewish Hospital in St. Louis, Missouri between June 1, 2012 and August 31, 2016. Patients who receive anesthesia care in areas outside the main operating rooms, such as the obstetric suite or the outpatient surgery suite, will not be included. Barnes-Jewish Hospital is a 1,252-bed academic university-affiliated adult tertiary care hospital, performing approximately 19,000 surgeries a year. We therefore anticipate that gathering data from a 4.25-year period will lead to a total sample size of approximately 80,000-90,000 surgeries for algorithm development and validation.

The Human Research Protection Office at Washington University in St. Louis has granted a waiver of informed consent for all subjects enrolled in this study. This study has been determined to involve no more than minimal risk to participants, as no additional data will be collected beyond that already contained in the electronic record. For the same reason, the waiver of consent will not adversely

1  
2  
3 affect the participants' rights and welfare. It is impracticable to conduct this research without a waiver  
4  
5 of consent because 100% participation from the patients is imperative to obtain scientifically sound  
6  
7 data.  
8  
9

### 10 ***Data Acquisition***

11  
12  
13 For this project, we will use a variety of electronic medical record sources to cover the entire  
14  
15 perioperative period. Much of the relevant information will be imported from MetaVision®(iMDsoft,  
16  
17 Wakefield, MA), an anesthesiology information management software system that is the perioperative  
18  
19 electronic clinical documentation system currently utilized by the Department of Anesthesiology.  
20  
21 MetaVision® captures comprehensive clinical data beginning with the preoperative assessment and  
22  
23 continuing throughout the duration of the perioperative period. Information captured preoperatively  
24  
25 includes patients' past medical and surgical histories, chronic medical issues, medications used, and  
26  
27 functional capacity. Intraoperatively, minute-by-minute vital signs are captured, in addition to fluid  
28  
29 balances, ventilator parameters, and anesthetic medications administered. Blood pressure  
30  
31 measurements are available at intervals ranging from once per minute to once every five minutes, while  
32  
33 other vital signs are captured once per minute. Thus, a three-hour procedure would have about 180  
34  
35 measurements for each vital sign. All data fields are alphanumeric and are captured in a uniform and  
36  
37 granular manner allowing for easy coding and data analysis. Reports from MetaVision® are commonly  
38  
39 used to support many patient safety and quality improvement initiatives in addition to numerous  
40  
41 research studies.  
42  
43  
44  
45  
46  
47

48 Postoperative outcome data will be obtained from Sunrise Clinical Manager (Allscripts, Chicago,  
49  
50 IL), the electronic medical record currently used for inpatient care at Barnes-Jewish Hospital. Data will  
51  
52 also be obtained from several registries, including the Systematic Assessment and Targeted  
53  
54 Improvement of Services Following Yearlong Surgical Outcomes Surveys (SATISFY-SOS) patient-reported  
55  
56  
57  
58  
59  
60

1  
2  
3 outcomes registry (NCT02032030), the National Surgical Quality Improvement Program (NSQIP)  
4  
5 database, the Society of Thoracic Surgeons (STS) database. Preoperative and postoperative laboratory  
6  
7 values will be obtained from the Center for Biomedical Informatics at Washington University, which  
8  
9 hosts the data repository where these data are stored once they are processed by the laboratory. In  
10  
11 general, a preoperative complete blood count is available if the patient is undergoing major surgery with  
12  
13 potential significant blood loss or if other clinical reasons are present. Electrolytes and renal function  
14  
15 are available if there is clinical reason to suspect an abnormality (including, but not limited to, patients  
16  
17 with hypertension, diabetes mellitus, or chronic kidney disease). Additional tests, such as hepatic  
18  
19 function and coagulation studies, are available on smaller sets of patients in whom the tests are  
20  
21 clinically indicated. A data dictionary has been included as supplementary files (Data Dictionary v4 Tab1,  
22  
23 Tab2, Tab3, and Tab4) detailing all the data elements that will be captured for this study.  
24  
25  
26  
27

28  
29 The specific outcomes that will be predicted by the forecasting algorithms will include in-  
30  
31 hospital mortality, postoperative acute kidney injury, and postoperative respiratory failure. In-hospital  
32  
33 mortality will be ascertained from Sunrise Clinical Manager. Postoperative acute renal failure will be  
34  
35 defined according to the KDIGO criteria(14): an increase in serum creatinine of 0.3 mg/dL, increase in  
36  
37 serum creatinine to 1.5 times the baseline value, or initiation of renal replacement therapy within 48  
38  
39 hours of surgery end time. Patients receiving renal replacement therapy prior to surgery, patients with  
40  
41 no baseline creatinine available within 30 days prior to surgery, and patients undergoing kidney  
42  
43 transplant or dialysis access procedures will be excluded from analysis of this outcome. Postoperative  
44  
45 respiratory failure will be defined as mechanical ventilation for greater than 48 hours or unplanned  
46  
47 postoperative intubation within 48 hours. These events will be extracted from clinical documentation  
48  
49 recorded by respiratory therapists in Sunrise Clinical Manager. Patients receiving mechanical ventilation  
50  
51 prior to surgery will be excluded from analysis of this outcome.  
52  
53  
54  
55  
56  
57  
58  
59  
60

### ***Data Analysis, Part 1 – Forecasting Algorithm Development***

We will develop hybrid learning techniques to combine the strength of generative models such as histogram and kernel density estimation and discriminative models such as support vector machines, logistic regressions, and kernel machines to improve predictions of adverse perioperative outcomes (in-hospital mortality, postoperative acute renal failure, postoperative respiratory failure). The goal is to deliver superior prediction quality with good interpretability and high computational efficiency that supports fast processing of big data. Based on our preliminary work using density-based logistic regression (DLR) to develop an early clinical deterioration warning system for patients in the general wards of Barnes-Jewish Hospital,(15, 16) we propose to develop novel hybrid data mining/machine learning algorithms that exploit both non-parametric and parametric techniques. For each target outcome, we plan to develop a model that will predict the likelihood of the postoperative outcome in real time using preoperative features and time-series data from the preceding 60 minutes.

DLR first applies a Nadaraya-Watson kernel density estimator, a non-parametric transformation, on the input data to extract features that conform best to the true distribution of data, and then applies the parametric logistic regression model on the transformed features. The resulting model exhibits five desirable properties: nonlinear separation ability, high efficiency, good interpretability, ability to handle mixed data types including numerical and categorical ones, and support for multi-way classification. Our previous results using Barnes-Jewish Hospital clinical data showed that DLR achieves better classification accuracy than state-of-the-art nonlinear classifiers such as support vector machines and KLR but is also much more efficient than nonlinear models.(17) In fact, DLR has the same asymptotic complexity as linear classifiers and can scale up to very large datasets in practice.(17)

To analyze the collected time-series data, we need to extract features that capture temporal patterns, such as a rapid temperature increases or abnormal heart rate fluctuations. To make

1  
2  
3 predictions at a given point in time, time-series values from the preceding 60 minutes will be used.  
4  
5 Missing values will be handled using linear interpolation. We will first extract a large pool of time-series  
6  
7 features including: first-order features such as variance, skewness, and kurtosis, and second-order  
8  
9 features such as energy, entropy, correlation, inertia, and local homogeneity.(18, 19) The second-order  
10  
11 features are known to be robust under noises.(20, 21) Self-similarity is widely observed in human  
12  
13 physiological signs. Detrended fluctuation analysis (22) measures the degree of self-similarity in time  
14  
15 series and has been applied to analyze heartbeat and oxygen levels.(23) Approximate entropy measures  
16  
17 the degree of unpredictability in a time series.(24) Spectral analysis has also been used to analyze  
18  
19 clinical time-series.(22) We will also consider cross-sign features including correlation,(25)  
20  
21 coherence,(25) lagged regression, nonlinear regression,(19) and the synchronization index.(26) We will  
22  
23 also extract features based on the bag-of-patterns approach(27-29) and autocorrelation.(30-32) In  
24  
25 addition, we will also generate features based on shapelets.(33) A shapelet is a subseries that is used to  
26  
27 compare against each time-series. For a shapelet with length  $l$  and a time series  $T$ , the shapelet gives a  
28  
29 feature value which is the minimum Euclidean distance between the shapelet and any subseries of  $T$   
30  
31 with length  $l$ . Efficient methods have been developed to find good shapelets, based on length estimation  
32  
33 and optimized search.(34-36)

34  
35  
36  
37  
38  
39  
40 We will also develop a novel deep learning method to extract more robust features from time-  
41  
42 series. A leading method for feature selection from time series has been the shapelet method. However,  
43  
44 we have shown that deep learning methods can significantly improve over shapelet. Deep learning  
45  
46 methods, especially those using convolutional neural networks (CNNs),(37) have achieved great success  
47  
48 in learning useful representations (features) from images.(38, 39) However, its uses in time-series  
49  
50 classification are very limited. We plan to apply CNNs to time-series data to generate good  
51  
52 representations. We note that the convolutional layers in CNNs can be viewed as a collection of local  
53  
54 filters over the input space; the filters' weights are learnt through back propagation. The filters in CNNs  
55  
56  
57  
58  
59  
60

1  
2  
3 regulate the time series in different frequency bands, and the dot product operations in the CNNs  
4  
5 measure distances between two subseries. Thus, CNNs can be viewed as a more general framework  
6  
7 than shapelet learning which can adaptively find the suitable down-sampling rates and scales of the  
8  
9 shapelets.  
10

11  
12  
13 Our preliminary work has shown that it is beneficial to use a large feature set: the modeling  
14  
15 accuracy increases as more features are used and the top features in the final model include features  
16  
17 from different categories.(23) With the above features, we will address overfitting. An overfit model  
18  
19 will generally have poor predictive performance and interpretability. We will investigate three schemes  
20  
21 to avoid over-fitting including: 1) using feature selection methods, such as forward feature selection  
22  
23 based on F-score or area-under-curve score,(40) to find the most discriminative features; 2) adding  
24  
25 regularization terms (such as L1,(41) L2,(42) Akaike information criterion, Bayesian information  
26  
27 criterion,(43) minimum description length,(44) or a probabilistic prior) to the optimization objective; and  
28  
29 3) using meta-techniques such as bootstrap aggregation (45) and exploratory undersampling (46) to  
30  
31 further address overfitting and class imbalance.  
32  
33  
34  
35

36 We plan to use bin-based kernel density estimation, another non-parametric technique, to  
37  
38 process the input features in each dimension. In previously described DLR, we use the Nadaraya-  
39  
40 Watson kernel density estimator for each data point in each dimension, which has time complexity of  
41  
42  $O(mN^2)$  where  $m$  is the number of dimensions and  $N$  is the number of data points. Therefore, it is still  
43  
44 slow for big datasets with a large  $N$ . Bin-based kernel density estimation differs from the Nadaraya-  
45  
46 Watson kernel density estimator in that we divide each dimension into equal-sized bins and estimate  
47  
48 the density for each bin instead of each data point. This will reduce the time into  $O(mB^2)$  where  $B \ll N$  is  
49  
50 the number of bins. Note that instead of using a simple histogram count for each bin, we will use a  
51  
52 Gaussian kernel function to smooth the density estimation across bins. The time complexity can be  
53  
54  
55  
56  
57  
58  
59  
60



1  
2  
3 further reduced to  $O(mB)$  using techniques such as Gauss transformation.(47) Such dramatic reduction  
4  
5 of computing time will enable us to process large datasets and perform quick model-building. We will  
6  
7 also combine the kernel density estimator-based features with other parametric models such as Cox  
8  
9 regression.  
10

11  
12  
13 We will leverage a hierarchical optimization algorithm for training DLR,(17) which automatically  
14  
15 learns free parameters in the model under a maximum likelihood framework. This optimization  
16  
17 formulation not only learns the coefficients in the model, but also provides a way to automatically select  
18  
19 the kernel bandwidth in the Nadaraya-Watson estimator or the bin size in the bin-based kernel density  
20  
21 estimation, which is absent in previous work. We will also employ techniques including stochastic  
22  
23 gradient descent (48) and its parallelized implementation (49) to further enhance the scalability of the  
24  
25 training algorithm.  
26  
27

28  
29 Our algorithm will utilize group-based modeling. The idea is to first use a few key features to  
30  
31 divide the patients into some major categories, and then train a separate classifier for each category.  
32  
33 The intuition is that from clinical knowledge, we know that some different groups of patients have  
34  
35 drastically different behaviors and should correspond to different statistical models. Mixing such vastly  
36  
37 different groups together to train a single model may not give the best result. Therefore, it is  
38  
39 instrumental to identify important sub-populations of patients, before we use sophisticated hybrid  
40  
41 algorithms to accurately model the patients in each group. For a simple example, we can group the  
42  
43 patients into a few age ranges, e.g., <45, 45-55, 56-65, etc. Although age can be used as a feature in a  
44  
45 single classifier for all patients, such explicit division leads to multiple, more specific classifiers. It can be  
46  
47 viewed as a hybrid algorithm combining a decision tree with other classifiers. We may also use metrics  
48  
49 defined on multiple attributes to group the patients. Features that will be used as classifiers will include  
50  
51 age, sex, and surgery type (cardiac versus non-cardiac). To systematically integrate such clinical  
52  
53  
54  
55  
56  
57  
58  
59  
60

1  
2  
3 knowledge into modeling, we plan to study hybrid models that are mixture of two or more classifiers.  
4  
5 For example, we can construct a global decision tree whose nodes denote patient groups, where each  
6  
7 group is modeled by a local classifier such as DLR. Different nodes may use different types of classifiers.  
8  
9  
10 Previous work on a similar idea has demonstrated improved performance (50) in an intensive care  
11  
12 prognosis application.  
13  
14

### 15 ***Data Analysis, Part 2 – Forecasting Algorithm Validation***

16  
17  
18 After algorithm development, the forecasting algorithms will be tested for accuracy of their  
19  
20 predictive performances in two ways. First, algorithm validity will be tested within the historical  
21  
22 database by dividing the database into training, validation, and testing datasets. Second, the  
23  
24 performance of the developed algorithms will be additionally validated prospectively (out-of-sample  
25  
26 performance), using precision and recall.  
27  
28  
29

30  
31 For initial model training and validation, the historical database will be divided into a training  
32  
33 dataset (60% of the database), a validation dataset (20% of the database), and a testing dataset (20% of  
34  
35 the database). Because we expect that our target outcomes will be relatively rare events, overall  
36  
37 classification accuracy is not likely to be a useful measure of model performance. Instead, we will use  
38  
39 precision (true positives/[true positives + false positives]) and recall (true positives/[true positives + false  
40  
41 negatives]). We will optimize model parameters using the training dataset. Then we will pre-specify our  
42  
43 desired recall and use the validation dataset to select the decision threshold that leads to the highest  
44  
45 precision without sacrificing our desired recall. Then we will apply our model to the testing dataset and  
46  
47 report the observed precision and recall.  
48  
49  
50

51  
52 Additionally, we propose to perform a validation test of the predictive performance of the  
53  
54 developed algorithms prospectively, using patient records that did not belong to the learning database.  
55  
56  
57  
58  
59  
60

For this evaluation, we will apply our model to the prospectively-collected data. We will report the observed precision and recall as measures of model performance.

### ***Prespecified Secondary Analyses***

In addition to the primary algorithms described above (in-hospital mortality, postoperative acute kidney injury, and postoperative respiratory failure), we anticipate using the acquired data to develop prediction algorithms for additional outcomes. These outcomes are outlined in Table 1.

**Table 1. Prespecified Secondary Outcomes**

| <b>Data Source</b>                                             | <b>Outcome</b>                                                                                                                                                                                                                                                                                                                                                                                                                                                 |
|----------------------------------------------------------------|----------------------------------------------------------------------------------------------------------------------------------------------------------------------------------------------------------------------------------------------------------------------------------------------------------------------------------------------------------------------------------------------------------------------------------------------------------------|
| Sunrise Clinical Manager                                       | <ul style="list-style-type: none"> <li>- Thirty-day hospital readmission</li> <li>- Intensive care unit admission</li> <li>- Postoperative delirium</li> </ul>                                                                                                                                                                                                                                                                                                 |
| National Surgical Quality Improvement Program (NSQIP) database | <ul style="list-style-type: none"> <li>- Thirty-day mortality</li> <li>- Thirty-day hospital readmission</li> <li>- Unplanned intubation</li> <li>- Postoperative sepsis</li> <li>- Postoperative myocardial infarction</li> <li>- Postoperative cerebrovascular accident</li> <li>- Postoperative pulmonary embolism</li> <li>- Postoperative deep vein thrombosis</li> <li>- Postoperative cardiac arrest requiring cardiopulmonary resuscitation</li> </ul> |
| Society of Thoracic                                            | <ul style="list-style-type: none"> <li>- Thirty-day mortality</li> </ul>                                                                                                                                                                                                                                                                                                                                                                                       |

|                      |                                                                                                                                                                                                                                                                                                                                                                                                                                                                                                                                                                                                                                                                                                                                                                                                                                                                                                        |
|----------------------|--------------------------------------------------------------------------------------------------------------------------------------------------------------------------------------------------------------------------------------------------------------------------------------------------------------------------------------------------------------------------------------------------------------------------------------------------------------------------------------------------------------------------------------------------------------------------------------------------------------------------------------------------------------------------------------------------------------------------------------------------------------------------------------------------------------------------------------------------------------------------------------------------------|
| Surgeons database    | <ul style="list-style-type: none"> <li>- Thirty-day hospital readmission</li> <li>- Postoperative atrial fibrillation</li> <li>- Postoperative venous thromboembolism</li> <li>- Postoperative acute respiratory distress syndrome</li> </ul>                                                                                                                                                                                                                                                                                                                                                                                                                                                                                                                                                                                                                                                          |
| SATISFY-SOS registry | <ul style="list-style-type: none"> <li>- Patient-reported thirty-day readmission</li> <li>- Patient-reported postoperative myocardial infarction</li> <li>- Patient-reported postoperative cardiac arrest</li> <li>- Patient-reported postoperative heart failure</li> <li>- Patient-reported postoperative cerebrovascular accident</li> <li>- Patient-reported postoperative venous thromboembolism</li> <li>- Patient-reported postoperative respiratory arrest</li> <li>- Patient-reported postoperative pneumonia</li> <li>- Patient-reported severe postoperative pain lasting greater than one day</li> <li>- Patient-reported severe postoperative nausea and vomiting lasting greater than one day</li> <li>- Return to work 30 days after surgery</li> <li>- Quality of life 30 days after surgery</li> <li>- Ability to perform activities of daily living 30 days after surgery</li> </ul> |

## DISCUSSION

### *Implications and Future Directions*

We anticipate that the successful development of machine learning-based algorithms for predicting adverse postoperative outcomes will impact the perioperative care of surgical patients in important ways. Because our algorithms will utilize time-series data, we expect to be able to use them in real time to provide perioperative health care clinicians with dynamic predictions of their patients' risks for specific adverse outcomes. Because the features in our models will include modifiable risk factors such as blood pressure and concentrations of anesthetic agents, we believe clinicians will be able to make changes that may alter their patients' risk trajectories. The models may also help clinicians make decisions regarding their patients' postoperative disposition (intensive care unit versus hospital ward; inpatient admission versus discharge). To be feasible and efficient, we suggest that the forecasting algorithms could be incorporated into a telemedicine paradigm, such as an anesthesiology control tower for a perioperative suite. Once the forecasting algorithms are developed, we intend to conduct a randomized controlled trial to investigate whether implementation of the algorithms in the operating rooms leads to a reduction in the incidence of adverse postoperative outcomes. The incorporation of machine-learning forecasting algorithms into perioperative care will complement the expertise of clinicians, and has the potential to increase both safety and efficiency.

### *Strengths and Limitations*

One of the greatest strengths of this project is the novel use of machine learning techniques to harness the abundant data in the perioperative electronic medical record. Unlike traditional risk prediction models, which utilize data from a single time point and therefore incorporate only a small fraction of the available information about the patient, our algorithms will take advantage of the rich time-series data generated in the operating rooms and, more broadly, in perioperative settings (e.g.,

1  
2  
3 preoperative assessment clinic, postoperative recovery area). Another strength is the efficiency of the  
4 proposed modeling techniques, which will need to quickly process large amounts of data. The use of  
5 group-based learning will increase the accuracy of the derived models by separating groups of patients  
6 who likely have different relationships between underlying features and the predicted outcomes.  
7  
8  
9

10  
11  
12  
13 This project does have limitations that should be noted. Because the forecasting algorithms will  
14 utilize large quantities of data, generalizability of the results and implementation of the algorithms at  
15 other health care facilities will depend upon the availability of high-quality input data. In particular, the  
16 preoperative evaluation and medical history may not be documented in an electronic format with  
17 discrete analyzable fields at some other institutions. Even when such data are available, differences in  
18 formatting will require caution during implementation at other hospitals.  
19  
20  
21  
22  
23  
24  
25  
26

### 27 ***Ethics and Dissemination***

28  
29  
30 This study has been approved by the Human Research Protection Office at Washington  
31 University in St. Louis. As noted earlier in this document, a waiver of informed consent has been  
32 granted for all participants. This work will be funded largely by a grant from the National Science  
33 Foundation (award number 1622678) and from a grant from the Agency for Healthcare Research and  
34 Quality (R21 HS24581-01).  
35  
36  
37  
38  
39  
40  
41

42 Once this investigation has been completed, we intend to publish the results in a peer-reviewed  
43 publication. We also intend to present the results of this work at professional conferences for both the  
44 anesthesiology and computer science communities. In accordance with the recent proposal from the  
45 International Committee of Medical Journal Editors, patient-level data will be made available within six  
46 months after publication of the primary manuscript.<sup>(51)</sup> Data will be provided to researchers who  
47 submit a methodologically sound research proposal including a protocol and statistical analysis plan. No  
48 patient-identifying fields (including dates) will be included in the shared dataset. Age will be provided in  
49  
50  
51  
52  
53  
54  
55  
56  
57  
58  
59  
60

1  
2  
3 years, unless the patient is older than 89 years. In this case, age will be reported as ">89 years." Any  
4  
5 dates will be presented as "number of days since index surgery."  
6  
7  
8  
9  
10  
11  
12  
13  
14  
15  
16  
17  
18  
19  
20  
21  
22  
23  
24  
25  
26  
27  
28  
29  
30  
31  
32  
33  
34  
35  
36  
37  
38  
39  
40  
41  
42  
43  
44  
45  
46  
47  
48  
49  
50  
51  
52  
53  
54  
55  
56  
57  
58  
59  
60

## REFERENCES

1. Kertai MD, Pal N, Palanca BJ, Lin N, Searleman SA, Zhang L, et al. Association of perioperative risk factors and cumulative duration of low bispectral index with intermediate-term mortality after cardiac surgery in the B-Unaware Trial. *Anesthesiology*. 2010;112(5):1116-27.
2. Kertai MD, Palanca BJ, Pal N, Burnside BA, Zhang L, Sadiq F, et al. Bispectral index monitoring, duration of bispectral index below 45, patient risk factors, and intermediate-term mortality after noncardiac surgery in the B-Unaware Trial. *Anesthesiology*. 2011;114(3):545-56.
3. Walsh M, Devereaux PJ, Garg AX, Kurz A, Turan A, Rodseth RN, et al. Relationship between intraoperative mean arterial pressure and clinical outcomes after noncardiac surgery: toward an empirical definition of hypotension. *Anesthesiology*. 2013;119(3):507-15.
4. Walsh M, Garg AX, Devereaux PJ, Argalious M, Honar H, Sessler DI. The association between perioperative hemoglobin and acute kidney injury in patients having noncardiac surgery. *Anesthesia and analgesia*. 2013;117(4):924-31.
5. Devereaux PJ, Yang H, Yusuf S, Guyatt G, Leslie K, Villar JC, et al. Effects of extended-release metoprolol succinate in patients undergoing non-cardiac surgery (POISE trial): a randomised controlled trial. *Lancet*. 2008;371(9627):1839-47.
6. Kheterpal S, Tremper KK, Englesbe MJ, O'Reilly M, Shanks AM, Fetterman DM, et al. Predictors of postoperative acute renal failure after noncardiac surgery in patients with previously normal renal function. *Anesthesiology*. 2007;107(6):892-902.
7. Sharifpour M, Moore LE, Shanks AM, Didier TJ, Kheterpal S, Mashour GA. Incidence, predictors, and outcomes of perioperative stroke in noncarotid major vascular surgery. *Anesthesia and analgesia*. 2013;116(2):424-34.
8. Bhavé PD, Goldman LE, Vittinghoff E, Maselli J, Auerbach A. Incidence, predictors, and outcomes associated with postoperative atrial fibrillation after major noncardiac surgery. *American heart journal*. 2012;164(6):918-24.
9. Willingham MD, Karren E, Shanks AM, O'Connor MF, Jacobsohn E, Kheterpal S, et al. Concurrence of Intraoperative Hypotension, Low Minimum Alveolar Concentration, and Low Bispectral Index Is Associated with Postoperative Death. *Anesthesiology*. 2015;123(4):775-85.
10. Willingham M, Ben Abdallah A, Gradwohl S, Helsten D, Lin N, Villafranca A, et al. Association between intraoperative electroencephalographic suppression and postoperative mortality. *British journal of anaesthesia*. 2014;113(6):1001-8.
11. Aranake A, Gradwohl S, Ben-Abdallah A, Lin N, Shanks A, Helsten DL, et al. Increased risk of intraoperative awareness in patients with a history of awareness. *Anesthesiology*. 2013;119(6):1275-83.
12. Sessler DI, Sigl JC, Kelley SD, Chamoun NG, Manberg PJ, Saager L, et al. Hospital stay and mortality are increased in patients having a "triple low" of low blood pressure, low bispectral index, and low minimum alveolar concentration of volatile anesthesia. *Anesthesiology*. 2012;116(6):1195-203.
13. Wang Y, Chen W, Heard K, Kollef MH, Bailey TC, Cui Z, et al. Mortality Prediction in ICUs Using A Novel Time-Slicing Cox Regression Method. *AMIA Annual Symposium proceedings / AMIA Symposium AMIA Symposium*. 2015;2015:1289-95.
14. Kellum JA, Lameire N. Diagnosis, evaluation, and management of acute kidney injury: a KDIGO summary (Part 1). *Critical care*. 2013;17(1):1.
15. Hackmann G, Chen M, Chipara O, Lu C, Chen Y, Kollef M, et al. Toward a two-tier clinical warning system for hospitalized patients. *AMIA Annual Symposium proceedings / AMIA Symposium AMIA Symposium*. 2011;2011:511-9.



16. Bailey TC, Chen Y, Mao Y, Lu C, Hackmann G, Micek ST, et al. A trial of a real-time alert for clinical deterioration in patients hospitalized on general medical wards. *Journal of hospital medicine : an official publication of the Society of Hospital Medicine*. 2013;8(5):236-42.
17. Chen W, Chen Y, Mao Y, Guo B, editors. Density-based logistic regression. *Proceedings of the 19th ACM SIGKDD international conference on Knowledge discovery and data mining; 2013: ACM*.
18. Dowdy S, Weardon S. *Statistics for Research*. Hoboken, NJ: Wiley; 1983.
19. George A, Wild C. *Nonlinear Regression*. Hoboken, NJ: Wiley; 2003.
20. Haralick RM, Shanmugam K. Textural features for image classification. *IEEE Transactions on systems, man, and cybernetics*. 1973(6):610-21.
21. Arthanari T, Dodge Y. *Mathematical Programming in Statistics*. Hoboken, NJ: Wiley; 1993.
22. Penzel T, Kantelhardt JW, Grote L, Peter JH, Bunde A. Comparison of detrended fluctuation analysis and spectral analysis for heart rate variability in sleep and sleep apnea. *IEEE transactions on bio-medical engineering*. 2003;50(10):1143-51.
23. Mao Y, Chen W, Chen Y, Lu C, Kollef M, Bailey T, editors. An integrated data mining approach to real-time clinical monitoring and deterioration warning. *Proceedings of the 18th ACM SIGKDD international conference on Knowledge discovery and data mining; 2012: ACM*.
24. Pincus SM. Approximate entropy as a measure of system complexity. *Proceedings of the National Academy of Sciences of the United States of America*. 1991;88(6):2297-301.
25. Loforte R, Carrault G, Mainardi L, Beuche A, editors. Heart rate and respiration relationships as a diagnostic tool for late onset sepsis in sick preterm infants. *2006 Computers in Cardiology; 2006: IEEE*.
26. Nollo G, Faes L, Pellegrini B, Porta A, Antolini R, editors. Synchronization index for quantifying nonlinear causal coupling between RR interval and systolic arterial pressure after myocardial infarction. *Computers in Cardiology 2000; 2000: IEEE*.
27. Lin J, Khade R, Li Y. Rotation-invariant similarity in time series using bag-of-patterns representation. *Journal of Intelligent Information Systems*. 2012;39(2):287-315.
28. Baydogan MG, Runger G, Tuv E. A bag-of-features framework to classify time series. *IEEE transactions on pattern analysis and machine intelligence*. 2013;35(11):2796-802.
29. Deng H, Runger G, Tuv E, Vladimir M. A time series forest for classification and feature extraction. *Information Sciences*. 2013;239:142-53.
30. Bagnall A, Davis LM, Hills J, Lines J, editors. *Transformation Based Ensembles for Time Series Classification*. SDM; 2012: SIAM.
31. Caiado J, Crato N, Peña D. A periodogram-based metric for time series classification. *Computational Statistics & Data Analysis*. 2006;50(10):2668-84.
32. Bagnall A, Janacek G. A run length transformation for discriminating between auto regressive time series. *Journal of classification*. 2014;31(2):154-78.
33. Ye L, Keogh E, editors. Time series shapelets: a new primitive for data mining. *Proceedings of the 15th ACM SIGKDD international conference on Knowledge discovery and data mining; 2009: ACM*.
34. Lines J, Davis LM, Hills J, Bagnall A, editors. A shapelet transform for time series classification. *Proceedings of the 18th ACM SIGKDD international conference on Knowledge discovery and data mining; 2012: ACM*.
35. Grabocka J, Schilling N, Wistuba M, Schmidt-Thieme L, editors. Learning time-series shapelets. *Proceedings of the 20th ACM SIGKDD international conference on Knowledge discovery and data mining; 2014: ACM*.
36. Rakthanmanon T, Keogh E, editors. Fast shapelets: A scalable algorithm for discovering time series shapelets. *Proceedings of the 13th SIAM international conference on data mining; 2013: SIAM*.
37. Fukushima K. Neocognitron: A self-organizing neural network model for a mechanism of pattern recognition unaffected by shift in position. *Biological cybernetics*. 1980;36(4):193-202.

- 1
- 2
- 3
- 4 38. Schroff F, Kalenichenko D, Philbin J, editors. Facenet: A unified embedding for face recognition
- 5 and clustering. Proceedings of the IEEE Conference on Computer Vision and Pattern Recognition; 2015.
- 6 39. He K, Zhang X, Ren S, Sun J, editors. Delving deep into rectifiers: Surpassing human-level
- 7 performance on imagenet classification. Proceedings of the IEEE International Conference on Computer
- 8 Vision; 2015.
- 9 40. Khosla A, Cao Y, Lin CC-Y, Chiu H-K, Hu J, Lee H, editors. An integrated machine learning
- 10 approach to stroke prediction. Proceedings of the 16th ACM SIGKDD international conference on
- 11 Knowledge discovery and data mining; 2010: ACM.
- 12 41. Shi J, Yin W, Osher S, Sajda P. A fast hybrid algorithm for large-scale l1-regularized logistic
- 13 regression. Journal of Machine Learning Research. 2010;11(Feb):713-41.
- 14 42. Moore RC, DeNero J. L1 and L2 regularization for multiclass hinge loss models. 2011.
- 15 43. Schwarz G. Estimating the dimension of a model. The annals of statistics. 1978;6(2):461-4.
- 16 44. Grünwald PD. The minimum description length principle: MIT press; 2007.
- 17 45. Breiman L. Bagging predictors. Machine learning. 1996;24(2):123-40.
- 18 46. Liu X-Y, Wu J, Zhou Z-H. Exploratory undersampling for class-imbalance learning. IEEE
- 19 Transactions on Systems, Man, and Cybernetics, Part B (Cybernetics). 2009;39(2):539-50.
- 20 47. Elgammal A, Duraiswami R, Davis LS. Efficient kernel density estimation using the fast gauss
- 21 transform with applications to color modeling and tracking. IEEE transactions on pattern analysis and
- 22 machine intelligence. 2003;25(11):1499-504.
- 23 48. Ferguson TS. An inconsistent maximum likelihood estimate. Journal of the American Statistical
- 24 Association. 1982;77(380):831-4.
- 25 49. Zinkevich M, Weimer M, Li L, Smola AJ, editors. Parallelized stochastic gradient descent.
- 26 Advances in neural information processing systems; 2010.
- 27 50. Abu-Hanna A, de Keizer N. Integrating classification trees with local logistic regression in
- 28 Intensive Care prognosis. Artificial Intelligence in Medicine. 2003;29(1):5-23.
- 29 51. Taichman DB, Backus J, Baethge C, Bauchner H, de Leeuw PW, Drazen JM, et al. Sharing Clinical
- 30 Trial Data--A Proposal from the International Committee of Medical Journal Editors. The New England
- 31 journal of medicine. 2016;374(4):384-6.
- 32
- 33
- 34
- 35
- 36
- 37
- 38
- 39
- 40
- 41
- 42
- 43
- 44
- 45
- 46
- 47
- 48
- 49
- 50
- 51
- 52
- 53
- 54
- 55
- 56
- 57
- 58
- 59
- 60

### AUTHORS' CONTRIBUTIONS

Bradley A Fritz, MD, contributed to overall study design, initial draft of protocol, and critical revision of protocol.

Yixin Chen, PhD, contributed to development of methods for creation of forecasting algorithms

Teresa M Murray-Torres, MD, contributed to study design and critical revision of protocol

Stephen Gregory, MD, contributed to study design and critical revision of protocol

Arbi Ben Abdallah, PhD, contributed to statistical methods for validation of forecasting algorithms and to critical revision of protocol

Alex Kronzer contributed to study design and critical revision of protocol

Sherry McKinnon contributed to study design and critical revision of protocol

Thaddeus Budelier contributed to critical revision of protocol

Daniel L Helsten, MD, contributed to critical revision of protocol

Troy S Wildes, MD, contributed to study design and critical revision of protocol

Anshuman Sharma, MD, contributed to study design and critical revision of protocol

Michael S Avidan, MBBCh, contributed to overall study design and critical revision of protocol

1  
2  
3 **FUNDING STATEMENT**  
4  
5

6 This work will be funded by a grant from the National Science Foundation (award number 1622678) and  
7  
8 from a grant from the Agency for Healthcare Research and Quality (R21 HS24581-01).  
9

10  
11 **COMPETING INTERESTS STATEMENT**  
12  
13

14 All authors have completed the ICMJE uniform disclosure form at [www.icmje.org/coi\\_disclosure.pdf](http://www.icmje.org/coi_disclosure.pdf)  
15 and declare: all authors had financial support from the National Science Foundation and the Agency  
16 for Healthcare Research and Quality for the submitted work; no financial relationships with any  
17 organisations that might have an interest in the submitted work in the previous three years; no other  
18 relationships or activities that could appear to have influenced the submitted work."  
19  
20  
21  
22  
23  
24  
25  
26  
27  
28  
29  
30  
31  
32  
33  
34  
35  
36  
37  
38  
39  
40  
41  
42  
43  
44  
45  
46  
47  
48  
49  
50  
51  
52  
53  
54  
55  
56  
57  
58  
59  
60

# BMJ Open

## Protocol for a Retrospective Study Using Machine Learning Techniques to Develop Forecasting Algorithms for Postoperative Complications: The ACTFAST-2 Study

|                                 |                                                                                                                                                                                                                                                                                                                                                                                                                                                                                                                                                                                                                                                                                                                                                                                                                                                                                                                                                                                                                                                                                               |
|---------------------------------|-----------------------------------------------------------------------------------------------------------------------------------------------------------------------------------------------------------------------------------------------------------------------------------------------------------------------------------------------------------------------------------------------------------------------------------------------------------------------------------------------------------------------------------------------------------------------------------------------------------------------------------------------------------------------------------------------------------------------------------------------------------------------------------------------------------------------------------------------------------------------------------------------------------------------------------------------------------------------------------------------------------------------------------------------------------------------------------------------|
| Journal:                        | <i>BMJ Open</i>                                                                                                                                                                                                                                                                                                                                                                                                                                                                                                                                                                                                                                                                                                                                                                                                                                                                                                                                                                                                                                                                               |
| Manuscript ID                   | bmjopen-2017-020124.R2                                                                                                                                                                                                                                                                                                                                                                                                                                                                                                                                                                                                                                                                                                                                                                                                                                                                                                                                                                                                                                                                        |
| Article Type:                   | Protocol                                                                                                                                                                                                                                                                                                                                                                                                                                                                                                                                                                                                                                                                                                                                                                                                                                                                                                                                                                                                                                                                                      |
| Date Submitted by the Author:   | 22-Jan-2018                                                                                                                                                                                                                                                                                                                                                                                                                                                                                                                                                                                                                                                                                                                                                                                                                                                                                                                                                                                                                                                                                   |
| Complete List of Authors:       | Fritz, Bradley; Washington University School of Medicine in St. Louis, Anesthesiology<br>Chen, Yixin; Washington University in Saint Louis, Computer Science and Engineering<br>Murray-Torres, Teresa; Washington University School of Medicine in St. Louis, Anesthesiology<br>Gregory, SH; Washington University School of Medicine in St. Louis, Anesthesiology<br>Ben Abdallah, Arbi; Washington University School of Medicine in St. Louis, Anesthesiology<br>Kronzer, Alex; Washington University School of Medicine in St. Louis, Anesthesiology<br>McKinnon, Sherry; Washington University School of Medicine, Anesthesiology<br>Budelier, Thaddeus; Washington University School of Medicine in St. Louis, Anesthesiology<br>Helsten, Daniel; Washington University School of Medicine in St. Louis, Anesthesiology<br>Wildes, Troy; Washington University in Saint Louis School of Medicine, Anesthesiology<br>Sharma, Anshuman; Washington University School of Medicine in St. Louis, Anesthesiology<br>Avidan, Michael; Washington University School of Medicine, Anesthesiology |
| <b>Primary Subject Heading</b>: | Anaesthesia                                                                                                                                                                                                                                                                                                                                                                                                                                                                                                                                                                                                                                                                                                                                                                                                                                                                                                                                                                                                                                                                                   |
| Secondary Subject Heading:      | Health informatics                                                                                                                                                                                                                                                                                                                                                                                                                                                                                                                                                                                                                                                                                                                                                                                                                                                                                                                                                                                                                                                                            |
| Keywords:                       | Adult anaesthesia < ANAESTHETICS, Information technology < BIOTECHNOLOGY & BIOINFORMATICS, Health informatics < BIOTECHNOLOGY & BIOINFORMATICS                                                                                                                                                                                                                                                                                                                                                                                                                                                                                                                                                                                                                                                                                                                                                                                                                                                                                                                                                |
|                                 |                                                                                                                                                                                                                                                                                                                                                                                                                                                                                                                                                                                                                                                                                                                                                                                                                                                                                                                                                                                                                                                                                               |

SCHOLARONE™  
Manuscripts

1  
2  
3 **Protocol for a Retrospective Study Using Machine Learning Techniques to Develop Forecasting**

4  
5 **Algorithms for Postoperative Complications: The ACTFAST-2 Study**

6  
7  
8  
9  
10  
11 Bradley A Fritz, MD, Resident Physician<sup>1</sup>

12  
13  
14 Yixin Chen, PhD, Professor<sup>2</sup>

15  
16  
17 Teresa M Murray-Torres, MD, Resident Physician<sup>1</sup>

18  
19  
20 Stephen Gregory, MD, Instructor<sup>1</sup>

21  
22  
23 Arbi Ben Abdallah, PhD, Assistant Professor<sup>1</sup>

24  
25  
26 Alex Kronzer, Database Analyst<sup>1</sup>

27  
28  
29 Sherry McKinnon, Project Manager<sup>1</sup>

30  
31  
32 Thaddeus Budelier, Research Coordinator<sup>1</sup>

33  
34  
35 Daniel L Helsten, MD, Associate Professor<sup>1</sup>

36  
37  
38 Troy S Wildes, MD, Associate Professor<sup>1</sup>

39  
40  
41 Anshuman Sharma, MD, Professor<sup>1</sup>

42  
43  
44 Michael S Avidan, MBBCh, Professor<sup>1</sup>

45  
46  
47  
48  
49  
50  
51 1 – Department of Anesthesiology, Washington University in St. Louis, St. Louis, MO, USA

1  
2  
3 2 – Department of Computer Science and Engineering, Washington University in St. Louis, St. Louis, MO,  
4  
5 USA  
6  
7  
8  
9  
10

11 Corresponding Author: Bradley Fritz  
12  
13

14 1 Barnes Jewish Hospital Plaza  
15  
16

17 St. Louis, MO, 63108  
18  
19

20 (314) 747-4155  
21  
22

23 bafritz@wustl.edu  
24  
25  
26  
27  
28  
29  
30  
31  
32  
33  
34  
35  
36  
37  
38  
39  
40  
41  
42  
43  
44  
45  
46  
47  
48  
49  
50  
51  
52  
53  
54  
55  
56  
57  
58  
59  
60

## ABSTRACT

**Introduction** – Mortality and morbidity following surgery are pressing public health concerns in the United States. Traditional prediction models for postoperative adverse outcomes demonstrate good discrimination at the population level, but the ability to forecast an individual patient’s trajectory in real time remains poor. We propose to apply machine-learning techniques to perioperative time-series data to develop algorithms for predicting adverse perioperative outcomes.

**Methods and Analysis** – This study will include all adult patients who had surgery at our tertiary care hospital over a four-year period. Patient history, laboratory values, minute-by-minute intraoperative vital signs, and medications administered will be extracted from the electronic medical record. Outcomes will include in-hospital mortality, postoperative acute kidney injury, and postoperative respiratory failure. Forecasting algorithms for each of these outcomes will be constructed using density-based logistic regression after employing a Nadaraya-Watson kernel density estimator. Time-series variables will be analyzed using first- and second-order feature extraction, shapelet methods, and convolutional neural networks. The algorithms will be validated through measurement of precision and recall.

**Ethics and Dissemination** – This study has been approved by the Human Research Protection Office at Washington University in St. Louis. The successful development of these forecasting algorithms will allow perioperative health care clinicians to predict more accurately an individual patient’s risk for specific adverse perioperative outcomes in real time. Knowledge of a patient’s dynamic risk profile may allow clinicians to make targeted changes in the care plan that will alter the patient’s outcome trajectory. This hypothesis will be tested in a future randomized controlled trial.



### STRENGTHS AND LIMITATIONS OF THIS STUDY

- Will utilize modeling techniques that take advantage of the rich time-series data that are available, rather than data from a single time point
- Will utilize efficient modeling techniques that can process large amounts of data quickly
- Will utilize group-based learning to increase model accuracy by separating groups of patients who likely have different relationship between underlying features and predicted outcomes
- Dissemination to other health care facilities may be limited by the availability of high-quality preoperative and intraoperative input data in a usable format

## INTRODUCTION

An estimated 40 million people undergo surgery every year in the United States. Postoperative mortality rate at one year for surgical inpatients is between 5 and 10 percent,(1, 2) and an estimated 10 percent of surgical patients suffer major in-hospital morbidity.(3-8) Perioperative morbidity and mortality are therefore pressing public health concerns. Many patient characteristics, including comorbid medical conditions, associate strongly and independently with perioperative mortality and major morbidity.(1, 2, 9-11) While many of these characteristics are not modifiable, some perioperative risk factors, such as intraoperative blood pressures and anesthetic concentrations,(1, 2, 9, 10) can be modified in real time. Although the association between perioperative variables and postoperative outcomes has been well established at the population level using approaches such as standard logistic regression, (1, 2, 9, 10, 12) the ability to utilize deviations in physiological parameters in real time to dynamically forecast the trajectory of each individual patient remains poor.

There is a gap in the field with an opportunity to assess the potential utility of machine learning-based forecasting algorithms to anticipate adverse perioperative outcomes, guide interventions, and improve overall quality of care. Standard forecasting models, such as logistic regression, linear regression, and other statistical modeling procedures, have long been used to identify and prioritize risk factors for adverse outcomes. Although most of these statistical techniques have been shown to have moderate predictive values, they are limited in their prognostic ability and practical use.(1, 2, 6, 9, 10) In contrast to standard forecasting models, we have demonstrated machine learning and data mining approaches for patients on intensive care units that generate markedly superior prediction for outcomes such as mortality.(13) Our methods differ from standard statistical techniques in their ability to effectively incorporate time-series data. Most standard modeling techniques for surgical patients are based on a snapshot scheme, which only considers the data values at a given moment. They are not

1  
2  
3 competent in extracting features from time-series data, especially in real-time fashion, such as temporal  
4 trends and shapes. Therefore, the objective of this study is to utilize machine-learning techniques to  
5 build forecasting algorithms that use patient characteristics and high-fidelity intraoperative time-series  
6 data to predict adverse perioperative outcomes.  
7  
8  
9  
10  
11  
12  
13  
14  
15  
16  
17  
18  
19  
20  
21  
22  
23  
24  
25  
26  
27  
28  
29  
30  
31  
32  
33  
34  
35  
36  
37  
38  
39  
40  
41  
42  
43  
44  
45  
46  
47  
48  
49  
50  
51  
52  
53  
54  
55  
56  
57  
58  
59  
60

For peer review only

## METHODS AND ANALYSIS

### *Study Design*

Our central hypothesis is that with sufficient knowledge of patient characteristics coupled with repeated, high-fidelity time series data from the perioperative electronic medical record, advanced models can be constructed for individual patients that will forecast adverse perioperative outcomes. To test this hypothesis, we will conduct an observational cohort study of adult patients who undergo surgery at Barnes-Jewish Hospital in St. Louis, Missouri. First, we plan to develop forecasting algorithms for specific adverse perioperative outcomes using historical data. Next, we plan to validate these algorithms by determining whether they can be used to reliably forecast individual adverse perioperative outcomes.

### *Patient Population and Sample Size*

This study will include all adult patients who had surgery in the 48 operating rooms at Barnes-Jewish Hospital in St. Louis, Missouri between June 1, 2012 and August 31, 2016. Patients who receive anesthesia care in areas outside the main operating rooms, such as the obstetric suite or the outpatient surgery suite, will not be included. Barnes-Jewish Hospital is a 1,252-bed academic university-affiliated adult tertiary care hospital, performing approximately 19,000 surgeries a year. We therefore anticipate that gathering data from a 4.25-year period will lead to a total sample size of approximately 80,000-81,000 surgeries for algorithm development and validation.

The Human Research Protection Office at Washington University in St. Louis has granted a waiver of informed consent for all subjects enrolled in this study. This study has been determined to involve no more than minimal risk to participants, as no additional data will be collected beyond that already contained in the electronic record. For the same reason, the waiver of consent will not adversely

1  
2  
3 affect the participants' rights and welfare. It is impracticable to conduct this research without a waiver  
4  
5 of consent because 100% participation from the patients is imperative to obtain scientifically sound  
6  
7 data.  
8  
9

### 10 **Data Acquisition**

11  
12  
13  
14 For this project, we will use a variety of electronic medical record sources to cover the entire  
15  
16 perioperative period. Much of the relevant information will be imported from MetaVision®(iMDsoft,  
17  
18 Wakefield, MA), an anesthesiology information management software system that is the perioperative  
19  
20 electronic clinical documentation system currently utilized by the Department of Anesthesiology.  
21  
22 MetaVision® captures comprehensive clinical data beginning with the preoperative assessment and  
23  
24 continuing throughout the duration of the perioperative period. Information captured preoperatively  
25  
26 includes patients' past medical and surgical histories, chronic medical issues, medications used, and  
27  
28 functional capacity. Intraoperatively, minute-by-minute vital signs are captured, in addition to fluid  
29  
30 balances, ventilator parameters, and anesthetic medications administered. Blood pressure  
31  
32 measurements are available at intervals ranging from once per minute to once every five minutes, while  
33  
34 other vital signs are captured once per minute. Thus, a three-hour procedure would have about 180  
35  
36 measurements for each vital sign. All data fields are alphanumeric and are captured in a uniform and  
37  
38 granular manner allowing for easy coding and data analysis. Reports from MetaVision® are commonly  
39  
40 used to support many patient safety and quality improvement initiatives in addition to numerous  
41  
42 research studies.  
43  
44  
45  
46  
47

48 Postoperative outcome data will be obtained from Sunrise Clinical Manager (Allscripts, Chicago,  
49  
50 IL), the electronic medical record currently used for inpatient care at Barnes-Jewish Hospital. Data will  
51  
52 also be obtained from several registries, including the Systematic Assessment and Targeted  
53  
54 Improvement of Services Following Yearlong Surgical Outcomes Surveys (SATISFY-SOS) patient-reported  
55  
56  
57  
58  
59  
60

1  
2  
3 outcomes registry (NCT02032030), the National Surgical Quality Improvement Program (NSQIP)  
4  
5 database, the Society of Thoracic Surgeons (STS) database. Preoperative and postoperative laboratory  
6  
7 values will be obtained from the Center for Biomedical Informatics at Washington University, which  
8  
9 hosts the data repository where these data are stored once they are processed by the laboratory. In  
10  
11 general, a preoperative complete blood count is available if the patient is undergoing major surgery with  
12  
13 potential significant blood loss or if other clinical reasons are present. Electrolytes and renal function  
14  
15 are available if there is clinical reason to suspect an abnormality (including, but not limited to, patients  
16  
17 with hypertension, diabetes mellitus, or chronic kidney disease). Additional tests, such as hepatic  
18  
19 function and coagulation studies, are available on smaller sets of patients in whom the tests are  
20  
21 clinically indicated. A data dictionary has been included as supplementary files (Data Dictionary v4 Tab1,  
22  
23 Tab2, Tab3, and Tab4) detailing all the data elements that will be captured for this study.  
24  
25  
26  
27

28  
29 The specific outcomes that will be predicted by the forecasting algorithms will include in-  
30  
31 hospital mortality, postoperative acute kidney injury, and postoperative respiratory failure. In-hospital  
32  
33 mortality will be ascertained from Sunrise Clinical Manager. Postoperative acute renal failure will be  
34  
35 defined according to the KDIGO criteria(14): an increase in serum creatinine of 0.3 mg/dL, increase in  
36  
37 serum creatinine to 1.5 times the baseline value, or initiation of renal replacement therapy within 48  
38  
39 hours of surgery end time. Patients receiving renal replacement therapy prior to surgery, patients with  
40  
41 no baseline creatinine available within 30 days prior to surgery, and patients undergoing kidney  
42  
43 transplant or dialysis access procedures will be excluded from analysis of this outcome. Postoperative  
44  
45 respiratory failure will be defined as mechanical ventilation for greater than 48 hours or unplanned  
46  
47 postoperative intubation within 48 hours. These events will be extracted from clinical documentation  
48  
49 recorded by respiratory therapists in Sunrise Clinical Manager. Patients receiving mechanical ventilation  
50  
51 prior to surgery will be excluded from analysis of this outcome.  
52  
53  
54  
55  
56  
57  
58  
59  
60

### ***Data Analysis, Part 1 – Forecasting Algorithm Development***

We will develop hybrid learning techniques to combine the strength of generative models such as histogram and kernel density estimation and discriminative models such as support vector machines, logistic regressions, and kernel machines to improve predictions of adverse perioperative outcomes (in-hospital mortality, postoperative acute renal failure, postoperative respiratory failure). The goal is to deliver superior prediction quality with good interpretability and high computational efficiency that supports fast processing of big data. Based on our preliminary work using density-based logistic regression (DLR) to develop an early clinical deterioration warning system for patients in the general wards of Barnes-Jewish Hospital,(15, 16) we propose to develop novel hybrid data mining/machine learning algorithms that exploit both non-parametric and parametric techniques. For each target outcome, we plan to develop a model that will predict the likelihood of the postoperative outcome in real time using preoperative features and time-series data from the preceding 60 minutes.

DLR first applies a Nadaraya-Watson kernel density estimator, a non-parametric transformation, on the input data to extract features that conform best to the true distribution of data, and then applies the parametric logistic regression model on the transformed features. The resulting model exhibits five desirable properties: nonlinear separation ability, high efficiency, good interpretability, ability to handle mixed data types including numerical and categorical ones, and support for multi-way classification. Our previous results using Barnes-Jewish Hospital clinical data showed that DLR achieves better classification accuracy than state-of-the-art nonlinear classifiers such as support vector machines and kernel logistic regression but is also much more efficient than nonlinear models.(17) In fact, DLR has the same asymptotic complexity as linear classifiers and can scale up to very large datasets in practice.(17)

To analyze the collected time-series data, we need to extract features that capture temporal patterns, such as a rapid temperature increases or abnormal heart rate fluctuations. To make

1  
2  
3 predictions at a given point in time, time-series values from the preceding 60 minutes will be used.  
4  
5 Missing values will be handled using linear interpolation. We will first extract a large pool of time-series  
6  
7 features including: first-order features such as variance, skewness, and kurtosis, and second-order  
8  
9 features such as energy, entropy, correlation, inertia, and local homogeneity.(18, 19) The second-order  
10  
11 features are known to be robust under noises.(20, 21) Self-similarity is widely observed in human  
12  
13 physiological signs. Detrended fluctuation analysis (22) measures the degree of self-similarity in time  
14  
15 series and has been applied to analyze heartbeat and oxygen levels.(23) Approximate entropy measures  
16  
17 the degree of unpredictability in a time series.(24) Spectral analysis has also been used to analyze  
18  
19 clinical time-series.(22) We will also consider cross-sign features including correlation,(25)  
20  
21 coherence,(25) lagged regression, nonlinear regression,(19) and the synchronization index.(26) We will  
22  
23 also extract features based on the bag-of-patterns approach(27-29) and autocorrelation.(30-32) In  
24  
25 addition, we will also generate features based on shapelets.(33) A shapelet is a subseries that is used to  
26  
27 compare against each time-series. For a shapelet with length  $l$  and a time series  $T$ , the shapelet gives a  
28  
29 feature value which is the minimum Euclidean distance between the shapelet and any subseries of  $T$   
30  
31 with length  $l$ . Efficient methods have been developed to find good shapelets, based on length estimation  
32  
33 and optimized search.(34-36)

34  
35  
36  
37  
38  
39  
40 We will also develop a novel deep learning method to extract more robust features from time-  
41  
42 series. A leading method for feature selection from time series has been the shapelet method. However,  
43  
44 we have shown that deep learning methods can significantly improve over shapelet. Deep learning  
45  
46 methods, especially those using convolutional neural networks (CNNs),(37) have achieved great success  
47  
48 in learning useful representations (features) from images.(38, 39) However, its uses in time-series  
49  
50 classification are very limited. We plan to apply CNNs to time-series data to generate good  
51  
52 representations. We note that the convolutional layers in CNNs can be viewed as a collection of local  
53  
54 filters over the input space; the filters' weights are learnt through back propagation. The filters in CNNs  
55  
56  
57  
58  
59



1  
2  
3 regulate the time series in different frequency bands, and the dot product operations in the CNNs  
4  
5 measure distances between two subseries. Thus, CNNs can be viewed as a more general framework  
6  
7 than shapelet learning which can adaptively find the suitable down-sampling rates and scales of the  
8  
9 shapelets.  
10

11  
12  
13 Our preliminary work has shown that it is beneficial to use a large feature set: the modeling  
14  
15 accuracy increases as more features are used and the top features in the final model include features  
16  
17 from different categories.(23) With the above features, we will address overfitting. An overfit model  
18  
19 will generally have poor predictive performance and interpretability. We will investigate three schemes  
20  
21 to avoid over-fitting including: 1) using feature selection methods, such as forward feature selection  
22  
23 based on F-score or area-under-curve score,(40) to find the most discriminative features; 2) adding  
24  
25 regularization terms (such as L1,(41) L2,(42) Akaike information criterion, Bayesian information  
26  
27 criterion,(43) minimum description length,(44) or a probabilistic prior) to the optimization objective; and  
28  
29 3) using meta-techniques such as bootstrap aggregation (45) and exploratory undersampling (46) to  
30  
31 further address overfitting and class imbalance.  
32  
33  
34  
35

36 We plan to use bin-based kernel density estimation, another non-parametric technique, to  
37  
38 process the input features in each dimension. In previously described DLR, we use the Nadaraya-  
39  
40 Watson kernel density estimator for each data point in each dimension, which has time complexity of  
41  
42  $O(mN^2)$  where  $m$  is the number of dimensions and  $N$  is the number of data points. Therefore, it is still  
43  
44 slow for big datasets with a large  $N$ . Bin-based kernel density estimation differs from the Nadaraya-  
45  
46 Watson kernel density estimator in that we divide each dimension into equal-sized bins and estimate  
47  
48 the density for each bin instead of each data point. This will reduce the time into  $O(mB^2)$  where  $B \ll N$  is  
49  
50 the number of bins. Note that instead of using a simple histogram count for each bin, we will use a  
51  
52 Gaussian kernel function to smooth the density estimation across bins. The time complexity can be  
53  
54  
55  
56  
57  
58  
59  
60

1  
2  
3 further reduced to  $O(mB)$  using techniques such as Gauss transformation.(47) Such dramatic reduction  
4  
5 of computing time will enable us to process large datasets and perform quick model-building. We will  
6  
7 also combine the kernel density estimator-based features with other parametric models such as Cox  
8  
9 regression.  
10

11  
12  
13 We will leverage a hierarchical optimization algorithm for training DLR,(17) which automatically  
14  
15 learns free parameters in the model under a maximum likelihood framework. This optimization  
16  
17 formulation not only learns the coefficients in the model, but also provides a way to automatically select  
18  
19 the kernel bandwidth in the Nadaraya-Watson estimator or the bin size in the bin-based kernel density  
20  
21 estimation, which is absent in previous work. We will also employ techniques including stochastic  
22  
23 gradient descent (48) and its parallelized implementation (49) to further enhance the scalability of the  
24  
25 training algorithm.  
26  
27

28  
29 Our algorithm will utilize group-based modeling. The idea is to first use a few key features to  
30  
31 divide the patients into some major categories, and then train a separate classifier for each category.  
32  
33 The intuition is that from clinical knowledge, we know that some different groups of patients have  
34  
35 drastically different behaviors and should correspond to different statistical models. Mixing such vastly  
36  
37 different groups together to train a single model may not give the best result. Therefore, it is  
38  
39 instrumental to identify important sub-populations of patients, before we use sophisticated hybrid  
40  
41 algorithms to accurately model the patients in each group. For a simple example, we can group the  
42  
43 patients into a few age ranges, e.g., <45, 45-55, 56-65, etc. Although age can be used as a feature in a  
44  
45 single classifier for all patients, such explicit division leads to multiple, more specific classifiers. It can be  
46  
47 viewed as a hybrid algorithm combining a decision tree with other classifiers. We may also use metrics  
48  
49 defined on multiple attributes to group the patients. Features that will be used as classifiers will include  
50  
51 age, sex, and surgery type (cardiac versus non-cardiac). To systematically integrate such clinical  
52  
53  
54  
55  
56  
57  
58  
59  
60

1  
2  
3 knowledge into modeling, we plan to study hybrid models that are mixture of two or more classifiers.  
4  
5 For example, we can construct a global decision tree whose nodes denote patient groups, where each  
6  
7 group is modeled by a local classifier such as DLR. Different nodes may use different types of classifiers.  
8  
9  
10 Previous work on a similar idea has demonstrated improved performance (50) in an intensive care  
11  
12 prognosis application.  
13

### 14 15 ***Data Analysis, Part 2 – Forecasting Algorithm Validation*** 16

17  
18 After algorithm development, the forecasting algorithms will be tested for accuracy of their  
19  
20 predictive performances in two ways. First, algorithm validity will be tested within the historical  
21  
22 database by dividing the database into training, validation, and testing datasets. Second, the  
23  
24 performance of the developed algorithms will be additionally validated prospectively (out-of-sample  
25  
26 performance), using precision and recall.  
27  
28

29  
30 For initial model training and validation, the historical database will be divided into a training  
31  
32 dataset (60% of the database), a validation dataset (20% of the database), and a testing dataset (20% of  
33  
34 the database). Each training, validation, or testing example will be a 60-minute epoch randomly  
35  
36 selected from a single surgery. More than one epoch from the same surgery may be included if the  
37  
38 surgery lasted long enough to generate more than one distinct 60-minute epoch. However, all epochs  
39  
40 from the same surgery will be included either all in the training dataset, all in the validation dataset, or  
41  
42 all in the testing dataset. Because we expect that our target outcomes will be relatively rare events,  
43  
44 overall classification accuracy is not likely to be a useful measure of model performance. Instead, we  
45  
46 will use precision (true positives/[true positives + false positives]) and recall (true positives/[true  
47  
48 positives + false negatives]). We will optimize model parameters using the training dataset. Then we  
49  
50 will pre-specify our desired recall and use the validation dataset to select the decision threshold that  
51  
52 leads to the highest precision without sacrificing our desired recall. Then we will apply our model to the  
53  
54  
55  
56  
57  
58  
59  
60

1  
2  
3 testing dataset and report the observed precision and recall. The overall flow of algorithm training and  
4  
5 validation is outlined in Figure 1.  
6  
7

8  
9 Additionally, we propose to perform a validation test of the predictive performance of the  
10 developed algorithms prospectively, using patient records that did not belong to the learning database.  
11 For this evaluation, we will apply our model to the prospectively-collected data. We will report the  
12  
13 observed precision and recall as measures of model performance.  
14  
15  
16  
17

### 18 ***Prespecified Secondary Analyses***

19  
20  
21 In addition to the primary algorithms described above (in-hospital mortality, postoperative  
22 acute kidney injury, and postoperative respiratory failure), we anticipate using the acquired data to  
23  
24 develop prediction algorithms for additional outcomes. These outcomes are outlined in Table 1.  
25  
26  
27  
28

29 **Table 1. Prespecified Secondary Outcomes**

| Data Source                                                    | Outcome                                                                                                                                                                                                                                                                              |
|----------------------------------------------------------------|--------------------------------------------------------------------------------------------------------------------------------------------------------------------------------------------------------------------------------------------------------------------------------------|
| Sunrise Clinical Manager                                       | <ul style="list-style-type: none"> <li>- Thirty-day hospital readmission</li> <li>- Intensive care unit admission</li> <li>- Postoperative delirium</li> </ul>                                                                                                                       |
| National Surgical Quality Improvement Program (NSQIP) database | <ul style="list-style-type: none"> <li>- Thirty-day mortality</li> <li>- Thirty-day hospital readmission</li> <li>- Unplanned intubation</li> <li>- Postoperative sepsis</li> <li>- Postoperative myocardial infarction</li> <li>- Postoperative cerebrovascular accident</li> </ul> |

|                                              |                                                                                                                                                                                                                                                                                                                                                                                                                                                                                                                                                                                                                                                                                                                                                                                                                                                                                                        |
|----------------------------------------------|--------------------------------------------------------------------------------------------------------------------------------------------------------------------------------------------------------------------------------------------------------------------------------------------------------------------------------------------------------------------------------------------------------------------------------------------------------------------------------------------------------------------------------------------------------------------------------------------------------------------------------------------------------------------------------------------------------------------------------------------------------------------------------------------------------------------------------------------------------------------------------------------------------|
|                                              | <ul style="list-style-type: none"> <li>- Postoperative pulmonary embolism</li> <li>- Postoperative deep vein thrombosis</li> <li>- Postoperative cardiac arrest requiring cardiopulmonary resuscitation</li> </ul>                                                                                                                                                                                                                                                                                                                                                                                                                                                                                                                                                                                                                                                                                     |
| <p>Society of Thoracic Surgeons database</p> | <ul style="list-style-type: none"> <li>- Thirty-day mortality</li> <li>- Thirty-day hospital readmission</li> <li>- Postoperative atrial fibrillation</li> <li>- Postoperative venous thromboembolism</li> <li>- Postoperative acute respiratory distress syndrome</li> </ul>                                                                                                                                                                                                                                                                                                                                                                                                                                                                                                                                                                                                                          |
| <p>SATISFY-SOS registry</p>                  | <ul style="list-style-type: none"> <li>- Patient-reported thirty-day readmission</li> <li>- Patient-reported postoperative myocardial infarction</li> <li>- Patient-reported postoperative cardiac arrest</li> <li>- Patient-reported postoperative heart failure</li> <li>- Patient-reported postoperative cerebrovascular accident</li> <li>- Patient-reported postoperative venous thromboembolism</li> <li>- Patient-reported postoperative respiratory arrest</li> <li>- Patient-reported postoperative pneumonia</li> <li>- Patient-reported severe postoperative pain lasting greater than one day</li> <li>- Patient-reported severe postoperative nausea and vomiting lasting greater than one day</li> <li>- Return to work 30 days after surgery</li> <li>- Quality of life 30 days after surgery</li> <li>- Ability to perform activities of daily living 30 days after surgery</li> </ul> |

1  
2  
3  
4  
5  
6  
7  
8  
9  
10  
11  
12  
13  
14  
15  
16  
17  
18  
19  
20  
21  
22  
23  
24  
25  
26  
27  
28  
29  
30  
31  
32  
33  
34  
35  
36  
37  
38  
39  
40  
41  
42  
43  
44  
45  
46  
47  
48  
49  
50  
51  
52  
53  
54  
55  
56  
57  
58  
59  
60

For peer review only

## DISCUSSION

### *Implications and Future Directions*

We anticipate that the successful development of machine learning-based algorithms for predicting adverse postoperative outcomes will impact the perioperative care of surgical patients in important ways. Because our algorithms will utilize time-series data, we expect to be able to use them in real time to provide perioperative health care clinicians with dynamic predictions of their patients' risks for specific adverse outcomes. Because the features in our models will include modifiable risk factors such as blood pressure and concentrations of anesthetic agents, we believe clinicians will be able to make changes that may alter their patients' risk trajectories. The models may also help clinicians make decisions regarding their patients' postoperative disposition (intensive care unit versus hospital ward; inpatient admission versus discharge). To be feasible and efficient, we suggest that the forecasting algorithms could be incorporated into a telemedicine paradigm, such as an anesthesiology control tower for a perioperative suite. Once the forecasting algorithms are developed, we intend to conduct a randomized controlled trial to investigate whether implementation of the algorithms in the operating rooms leads to a reduction in the incidence of adverse postoperative outcomes. The incorporation of machine-learning forecasting algorithms into perioperative care will complement the expertise of clinicians, and has the potential to increase both safety and efficiency.

### *Strengths and Limitations*

One of the greatest strengths of this project is the novel use of machine learning techniques to harness the abundant data in the perioperative electronic medical record. Unlike traditional risk prediction models, which utilize data from a single time point and therefore incorporate only a small fraction of the available information about the patient, our algorithms will take advantage of the rich time-series data generated in the operating rooms and, more broadly, in perioperative settings (e.g.,

1  
2  
3 preoperative assessment clinic, postoperative recovery area). Another strength is the efficiency of the  
4 proposed modeling techniques, which will need to quickly process large amounts of data. The use of  
5 group-based learning will increase the accuracy of the derived models by separating groups of patients  
6 who likely have different relationships between underlying features and the predicted outcomes.  
7  
8  
9

10  
11  
12  
13 This project does have limitations that should be noted. Because the forecasting algorithms will  
14 utilize large quantities of data, generalizability of the results and implementation of the algorithms at  
15 other health care facilities will depend upon the availability of high-quality input data. In particular, the  
16 preoperative evaluation and medical history may not be documented in an electronic format with  
17 discrete analyzable fields at some other institutions. Even when such data are available, differences in  
18 formatting will require caution during implementation at other hospitals.  
19  
20  
21  
22  
23  
24  
25  
26

### 27 ***Ethics and Dissemination***

28  
29  
30 This study has been approved by the Human Research Protection Office at Washington  
31 University in St. Louis. As noted earlier in this document, a waiver of informed consent has been  
32 granted for all participants. This work will be funded largely by a grant from the National Science  
33 Foundation (award number 1622678) and from a grant from the Agency for Healthcare Research and  
34 Quality (R21 HS24581-01).  
35  
36  
37  
38  
39  
40  
41

42 Once this investigation has been completed, we intend to publish the results in a peer-reviewed  
43 publication. We also intend to present the results of this work at professional conferences for both the  
44 anesthesiology and computer science communities. In accordance with the recent proposal from the  
45 International Committee of Medical Journal Editors, patient-level data will be made available within six  
46 months after publication of the primary manuscript.<sup>(51)</sup> Data will be provided to researchers who  
47 submit a methodologically sound research proposal including a protocol and statistical analysis plan. No  
48 patient-identifying fields (including dates) will be included in the shared dataset. Age will be provided in  
49  
50  
51  
52  
53  
54  
55  
56  
57  
58  
59  
60



1  
2  
3 years, unless the patient is older than 89 years. In this case, age will be reported as ">89 years." Any  
4  
5 dates will be presented as "number of days since index surgery."  
6  
7  
8  
9  
10  
11  
12  
13  
14  
15  
16  
17  
18  
19  
20  
21  
22  
23  
24  
25  
26  
27  
28  
29  
30  
31  
32  
33  
34  
35  
36  
37  
38  
39  
40  
41  
42  
43  
44  
45  
46  
47  
48  
49  
50  
51  
52  
53  
54  
55  
56  
57  
58  
59  
60

For peer review only

## REFERENCES

1. Kertai MD, Pal N, Palanca BJ, Lin N, Searleman SA, Zhang L, et al. Association of perioperative risk factors and cumulative duration of low bispectral index with intermediate-term mortality after cardiac surgery in the B-Unaware Trial. *Anesthesiology*. 2010;112(5):1116-27.
2. Kertai MD, Palanca BJ, Pal N, Burnside BA, Zhang L, Sadiq F, et al. Bispectral index monitoring, duration of bispectral index below 45, patient risk factors, and intermediate-term mortality after noncardiac surgery in the B-Unaware Trial. *Anesthesiology*. 2011;114(3):545-56.
3. Walsh M, Devereaux PJ, Garg AX, Kurz A, Turan A, Rodseth RN, et al. Relationship between intraoperative mean arterial pressure and clinical outcomes after noncardiac surgery: toward an empirical definition of hypotension. *Anesthesiology*. 2013;119(3):507-15.
4. Walsh M, Garg AX, Devereaux PJ, Argalious M, Honar H, Sessler DI. The association between perioperative hemoglobin and acute kidney injury in patients having noncardiac surgery. *Anesthesia and analgesia*. 2013;117(4):924-31.
5. Devereaux PJ, Yang H, Yusuf S, Guyatt G, Leslie K, Villar JC, et al. Effects of extended-release metoprolol succinate in patients undergoing non-cardiac surgery (POISE trial): a randomised controlled trial. *Lancet*. 2008;371(9627):1839-47.
6. Kheterpal S, Tremper KK, Englesbe MJ, O'Reilly M, Shanks AM, Fetterman DM, et al. Predictors of postoperative acute renal failure after noncardiac surgery in patients with previously normal renal function. *Anesthesiology*. 2007;107(6):892-902.
7. Sharifpour M, Moore LE, Shanks AM, Didier TJ, Kheterpal S, Mashour GA. Incidence, predictors, and outcomes of perioperative stroke in noncarotid major vascular surgery. *Anesthesia and analgesia*. 2013;116(2):424-34.
8. Bhavne PD, Goldman LE, Vittinghoff E, Maselli J, Auerbach A. Incidence, predictors, and outcomes associated with postoperative atrial fibrillation after major noncardiac surgery. *American heart journal*. 2012;164(6):918-24.
9. Willingham MD, Karren E, Shanks AM, O'Connor MF, Jacobsohn E, Kheterpal S, et al. Concurrence of Intraoperative Hypotension, Low Minimum Alveolar Concentration, and Low Bispectral Index Is Associated with Postoperative Death. *Anesthesiology*. 2015;123(4):775-85.
10. Willingham M, Ben Abdallah A, Gradwohl S, Helsten D, Lin N, Villafranca A, et al. Association between intraoperative electroencephalographic suppression and postoperative mortality. *British journal of anaesthesia*. 2014;113(6):1001-8.
11. Aranake A, Gradwohl S, Ben-Abdallah A, Lin N, Shanks A, Helsten DL, et al. Increased risk of intraoperative awareness in patients with a history of awareness. *Anesthesiology*. 2013;119(6):1275-83.
12. Sessler DI, Sigl JC, Kelley SD, Chamoun NG, Manberg PJ, Saager L, et al. Hospital stay and mortality are increased in patients having a "triple low" of low blood pressure, low bispectral index, and low minimum alveolar concentration of volatile anesthesia. *Anesthesiology*. 2012;116(6):1195-203.
13. Wang Y, Chen W, Heard K, Kollef MH, Bailey TC, Cui Z, et al. Mortality Prediction in ICUs Using A Novel Time-Slicing Cox Regression Method. *AMIA Annual Symposium proceedings / AMIA Symposium AMIA Symposium*. 2015;2015:1289-95.
14. Kellum JA, Lameire N. Diagnosis, evaluation, and management of acute kidney injury: a KDIGO summary (Part 1). *Critical care*. 2013;17(1):1.
15. Hackmann G, Chen M, Chipara O, Lu C, Chen Y, Kollef M, et al. Toward a two-tier clinical warning system for hospitalized patients. *AMIA Annual Symposium proceedings / AMIA Symposium AMIA Symposium*. 2011;2011:511-9.

16. Bailey TC, Chen Y, Mao Y, Lu C, Hackmann G, Micek ST, et al. A trial of a real-time alert for clinical deterioration in patients hospitalized on general medical wards. *Journal of hospital medicine : an official publication of the Society of Hospital Medicine*. 2013;8(5):236-42.
17. Chen W, Chen Y, Mao Y, Guo B, editors. Density-based logistic regression. *Proceedings of the 19th ACM SIGKDD international conference on Knowledge discovery and data mining; 2013: ACM*.
18. Dowdy S, Weardon S. *Statistics for Research*. Hoboken, NJ: Wiley; 1983.
19. George A, Wild C. *Nonlinear Regression*. Hoboken, NJ: Wiley; 2003.
20. Haralick RM, Shanmugam K. Textural features for image classification. *IEEE Transactions on systems, man, and cybernetics*. 1973(6):610-21.
21. Arthanari T, Dodge Y. *Mathematical Programming in Statistics*. Hoboken, NJ: Wiley; 1993.
22. Penzel T, Kantelhardt JW, Grote L, Peter JH, Bunde A. Comparison of detrended fluctuation analysis and spectral analysis for heart rate variability in sleep and sleep apnea. *IEEE transactions on bio-medical engineering*. 2003;50(10):1143-51.
23. Mao Y, Chen W, Chen Y, Lu C, Kollef M, Bailey T, editors. An integrated data mining approach to real-time clinical monitoring and deterioration warning. *Proceedings of the 18th ACM SIGKDD international conference on Knowledge discovery and data mining; 2012: ACM*.
24. Pincus SM. Approximate entropy as a measure of system complexity. *Proceedings of the National Academy of Sciences of the United States of America*. 1991;88(6):2297-301.
25. Loforte R, Carrault G, Mainardi L, Beuche A, editors. Heart rate and respiration relationships as a diagnostic tool for late onset sepsis in sick preterm infants. *2006 Computers in Cardiology; 2006: IEEE*.
26. Nollo G, Faes L, Pellegrini B, Porta A, Antolini R, editors. Synchronization index for quantifying nonlinear causal coupling between RR interval and systolic arterial pressure after myocardial infarction. *Computers in Cardiology 2000; 2000: IEEE*.
27. Lin J, Khade R, Li Y. Rotation-invariant similarity in time series using bag-of-patterns representation. *Journal of Intelligent Information Systems*. 2012;39(2):287-315.
28. Baydogan MG, Runger G, Tuv E. A bag-of-features framework to classify time series. *IEEE transactions on pattern analysis and machine intelligence*. 2013;35(11):2796-802.
29. Deng H, Runger G, Tuv E, Vladimir M. A time series forest for classification and feature extraction. *Information Sciences*. 2013;239:142-53.
30. Bagnall A, Davis LM, Hills J, Lines J, editors. *Transformation Based Ensembles for Time Series Classification*. SDM; 2012: SIAM.
31. Caiado J, Crato N, Peña D. A periodogram-based metric for time series classification. *Computational Statistics & Data Analysis*. 2006;50(10):2668-84.
32. Bagnall A, Janacek G. A run length transformation for discriminating between auto regressive time series. *Journal of classification*. 2014;31(2):154-78.
33. Ye L, Keogh E, editors. Time series shapelets: a new primitive for data mining. *Proceedings of the 15th ACM SIGKDD international conference on Knowledge discovery and data mining; 2009: ACM*.
34. Lines J, Davis LM, Hills J, Bagnall A, editors. A shapelet transform for time series classification. *Proceedings of the 18th ACM SIGKDD international conference on Knowledge discovery and data mining; 2012: ACM*.
35. Grabocka J, Schilling N, Wistuba M, Schmidt-Thieme L, editors. Learning time-series shapelets. *Proceedings of the 20th ACM SIGKDD international conference on Knowledge discovery and data mining; 2014: ACM*.
36. Rakthanmanon T, Keogh E, editors. Fast shapelets: A scalable algorithm for discovering time series shapelets. *Proceedings of the 13th SIAM international conference on data mining; 2013: SIAM*.
37. Fukushima K. Neocognitron: A self-organizing neural network model for a mechanism of pattern recognition unaffected by shift in position. *Biological cybernetics*. 1980;36(4):193-202.

- 1
- 2
- 3
- 4 38. Schroff F, Kalenichenko D, Philbin J, editors. Facenet: A unified embedding for face recognition
- 5 and clustering. Proceedings of the IEEE Conference on Computer Vision and Pattern Recognition; 2015.
- 6 39. He K, Zhang X, Ren S, Sun J, editors. Delving deep into rectifiers: Surpassing human-level
- 7 performance on imagenet classification. Proceedings of the IEEE International Conference on Computer
- 8 Vision; 2015.
- 9 40. Khosla A, Cao Y, Lin CC-Y, Chiu H-K, Hu J, Lee H, editors. An integrated machine learning
- 10 approach to stroke prediction. Proceedings of the 16th ACM SIGKDD international conference on
- 11 Knowledge discovery and data mining; 2010: ACM.
- 12 41. Shi J, Yin W, Osher S, Sajda P. A fast hybrid algorithm for large-scale l1-regularized logistic
- 13 regression. Journal of Machine Learning Research. 2010;11(Feb):713-41.
- 14 42. Moore RC, DeNero J. L1 and L2 regularization for multiclass hinge loss models. 2011.
- 15 43. Schwarz G. Estimating the dimension of a model. The annals of statistics. 1978;6(2):461-4.
- 16 44. Grünwald PD. The minimum description length principle: MIT press; 2007.
- 17 45. Breiman L. Bagging predictors. Machine learning. 1996;24(2):123-40.
- 18 46. Liu X-Y, Wu J, Zhou Z-H. Exploratory undersampling for class-imbalance learning. IEEE
- 19 Transactions on Systems, Man, and Cybernetics, Part B (Cybernetics). 2009;39(2):539-50.
- 20 47. Elgammal A, Duraiswami R, Davis LS. Efficient kernel density estimation using the fast gauss
- 21 transform with applications to color modeling and tracking. IEEE transactions on pattern analysis and
- 22 machine intelligence. 2003;25(11):1499-504.
- 23 48. Ferguson TS. An inconsistent maximum likelihood estimate. Journal of the American Statistical
- 24 Association. 1982;77(380):831-4.
- 25 49. Zinkevich M, Weimer M, Li L, Smola AJ, editors. Parallelized stochastic gradient descent.
- 26 Advances in neural information processing systems; 2010.
- 27 50. Abu-Hanna A, de Keizer N. Integrating classification trees with local logistic regression in
- 28 Intensive Care prognosis. Artificial Intelligence in Medicine. 2003;29(1):5-23.
- 29 51. Taichman DB, Backus J, Baethge C, Bauchner H, de Leeuw PW, Drazen JM, et al. Sharing Clinical
- 30 Trial Data--A Proposal from the International Committee of Medical Journal Editors. The New England
- 31 journal of medicine. 2016;374(4):384-6.
- 32
- 33
- 34
- 35
- 36
- 37
- 38
- 39
- 40
- 41
- 42
- 43
- 44
- 45
- 46
- 47
- 48
- 49
- 50
- 51
- 52
- 53
- 54
- 55
- 56
- 57
- 58
- 59
- 60

1  
2  
3 **FIGURE LEGEND**  
4  
5

6 **Figure 1.** Data flow for algorithm training and validation using the historical database.  
7  
8  
9  
10  
11  
12  
13  
14  
15  
16  
17  
18  
19  
20  
21  
22  
23  
24  
25  
26  
27  
28  
29  
30  
31  
32  
33  
34  
35  
36  
37  
38  
39  
40  
41  
42  
43  
44  
45  
46  
47  
48  
49  
50  
51  
52  
53  
54  
55  
56  
57  
58  
59  
60

**AUTHORS' CONTRIBUTIONS**

Bradley A Fritz, MD, contributed to overall study design, initial draft of protocol, and critical revision of protocol.

Yixin Chen, PhD, contributed to development of methods for creation of forecasting algorithms

Teresa M Murray-Torres, MD, contributed to study design and critical revision of protocol

Stephen Gregory, MD, contributed to study design and critical revision of protocol

Arbi Ben Abdallah, PhD, contributed to statistical methods for validation of forecasting algorithms and to critical revision of protocol

Alex Kronzer contributed to study design and critical revision of protocol

Sherry McKinnon contributed to study design and critical revision of protocol

Thaddeus Budelier contributed to critical revision of protocol

Daniel L Helsten, MD, contributed to critical revision of protocol

Troy S Wildes, MD, contributed to study design and critical revision of protocol

Anshuman Sharma, MD, contributed to study design and critical revision of protocol

Michael S Avidan, MBBCh, contributed to overall study design and critical revision of protocol

**FUNDING STATEMENT**

This work will be funded by a grant from the National Science Foundation (award number 1622678) and from a grant from the Agency for Healthcare Research and Quality (R21 HS24581-01).

**COMPETING INTERESTS STATEMENT**

All authors have completed the ICMJE uniform disclosure form at [www.icmje.org/coi\\_disclosure.pdf](http://www.icmje.org/coi_disclosure.pdf) and declare: all authors had financial support from the National Science Foundation and the Agency for Healthcare Research and Quality for the submitted work; no financial relationships with any organisations that might have an interest in the submitted work in the previous three years; no other relationships or activities that could appear to have influenced the submitted work."

1  
2  
3  
4  
5  
6  
7  
8  
9  
10  
11  
12  
13  
14  
15  
16  
17  
18  
19  
20  
21  
22  
23  
24  
25  
26  
27  
28  
29  
30  
31  
32  
33  
34  
35  
36  
37  
38  
39  
40  
41  
42  
43  
44  
45  
46  
47  
48  
49  
50  
51  
52  
53  
54  
55  
56  
57  
58  
59  
60

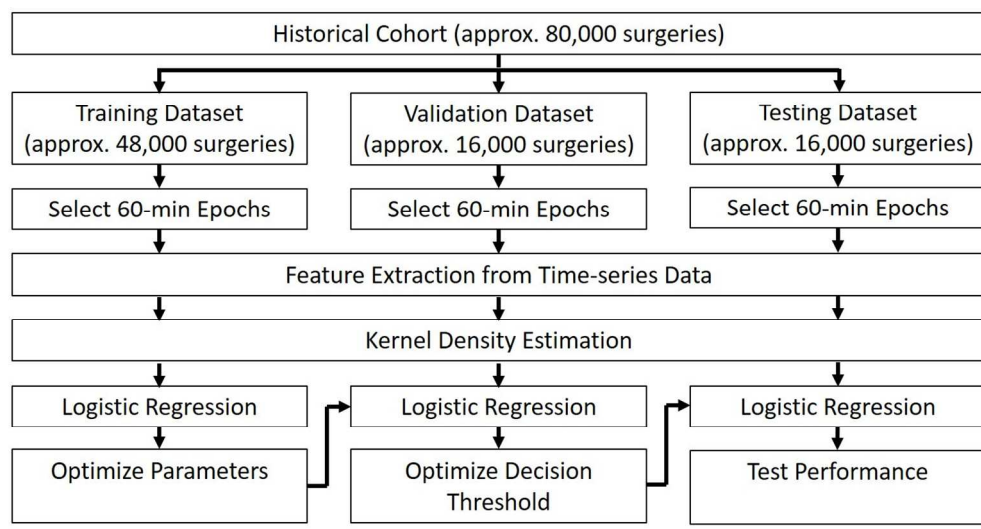

Figure 1. Data flow for algorithm training and validation using the historical database.

123x66mm (300 x 300 DPI)

review only



| Field               | Output             | Description                                             |
|---------------------|--------------------|---------------------------------------------------------|
| PatientID           |                    | Identifier                                              |
| Surg_Type           |                    | Text field                                              |
| Anesthesia_Type     |                    | 1 General                                               |
|                     |                    | 2 Block                                                 |
|                     |                    | 3 MAC                                                   |
|                     |                    | 4 Spinal                                                |
|                     |                    | 5 Epidural                                              |
|                     |                    | 6 CSE                                                   |
|                     |                    | 8 Cancelled Procedure                                   |
|                     |                    | 9 Cancelled Procedure after selected anesthesia type(s) |
|                     |                    | 10 converted to General                                 |
| SEX                 |                    | 1 Male                                                  |
|                     |                    | 2 Female                                                |
|                     |                    | 3 Unknown                                               |
| RACE                |                    | 5 Unknown                                               |
|                     |                    | 6 Hispanic                                              |
|                     |                    | 7 Black American                                        |
|                     |                    | 8 Other                                                 |
|                     |                    | 9 White                                                 |
|                     |                    | 10 American Indian                                      |
|                     |                    | 11 Asian                                                |
|                     |                    | 12 American Indian or Alaska Native                     |
|                     |                    | 13 Black or African American                            |
|                     |                    | 14 Native Hawaiian or other Pacific Islander            |
|                     |                    | 15 Some other Race                                      |
| HEIGHT              | Continuous         | CM                                                      |
| WEIGHT              | Continuous         | KG                                                      |
| Ideal_Body_Weight   | Continuous         | Ideal weight at designated height, sex, etc.            |
| BMI                 | Continuous         | Body Mass Index                                         |
| CCI                 | Integer score 0-41 | Charlson Comorbidity Index                              |
| FUNCTIONAL_CAPACITY |                    | 5 -                                                     |
|                     |                    | 6 >10 METs                                              |
|                     |                    | 7 6-10 METs                                             |

1  
2  
3  
4  
5  
6  
7  
8  
9  
10  
11  
12  
13  
14  
15  
16  
17  
18  
19  
20  
21  
22  
23  
24  
25  
26  
27  
28  
29  
30  
31  
32  
33  
34  
35  
36  
37  
38  
39  
40  
41  
42  
43  
44  
45  
46  
47

- 8 4-6 METS
- 9 <4 METS
- 10 Ambulates with assistance only
- 11 Cannot assess
- 1 1
- 2 2
- 3 3
- 4 4
- 5 5
- 6 1E
- 7 2E
- 8 3E
- 9 4E
- 10 5E
- 11 6
- 1 Patient has hypertension
- 1 Patient has coronary artery disease
- 1 Patient has previous Myocardial Infarction
- 1 Patient has congestive heart failure
- 20 normal
- 21 stage I - Impaired relaxation
- 22 stage II - Pseudonormal
- 23 stage III - Restrictive
- 24 unknown/unspecified
- 25 --
- 26 unspecified dysfunction
- 30 unknown
- 31 >70%
- 32 60-70%
- 33 50-60%
- 34 40-50%
- 35 30-40%
- 36 20-30%
- 37 10-20%

ASA

HTN

CAD

CAD\_PRIORMI

CHF

CHF\_Diastolic\_Function

LVEF

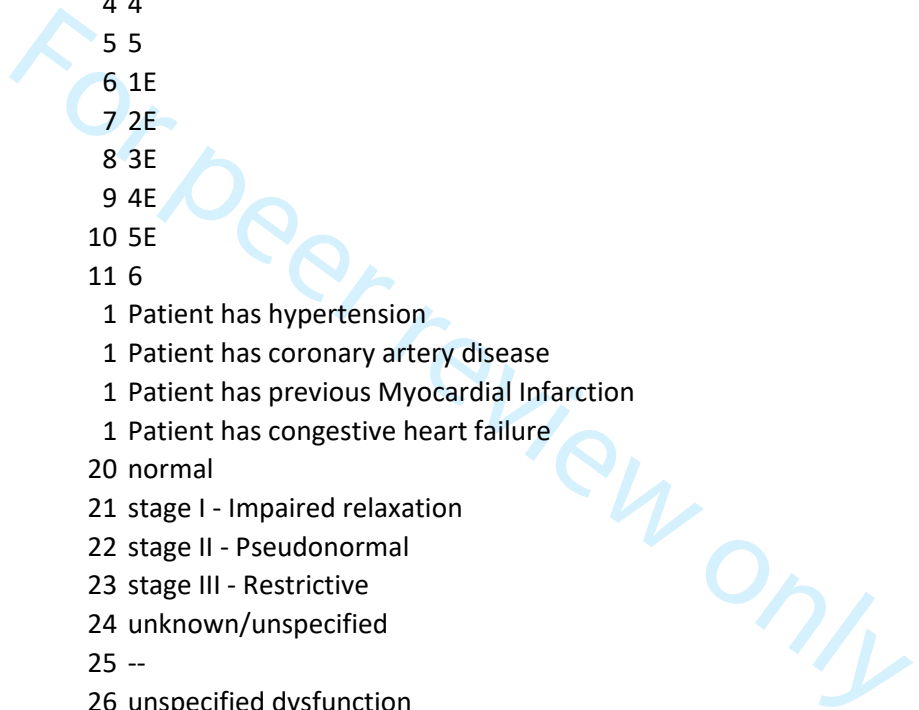

|    |                    |                                                         |
|----|--------------------|---------------------------------------------------------|
| 1  |                    |                                                         |
| 2  |                    | 38 <10%                                                 |
| 3  |                    | 39 unspecified normal                                   |
| 4  |                    | 40 unspecified mildly reduced                           |
| 5  |                    | 41 unspecified moderately reduced                       |
| 6  |                    | 42 unspecified severely reduced                         |
| 7  |                    | 43 --                                                   |
| 8  |                    |                                                         |
| 9  | VALVULAR_DISEASE   | 61 Mild                                                 |
| 10 |                    | 62 Mild-moderate                                        |
| 11 |                    | 63 Moderate                                             |
| 12 |                    | 64 Moderate-Severe                                      |
| 13 |                    | 65 Severe                                               |
| 14 |                    | 66 Unknown/unspecified                                  |
| 15 |                    | 67 --                                                   |
| 16 |                    |                                                         |
| 17 | AFIB               | 4 permanent (AF episode greater than 1 year)            |
| 18 |                    | 5 first/one detected episode (less than 7 day duration) |
| 19 |                    | 6 paroxysmal (multiple episodes <7 days)                |
| 20 |                    | 7 persistent (one or more episodes >7 days)             |
| 21 |                    | 8 unknown                                               |
| 22 |                    | 9 --                                                    |
| 23 |                    |                                                         |
| 24 |                    |                                                         |
| 25 | PPM_ICD            | 1 Patient has pacemaker                                 |
| 26 | CV_TIA_STROKE      | 1 Patient has had a stroke                              |
| 27 | PAD                | 1 Patient has peripheral artery disease                 |
| 28 | DVT                | 1 Patient has had deep vein thrombosis                  |
| 29 | PE                 | 1 Patient has had a pulmonary embolism                  |
| 30 | DM                 | 1 Patient has Diabetes                                  |
| 31 |                    |                                                         |
| 32 | Outpatient_Insulin | 103 none                                                |
| 33 |                    | 104 previous                                            |
| 34 |                    | 105 current                                             |
| 35 |                    | 106 insulin pump                                        |
| 36 |                    | 107 --                                                  |
| 37 |                    |                                                         |
| 38 | CKD                | 1 Patient has chronic kidney disease                    |
| 39 | Dialysis_History   | 90 ongoing peritoneal dialysis                          |
| 40 |                    | 95 never                                                |
| 41 |                    | 96 ongoing hemodialysis                                 |
| 42 |                    |                                                         |
| 43 |                    |                                                         |
| 44 |                    |                                                         |
| 45 |                    |                                                         |
| 46 |                    |                                                         |
| 47 |                    |                                                         |

|    |                   |            |                                                                                      |
|----|-------------------|------------|--------------------------------------------------------------------------------------|
| 1  |                   |            |                                                                                      |
| 2  |                   |            | 97 past dialysis                                                                     |
| 3  |                   |            | 98 --                                                                                |
| 4  | PHTN              |            | 1 Patient has pulmonary hypertension                                                 |
| 5  | COPD              |            | 1 Patient has chronic obstructive pulmonary disease                                  |
| 6  | ASTHMA            |            | 1 Patient has asthma                                                                 |
| 7  | OSA               |            | 1 Patient has sleep apnea                                                            |
| 8  | StopBang_Total    | continuous | Higher score is worse                                                                |
| 9  | StopBang_Observed |            | 1 Yes                                                                                |
| 10 |                   |            | 2 No                                                                                 |
| 11 |                   |            | 3 Don't know                                                                         |
| 12 | StopBang_Pressure |            | 1 Yes                                                                                |
| 13 |                   |            | 2 No                                                                                 |
| 14 |                   |            | 3 Don't know                                                                         |
| 15 | StopBang_Snore    |            | 1 Yes                                                                                |
| 16 |                   |            | 2 No                                                                                 |
| 17 |                   |            | 3 Don't know                                                                         |
| 18 | StopBang_Tired    |            | 1 Yes                                                                                |
| 19 |                   |            | 2 No                                                                                 |
| 20 |                   |            | 3 Don't know                                                                         |
| 21 | CIRRHOSIS         |            | 1 Patient has cirrhosis                                                              |
| 22 | CANCER_HX         |            | 1 patient has history of cancer                                                      |
| 23 | GERD              |            | 1 Patient has Gastroesophageal Reflux Disease                                        |
| 24 | ANEMIA            |            | 1 Patinet has history of anemia                                                      |
| 25 | COOMBS_POS        |            | 1 Patient has has a positive Coombs test                                             |
| 26 | DEMENTIA          |            | 1 Patient has history of dementia                                                    |
| 27 | SMOKING_EVER      |            | 1 Patient reports having smoked                                                      |
| 28 | ULCER             |            | 1 Patient has history of Ulcer                                                       |
| 29 | CREATININE        | continuous | Most recent serum creatinine value, manually entered during preoperative examination |
| 30 | PLATELET          | continuous | Most recent platelet count, manually entered during preoperative examination         |
| 31 | PreOp_Diastolic   | continuous | Diastolic blood pressure during preoperative examination                             |
| 32 | PreOp_Systolic    | Continuous | Systolic blood pressure during preoperative examination                              |
| 33 |                   |            |                                                                                      |
| 34 |                   |            |                                                                                      |
| 35 |                   |            |                                                                                      |
| 36 |                   |            |                                                                                      |
| 37 |                   |            |                                                                                      |
| 38 |                   |            |                                                                                      |
| 39 |                   |            |                                                                                      |
| 40 |                   |            |                                                                                      |
| 41 |                   |            |                                                                                      |
| 42 |                   |            |                                                                                      |
| 43 |                   |            |                                                                                      |
| 44 |                   |            |                                                                                      |
| 45 |                   |            |                                                                                      |
| 46 |                   |            |                                                                                      |
| 47 |                   |            |                                                                                      |

For peer review only

| 1  | <b>Field</b>     | <b>Output</b> | <b>Description</b>                                                              |
|----|------------------|---------------|---------------------------------------------------------------------------------|
| 2  | PatientID        | Identifier    |                                                                                 |
| 3  | ANESTHESIA START | Time          |                                                                                 |
| 4  | TIME             | Time          |                                                                                 |
| 5  | DESIN            | Continuous    | Inhaled desflurane concentration (volume percent)                               |
| 6  | DESOUT           | Continuous    | Exhaled desflurane concentration (volume percent)                               |
| 7  | ISOIN            | Continuous    | Inhaled isoflurane concentration (volume percent)                               |
| 8  | ISOOOUT          | Continuous    | Exhaled isoflurane concentration (volume percent)                               |
| 9  | N2OIN            | Continuous    | Inhaled nitrous oxide concentration (volume percent)                            |
| 10 | N2OOUT           | Continuous    | Exhaled nitrous oxide concentration (volume percent)                            |
| 11 | SEVOIN           | Continuous    | Inhaled sevoflurane concentration (volume percent)                              |
| 12 | SEVOOUT          | Continuous    | Exhaled sevoflurane concentration (volume percent)                              |
| 13 | TOTALMAC         | Continuous    | End-tidal anesthetic concentration (MAC [minimum alveolar concentration] units) |
| 14 | TOTALMACAGEADJ   | Continuous    | End-tidal anesthetic concentration (Age-adjusted MAC units)                     |
| 15 | BIS_INDEX        | Continuous    | Bispectral index                                                                |
| 16 | BIS_SR           | Continuous    | Suppression ratio (output from bispectral index monitor)                        |
| 17 | DIASTOLIC        | Continuous    | Diastolic blood pressure                                                        |
| 18 | SYSTOLIC         | Continuous    | Systolic blood pressure                                                         |
| 19 | BP_MEAN          | Continuous    | Mean arterial blood pressure                                                    |
| 20 | HR               | Continuous    | Heart rate                                                                      |
| 21 | PULSE            | Continuous    | Pulse                                                                           |
| 22 | TEMP             | Continuous    | Temperature                                                                     |
| 23 | TEMP_CORE        | Continuous    | Temperature                                                                     |
| 24 | SPO2             | Continuous    | Pulse Oximeter                                                                  |
| 25 | CO2              | Continuous    | End-tidal carbon dioxide                                                        |
| 26 | RR               | Continuous    | Respiratory Rate                                                                |
| 27 | PEEP             | Continuous    | Positive End-Expiratory Pressure                                                |
| 28 | PIP              | Continuous    | Positive Inspiratory Pressure                                                   |
| 29 | MV               | Continuous    | Minvute Ventilation                                                             |
| 30 | CVP              | Continuous    | Central Venous Pressure                                                         |
| 31 | URINE_OUTPUT     | Continuous    | Urine Output                                                                    |
| 32 | Est_Blood_Loss   | Continuous    | Estimated Blood Loss                                                            |
| 33 | TIDAL_VOLUME     | Continuous    | Tidal Volume                                                                    |
| 34 | GLU_ART          | Continuous    | Glucose value                                                                   |

|    |                  |                            |                                             |
|----|------------------|----------------------------|---------------------------------------------|
| 1  |                  |                            |                                             |
| 2  | GLU_VEN          | Continuous                 | Glucose value                               |
| 3  | HCT              | Continuous                 | Hematocrit                                  |
| 4  | INR              | Continuous                 | International normalized ratio              |
| 5  | Plateau pressure | Continuous                 | Plateau Pressure (airway)                   |
| 6  | PLATELET         | Continuous                 | Platelet Count                              |
| 7  | POTASSIUM        | Continuous                 | Potassium level                             |
| 8  | SECSURPPRESSED   | Continuous                 | Seconds of electroencephalogram suppression |
| 9  | DRUG_TYPE        | DRUGS                      | Types of medication                         |
| 10 |                  | DRUGS IMPORT               |                                             |
| 11 |                  | DRUGS IMPORT Allergies     |                                             |
| 12 |                  | DRUGS REMOVED FROM SERVICE |                                             |
| 13 |                  | DRUGS-ANTIBIOTICS          |                                             |
| 14 |                  | DRUGS-ANTIEMETICS          |                                             |
| 15 |                  | DRUGS-Beta blockers        |                                             |
| 16 |                  | DRUGS-CARDIACS             |                                             |
| 17 |                  | DRUGS-HYPNOTICS            |                                             |
| 18 |                  | DRUGS-LOCAL ANESTHESIA     |                                             |
| 19 |                  | DRUGS-NARCOTICS            |                                             |
| 20 |                  | DRUGS-OTHER                |                                             |
| 21 |                  | DRUGS-OTHER A-E            |                                             |
| 22 |                  | DRUGS-OTHER F-J            |                                             |
| 23 |                  | DRUGS-OTHER K-O            |                                             |
| 24 |                  | DRUGS-OTHER P-T            |                                             |
| 25 |                  | DRUGS-OTHER U-Z            |                                             |
| 26 |                  | DRUGS-OXYTOCICS            |                                             |
| 27 |                  | DRUGS-RELAXANTS            |                                             |
| 28 |                  | DRUGS-REVERSALS            |                                             |
| 29 |                  | DRUGS-TIMERS               |                                             |
| 30 |                  | FLUIDS                     |                                             |
| 31 | DRUGS            | See below                  |                                             |
| 32 | DRUG_AMT         | Continuous                 |                                             |
| 33 | DRUG_MINUTES     | Continuous                 |                                             |
| 34 |                  |                            |                                             |
| 35 |                  |                            |                                             |
| 36 |                  |                            |                                             |
| 37 |                  |                            |                                             |
| 38 |                  |                            |                                             |
| 39 |                  |                            |                                             |
| 40 |                  |                            |                                             |
| 41 |                  |                            |                                             |
| 42 |                  |                            |                                             |
| 43 |                  |                            |                                             |
| 44 |                  |                            |                                             |
| 45 |                  |                            |                                             |
| 46 |                  |                            |                                             |
| 47 |                  |                            |                                             |

| Parameter | Drug                    | Drug Type           |
|-----------|-------------------------|---------------------|
|           | 68 Morphine             | DRUGS-NARCOTICS     |
|           | 69 FentaNYL             | DRUGS-NARCOTICS     |
|           | 74 Midazolam            | DRUGS-HYPNOTICS     |
|           | 76 Propofol             | DRUGS-HYPNOTICS     |
|           | 81 Succinylcholine      | DRUGS-RELAXANTS     |
|           | 83 Pancuronium          | DRUGS-RELAXANTS     |
|           | 84 Vecuronium           | DRUGS-RELAXANTS     |
|           | 85 Rocuronium           | DRUGS-RELAXANTS     |
|           | 86 Atropine             | DRUGS-CARDIACS      |
|           | 87 Neostigmine          | DRUGS-REVERSALS     |
|           | 88 Naloxone             | DRUGS-REVERSALS     |
|           | 89 Flumazenil           | DRUGS-REVERSALS     |
|           | 100 DOPamine            | DRUGS-CARDIACS      |
|           | 101 EPHEDrine           | DRUGS-CARDIACS      |
|           | 102 Esmolol             | DRUGS-Beta blockers |
|           | 103 HydrALAZINE         | DRUGS-CARDIACS      |
|           | 105 Labetalol           | DRUGS-Beta blockers |
|           | 108 Nitroglycerin       | DRUGS-CARDIACS      |
|           | 110 Norepinephrine      | DRUGS-CARDIACS      |
|           | 112 Phenylephrine       | DRUGS-CARDIACS      |
|           | 195 Vasopressin         | DRUGS-CARDIACS      |
|           | 200 Dexamethasone       | DRUGS-OTHER         |
|           | 203 Hydrocortisone      | DRUGS-OTHER         |
|           | 207 MethylPREDNISolone  | DRUGS-OTHER         |
|           | 218 Lactated Ringers    | FLUIDS              |
|           | 220 Normal Saline       | FLUIDS              |
|           | 226 Mannitol 20%        | FLUIDS              |
|           | 232 Packed RBC          | BLOOD PRODUCTS      |
|           | 234 Platelets           | BLOOD PRODUCTS      |
|           | 235 Fresh frozen plasma | BLOOD PRODUCTS      |
|           | 236 Cryoprecipitate     | BLOOD PRODUCTS      |
|           | 237 Albumin 5%          | BLOOD PRODUCTS      |
|           | 238 Albumin 25%         | BLOOD PRODUCTS      |

|    |                               |                        |
|----|-------------------------------|------------------------|
| 1  |                               |                        |
| 2  | 573 Other fluid               | FLUIDS                 |
| 3  | 766 Cisatracurium             | DRUGS-RELAXANTS        |
| 4  | 780 Ondansetron               | DRUGS-ANTIEMETICS      |
| 5  | 968 Glycopyrrolate            | DRUGS-CARDIACS         |
| 6  | 1023 Chloroprocaine 3%        | DRUGS-LOCAL ANESTHESIA |
| 7  | 1121 Ketamine                 | DRUGS-HYPNOTICS        |
| 8  | 1198 Metoprolol               | DRUGS-Beta blockers    |
| 9  | 1204 HYDROMORPHONE            | DRUGS-NARCOTICS        |
| 10 | 1205 Meperidine hydrochloride | DRUGS-NARCOTICS        |
| 11 | 1444 1/2 Normal saline        | FLUIDS                 |
| 12 | 1446 D10-W                    | FLUIDS                 |
| 13 | 1450 D5 Ringers Lactate       | FLUIDS                 |
| 14 | 1451 D5-1/2 Normal Saline     | FLUIDS                 |
| 15 | 1452 D5-1/4 Normal Saline     | FLUIDS                 |
| 16 | 1455 D5-Normal Saline         | FLUIDS                 |
| 17 | 1456 NaHCO3 150mEq in D5W     | FLUIDS                 |
| 18 | 1457 D5-W                     | FLUIDS                 |
| 19 | 1458 D50                      | FLUIDS                 |
| 20 | 1461 Hextend                  | FLUIDS                 |
| 21 | 1670 Albuterol MDI            | DRUGS-OTHER            |
| 22 | 1671 Albuterol Neb 0.5%       | DRUGS-OTHER            |
| 23 | 1794 Diphenhydramine          | DRUGS-OTHER            |
| 24 | 1846 Glucagon                 | DRUGS-OTHER            |
| 25 | 1950 EPINEPHRINE              | DRUGS-CARDIACS         |
| 26 | 1951 Mannitol 25%             | FLUIDS                 |
| 27 | 1961 Dexmedetomidine          | DRUGS-OTHER            |
| 28 | 1968 Hyperal                  | FLUIDS                 |
| 29 | 2071 Packed RBC (ml)          | BLOOD PRODUCTS         |
| 30 | 2073 Platelets (ml)           | BLOOD PRODUCTS         |
| 31 | 2074 FFP (ml)                 | BLOOD PRODUCTS         |
| 32 | 2989 Atracurium               | DRUGS-RELAXANTS        |
| 33 | 3057 Hespan                   | FLUIDS                 |
| 34 | 3387 NaHCO3 150mEq in Water   | FLUIDS                 |
| 35 | 3460 Phenylephrine SA         | DRUGS-LOCAL ANESTHESIA |
| 36 |                               |                        |
| 37 |                               |                        |
| 38 |                               |                        |
| 39 |                               |                        |
| 40 |                               |                        |
| 41 |                               |                        |
| 42 |                               |                        |
| 43 |                               |                        |
| 44 |                               |                        |
| 45 |                               |                        |
| 46 |                               |                        |
| 47 |                               |                        |



|    |                                           |                        |
|----|-------------------------------------------|------------------------|
| 1  |                                           |                        |
| 2  | 3489 FentaNYL SA                          | DRUGS-LOCAL ANESTHESIA |
| 3  | 9097 D5-1/2 Normal Saline 20K             | FLUIDS                 |
| 4  | 10291 OxyCODONE/Acetaminophen 5/325 (     | DRUGS-NARCOTICS        |
| 5  | 10297 OxyCODONE CR (for OxyCONTIN)        | DRUGS-NARCOTICS        |
| 6  | 10298 EPINEPHrine inh 2.25%               | DRUGS-CARDIACS         |
| 7  | 10585 Albuterol Neb 2.5mg                 | DRUGS-OTHER            |
| 8  | 10647 Racepinephrine Neb 2.25%            | DRUGS-OTHER P-T        |
| 9  | 10648 D5-Normal Saline 20 KCL             | FLUIDS                 |
| 10 | 10652 Ketorolac Tromethamine (for Toradol | DRUGS-OTHER K-O        |
| 11 | 10665 OxyCODONE IR                        | DRUGS-NARCOTICS        |
| 12 | 10667 Morphine Sulfate 1mg/ml PCA         | DRUGS-NARCOTICS        |
| 13 | 10672 HYDROmorphone 0.5mg/ml PCA          | DRUGS-NARCOTICS        |
| 14 | 10689 Propofol (ml)                       | DRUGS-HYPNOTICS        |
| 15 | 10821 1/2 Normal Saline 20 KCL            | FLUIDS                 |
| 16 | 10910 Voluven                             | FLUIDS                 |
| 17 | 11292 Normal Saline 20 KCL                | FLUIDS                 |
| 18 | 11951 Racepinephrine Neb 2.25% (ml)       | DRUGS-OTHER P-T        |
| 19 | 14162 Ropivacaine 0.2% w/HYDROmorphon     | DRUGS-LOCAL ANESTHESIA |
| 20 | 14163 Ropivacaine 0.2% w/HYDROmorphon     | DRUGS-LOCAL ANESTHESIA |
| 21 | 14166 Ropivacaine 0.125% w/HYDROmorph     | DRUGS-LOCAL ANESTHESIA |
| 22 | 14325 Recomb Factor VII (ml)              | BLOOD PRODUCTS         |
| 23 | 14796 Albuterol Neb                       | DRUGS-OTHER            |
| 24 |                                           |                        |
| 25 |                                           |                        |
| 26 |                                           |                        |
| 27 |                                           |                        |
| 28 |                                           |                        |
| 29 |                                           |                        |
| 30 |                                           |                        |
| 31 |                                           |                        |
| 32 |                                           |                        |
| 33 |                                           |                        |
| 34 |                                           |                        |
| 35 |                                           |                        |
| 36 |                                           |                        |
| 37 |                                           |                        |
| 38 |                                           |                        |
| 39 |                                           |                        |
| 40 |                                           |                        |
| 41 |                                           |                        |
| 42 |                                           |                        |
| 43 |                                           |                        |
| 44 |                                           |                        |
| 45 |                                           |                        |
| 46 |                                           |                        |
| 47 |                                           |                        |

|    |             |                                                     |
|----|-------------|-----------------------------------------------------|
| 1  |             |                                                     |
| 2  | SurveyHea   | 0 Reported No Heart Attack on Survey                |
| 3  |             | 1 Reported Heart Attack on Survey                   |
| 4  |             | 3 Prefer not to answer                              |
| 5  | SurveyCard  | 0 Reported No Cardiac Arrest on Survey              |
| 6  |             | 1 Reported Cardiac Arrest on Survey                 |
| 7  |             | 3 Prefer not to answer                              |
| 8  | SurveyHea   | 0 Reported No Heart Failure on Survey               |
| 9  |             | 1 Reported Heart Failure on Survey                  |
| 10 |             | 3 Prefer not to answer                              |
| 11 | SurveyStro  | 0 Reported No Stroke on Survey                      |
| 12 |             | 1 Reported Stroke on Survey                         |
| 13 |             | 3 Prefer not to answer                              |
| 14 | SurveyBloo  | 0 Reported No Leg Blood Clot on Survey              |
| 15 |             | 1 Reported Leg Blood Clot on Survey                 |
| 16 |             | 3 Prefer not to answer                              |
| 17 | SurveyBloo  | 0 Reported No Lung Blood Clot on Survey             |
| 18 |             | 1 Reported Lung Blood Clot on Survey                |
| 19 |             | 3 Prefer not to answer                              |
| 20 | SurveyWou   | 0 Reported No Wound Infection on Survey             |
| 21 |             | 1 Reported Wound Infection on Survey                |
| 22 |             | 3 Prefer not to answer                              |
| 23 | SurveyResp  | 0 Reported No Respiratory Failure on Survey         |
| 24 |             | 1 Reported Respiratory Failure on Survey            |
| 25 |             | 3 Prefer not to answer                              |
| 26 | SurveyPnei  | 0 Reported No Pneumonia on Survey                   |
| 27 |             | 1 Reported Pneumonia on Survey                      |
| 28 |             | 3 Prefer not to answer                              |
| 29 | SurveyNerv  | 0 Reported No Nerve Injury on Survey                |
| 30 |             | 1 Reported Nerve Injury on Survey                   |
| 31 |             | 3 Prefer not to answer                              |
| 32 | SurveyGIBl  | 0 Reported No GI Bleed on Survey                    |
| 33 |             | 1 Reported GI Bleed on Survey                       |
| 34 |             | 3 Prefer not to answer                              |
| 35 | SurveyUlce  | 0 Reported No Ulcer on Survey                       |
| 36 |             | 1 Reported Ulcer on Survey                          |
| 37 |             | 3 Prefer not to answer                              |
| 38 | SurveyDelir | 0 Reported No Delerium on Survey                    |
| 39 |             | 1 Reported Delerium on Survey                       |
| 40 |             | 3 Prefer not to answer                              |
| 41 | 30d_Surve   | 0 Reported No Readdmission within 30 days on Survey |
| 42 |             | 1 Reported Readdmission within 30 days on Survey    |
| 43 |             | 3 Prefer not to answer                              |
| 44 | 1y_Surve    | 0 Reported No Readdmission within 1 year on Survey  |
| 45 |             | 1 Reported Readdmission within 1 year on Survey     |
| 46 |             | 3 Prefer not to answer                              |
| 47 |             |                                                     |
| 48 |             |                                                     |
| 49 |             |                                                     |
| 50 |             |                                                     |
| 51 |             |                                                     |
| 52 |             |                                                     |
| 53 |             |                                                     |
| 54 |             |                                                     |
| 55 |             |                                                     |
| 56 |             |                                                     |
| 57 |             |                                                     |
| 58 |             |                                                     |
| 59 |             |                                                     |
| 60 |             |                                                     |

| 1  | <b>Info_Type</b>           | <b>SubField</b>            | <b>Output</b>                                 | <b>Description</b>                                        |                                                       |
|----|----------------------------|----------------------------|-----------------------------------------------|-----------------------------------------------------------|-------------------------------------------------------|
| 2  | ADT                        | AdmitDtm                   | [DateTime]                                    | Hospital Admit DateTime                                   |                                                       |
| 3  |                            | DischargeDtm               | [DateTime]                                    | Hospital Discharge DateTime                               |                                                       |
| 4  |                            | ICU_Unit                   | 10400 ICU                                     | ICU Name - Neurosurgery ICU                               |                                                       |
| 5  |                            |                            | 4400 ICU                                      | ICU Name - Surgical/Burn/Trauma ICU                       |                                                       |
| 6  |                            |                            | 5600 ICU                                      | ICU Name - Cardiothoracic ICU                             |                                                       |
| 7  |                            |                            | 8200 ICU                                      | ICU Name - Cardiac ICU                                    |                                                       |
| 8  |                            |                            | 83 CTICU                                      | ICU Name - Cardiothoracic ICU                             |                                                       |
| 9  |                            |                            | ICU_InDtm                                     | [DateTime]                                                | ICU Admit DateTime                                    |
| 10 |                            | ICU_OutDtm                 | [DateTime]                                    | ICU Discharge DateTime                                    |                                                       |
| 11 |                            | Diagnoses                  | Value                                         | [Text]                                                    | Diagnoses related to delirium/encephalopathy          |
| 12 |                            |                            | DischargeDX                                   | [Text]                                                    | Discharge Diagnosis                                   |
| 13 |                            | Readmissions               | Re_Adm_IDCode                                 | [Continuous]                                              | Medical record number for readmission                 |
| 14 |                            |                            | Re_adm_VisitIDCode                            | [Continuous]                                              | Patient account number (registration) for readmission |
| 15 | Re_Adm_Location            |                            | [Text]                                        | Bed assignment for readmission                            |                                                       |
| 16 | Re_Adm_AdmitDtm            |                            | [DateTime]                                    | DateTime of Readmission                                   |                                                       |
| 17 | Re_Adm_AdmitDx             |                            | [Text]                                        | Diagnosis for readmission                                 |                                                       |
| 18 | DurationBetweenVisits_Days |                            | [Continuous]                                  | Duration (days) between initial discharge and readmission |                                                       |
| 19 | Labs                       | SignificantDtm             | [DateTime]                                    | DateTime of Lab Test                                      |                                                       |
| 20 |                            | Label                      | A-a Gradient                                  | Alveolar-Arterial Oxygen Gradient (mmHg)                  |                                                       |
| 21 |                            |                            | Albumin Level                                 | Plasma albumin level (g/dL)                               |                                                       |
| 22 |                            | Alkaline Phosphatase Total | Plasma alkaline phosphatase level (units/L)   |                                                           |                                                       |
| 23 |                            | ALT                        | Plasma alanine transaminase level (units/L)   |                                                           |                                                       |
| 24 |                            | Anion Gap                  | Plasma anion gap (mmol/L)                     |                                                           |                                                       |
| 25 |                            | AST                        | Plasma aspartate transaminase level (units/L) |                                                           |                                                       |
| 26 |                            |                            |                                               |                                                           |                                                       |
| 27 |                            |                            |                                               |                                                           |                                                       |

|    |                                 |                                               |
|----|---------------------------------|-----------------------------------------------|
| 1  |                                 | Concentration of basophils in blood           |
| 2  |                                 | (K/mm <sup>3</sup> )                          |
| 3  | Basophil Absolute Automated     | Percent of basophils in blood (%)             |
| 4  | Basophil Percent Automated      | Plasma direct bilirubin level (mg/dL)         |
| 5  | Bilirubin Direct                | Plasma total bilirubin level (mg/dL)          |
| 6  | Bilirubin Total                 | Plasma calcium level (mg/dL)                  |
| 7  | Calcium Total                   | Plasma chloride level (mmol/L)                |
| 8  | Chloride Level                  | Plasma bicarbonate level, measured            |
| 9  |                                 | (mmol/L)                                      |
| 10 | CO2 Total                       | Plasma bicarbonate level, calculated from     |
| 11 |                                 | arterial blood gas (mmol/L)                   |
| 12 | CO2, Total Calculated, Arterial | Plasma creatinine level (mg/dL)               |
| 13 | Creatinine Level                | Concentration of eosinophils in blood         |
| 14 |                                 | (K/mm <sup>3</sup> )                          |
| 15 | Eosinophil Absolute Automated   | Percent of eosinophils in blood (%)           |
| 16 | Eosinophil Percent Automated    | Plasma glucose level, fasting (mg/dL)         |
| 17 | Glucose Level Fasting           | Plasma glucose level (mg/dL)                  |
| 18 | Glucose Level Random            | Urine glucose, qualitative (negative, 1+, 2+, |
| 19 |                                 | 3+)                                           |
| 20 | Glucose Ur Qual                 | Plasma glucose level, point of care (mg/dL)   |
| 21 |                                 | Hematocrit (%)                                |
| 22 | Glucose WB f POC                | Hemoglobin A1c (%)                            |
| 23 | HCT                             | Hemoglobin level (g/dL)                       |
| 24 | Hemoglobin A1c                  |                                               |
| 25 | HGB                             | International normalized ratio (no units)     |
| 26 |                                 | Concentration of lymphocytes in blood         |
| 27 | INR ePOC                        | (K/mm <sup>3</sup> )                          |
| 28 |                                 | Percent of lymphocytes in blood (%)           |
| 29 | Lymphocyte Absolute Automated   | Mean corpuscular hemoglobin (pg)              |
| 30 | Lymphocyte Percent Automated    | Mean corpuscular hemoglobin                   |
| 31 | MCH                             | concentration (g/dL)                          |
| 32 |                                 | Mean corpuscular volume (fL)                  |
| 33 | MCHC                            |                                               |
| 34 | MCV                             |                                               |

|    |                                   |                                                                             |
|----|-----------------------------------|-----------------------------------------------------------------------------|
|    |                                   | Concentration of monocytes in blood<br>(K/mm <sup>3</sup> )                 |
| 1  | Monocyte Absolute Automated       |                                                                             |
| 2  | Monocyte Percent Automated        | Percent of monocytes in blood (%)                                           |
| 3  | MPV                               | Mean platelet volume (fL)                                                   |
| 4  |                                   | Concentration of neutrophils in blood<br>(K/mm <sup>3</sup> )               |
| 5  | Neutrophil Absolute Automated     |                                                                             |
| 6  | Neutrophil Percent Automated      | Percent of neutrophils in blood (%)                                         |
| 7  |                                   | Concentration of nucleated red blood cells<br>in blood (K/mm <sup>3</sup> ) |
| 8  | NRBC Abs Auto                     |                                                                             |
| 9  | NRBC Pct Auto                     | Percent of nucleated red blood cells in<br>blood (%)                        |
| 10 |                                   | Arterial Partial Pressure of Carbon Dioxide<br>(mmHg)                       |
| 11 | pCO2 Art gPOC                     |                                                                             |
| 12 |                                   | Venous Partial Pressure of Carbon Dioxide<br>(mmHg)                         |
| 13 | pCO2 Ven gPOC                     |                                                                             |
| 14 |                                   | Arterial Partial Pressure of Carbon Dioxide<br>(mmHg)                       |
| 15 | pCO2, Arterial                    |                                                                             |
| 16 | Percent Inspired Oxygen, Arterial | Percent Inspired Oxygen (%)                                                 |
| 17 | pH Art gPOC                       | Arterial pH (no units)                                                      |
| 18 | pH Arterial                       | Arterial pH (no units)                                                      |
| 19 |                                   | Concentration of platelets in blood (K/mm <sup>3</sup> )                    |
| 20 | platelet cPOC                     |                                                                             |
| 21 |                                   | Concentration of platelets in blood (K/mm <sup>3</sup> )                    |
| 22 | Plt                               |                                                                             |
| 23 |                                   | Arterial Partial Pressure of Oxygen (mmHg)                                  |
| 24 | pO2 Art gPOC                      |                                                                             |
| 25 |                                   | Venous Partial Pressure of Oxygen (mmHg)                                    |
| 26 | pO2 Ven gPOC                      |                                                                             |
| 27 |                                   | Arterial Partial Pressure of Oxygen (mmHg)                                  |
| 28 | pO2, Arterial                     |                                                                             |
| 29 | Potassium Level Plasma            | Plasma potassium level (mmol/L)                                             |
| 30 | Protein Level Plasma              | Plasma protein level (g/dL)                                                 |
| 31 | PT (Seconds)                      | Prothrombin time (sec)                                                      |
| 32 | PT ePOC                           | Prothrombin time (sec)                                                      |

1  
2  
3  
4  
5  
6  
7  
8  
9  
10  
11  
12  
13  
14  
15  
16  
17  
18  
19  
20  
21  
22  
23  
24  
25  
26  
27  
28  
29  
30  
31  
32  
33  
34  
35  
36  
37  
38  
39  
40  
41  
42  
43  
44  
45  
46  
47

For peer review only

|                                          |                                                                  |
|------------------------------------------|------------------------------------------------------------------|
| PTT Activated                            | Partial thromboplastin time, activated (sec)                     |
| PTT Activated.                           | Partial thromboplastin time, activated (sec)                     |
| RBC                                      | Concentration of red blood cells in blood (M/mm <sup>3</sup> )   |
| RDW CV                                   | Red cell distribution width (%)                                  |
| RDW SD                                   | Red cell distribution width (fL)                                 |
| Sodium gPOC                              | Plasma sodium level (mmol/L)                                     |
| Sodium iPOC                              | Plasma sodium level (mmol/L)                                     |
| Sodium Level                             | Plasma sodium level (mmol/L)                                     |
| Urea Nitrogen                            | Plasma urea nitrogen (BUN) level (mg/dL)                         |
| Volume Inspired Oxygen Arterial          | --                                                               |
| WBC                                      | Concentration of white blood cells in blood (K/mm <sup>3</sup> ) |
| [Continuous]                             | Value of lab test                                                |
| [DateTime]                               | DateTime medication order is placed in electronic medical record |
| ALPRAZolam Tablet                        |                                                                  |
| Ampicillin/Sulbactam - CRITICAL SHORTAGE |                                                                  |
| CeFAZolin IVPB                           |                                                                  |
| Cefepime IVPB - CRITICAL SHORTAGE        |                                                                  |
| CefOXitin IVPB                           |                                                                  |
| CefTRIAxone IVPB                         |                                                                  |
| Clotrimazole Troche                      |                                                                  |
| Darunavir                                |                                                                  |
| Dexmedetomidine Infusion                 |                                                                  |
| DiazePAM Injection                       |                                                                  |
| DiphenhydrAMINE Oral                     |                                                                  |
| Eszopiclone                              |                                                                  |
| FentaNYL Bolus from CADD                 |                                                                  |
| FentaNYL Infusion                        |                                                                  |

Medications

Value

SignificantDtm  
Label

1  
2 FentaNYL Injection  
3 Fluconazole Tablet  
4 Haloperidol (immediate-acting) Lactate  
5 Injection  
6 HYDROmorphone Bolus from CADD  
7 HYDROmorphone Injection  
8 HYDROmorphone PCA  
9 Insulin Glargine for LANTUS  
10 Insulin Lispro for HumaLOG  
11  
12  
13  
14 Insulin Lispro-Sliding Scale for HumaLOG  
15 Insulin NPH for HumuLIN-N  
16 Insulin Regular for HumuLIN-R  
17 Insulin Regular Infusion  
18 LORazepam Injection  
19 LORazepam Tablet  
20 Maraviroc  
21 Metoclopramide Injection  
22 Micafungin IVPB  
23 Midazolam Infusion  
24 Midazolam Injection  
25 Morphine Injection  
26 Nystatin Liquid  
27 Ondansetron Injection  
28 Oxacillin IVPB  
29 OxyCODONE Liquid  
30  
31  
32  
33  
34 OxyCODONE Tablet Immediate-Release  
35  
36  
37 OxyCODONE/Acetaminophen 5/325 mg  
38 Piperacillin/Tazobactam  
39 QUETiapine Tablet  
40 Raltegravir  
41 Ramelteon  
42  
43  
44  
45  
46  
47

|    |                        |                                     |                             |                                                         |
|----|------------------------|-------------------------------------|-----------------------------|---------------------------------------------------------|
| 1  |                        |                                     | Ritonavir Tablet            |                                                         |
| 2  |                        |                                     | Trimethobenzamide Injection |                                                         |
| 3  |                        |                                     |                             | Medication dose (low end of range, if applicable)       |
| 4  |                        |                                     |                             | Medication dose (high end of range)                     |
| 5  |                        | DosageLow                           | [Continuous]                | Unit of measure for dosage                              |
| 6  |                        | DosageHigh                          | [Continuous]                | Frequency of medication order                           |
| 7  |                        | UOM                                 | [Categorical]               | Number of days during which medication order was active |
| 8  |                        | FrequencyCode                       | [Categorical]               |                                                         |
| 9  |                        |                                     |                             |                                                         |
| 10 |                        | Duration_Days                       | [Continuous]                |                                                         |
| 11 |                        |                                     |                             |                                                         |
| 12 |                        |                                     |                             |                                                         |
| 13 |                        |                                     |                             |                                                         |
| 14 | Clinical Documentation |                                     |                             |                                                         |
| 15 | - 01. Vital Signs      | SignificantDtm                      | [DateTime]                  | DateTime of vital sign record                           |
| 16 |                        | Intensity                           | [Continuous]                | Numeric rating scale (0-10) pain score                  |
| 17 |                        | Behaviors                           | Calm                        |                                                         |
| 18 |                        |                                     | Agitated                    |                                                         |
| 19 |                        |                                     | 0-10 Scale                  |                                                         |
| 20 |                        | Tool Used                           | Faces                       |                                                         |
| 21 |                        |                                     | Non Communicative           |                                                         |
| 22 |                        |                                     | [Continuous]                | Patient's target pain score                             |
| 23 |                        | Patient Goal                        | [Continuous]                | Location of pain                                        |
| 24 |                        | Location                            | [Categorical]               | Nurse response to current pain score                    |
| 25 |                        | Pain Management                     | [Categorical]               |                                                         |
| 26 |                        |                                     |                             |                                                         |
| 27 |                        |                                     |                             |                                                         |
| 28 |                        | Effectiveness of Pain Interventions | Obtaining relief            |                                                         |
| 29 |                        |                                     | Partial relief              |                                                         |
| 30 |                        |                                     | No relief                   |                                                         |
| 31 |                        |                                     |                             |                                                         |
| 32 |                        |                                     |                             |                                                         |
| 33 | Clinical Documentation |                                     |                             |                                                         |
| 34 | - 03. Assessment/IPOC  | SignificantDtm                      | [DateTime]                  | DateTime of CAM-ICU Assessment                          |
| 35 |                        | CAM-ICU Overall Score               | [Negative/Positive]         | CAM-ICU Result (delirium assessment)                    |
| 36 |                        | Feature 1: Acute Onset or           |                             |                                                         |
| 37 |                        | Fluctuating Course                  | [Negative/Positive]         | Feature 1 of CAM-ICU                                    |
| 38 |                        | Feature 2: Inattention              | [Negative/Positive]         | Feature 2 of CAM-ICU                                    |
| 39 |                        | Feature 3: Altered Level of         |                             |                                                         |
| 40 |                        | Consciousness                       | [Negative/Positive]         | Feature 3 of CAM-ICU                                    |
| 41 |                        |                                     |                             |                                                         |
| 42 |                        |                                     |                             |                                                         |
| 43 |                        |                                     |                             |                                                         |
| 44 |                        |                                     |                             |                                                         |
| 45 |                        |                                     |                             |                                                         |
| 46 |                        |                                     |                             |                                                         |
| 47 |                        |                                     |                             |                                                         |



|    |                        |                                        |                     |                                               |
|----|------------------------|----------------------------------------|---------------------|-----------------------------------------------|
| 1  |                        |                                        |                     |                                               |
| 2  |                        | Feature 4: Disorganized Thinking       | [Negative/Positive] | Feature 4 of CAM-ICU                          |
| 3  |                        |                                        |                     | Indicates whether CAM-ICU is                  |
| 4  |                        |                                        |                     | contraindicated (e.g., because patient is too |
| 5  |                        | RASS: If -4 or -5, STOP Reassess later | [Categorical]       | sedated)                                      |
| 6  |                        |                                        |                     |                                               |
| 7  |                        |                                        |                     |                                               |
| 8  | Clinical Documentation |                                        |                     |                                               |
| 9  | - Fall Event Note      | SignificantDtm                         | [DateTime]          |                                               |
| 10 |                        | Fall Date/Time                         | [DateTime]          | DateTime of Fall                              |
| 11 |                        |                                        |                     | Indicates whether fall resulted in patient    |
| 12 |                        | Injury                                 | [Yes/No]            | injury                                        |
| 13 |                        | Injury Details                         | [Text]              | Description of injury                         |
| 14 |                        |                                        |                     |                                               |
| 15 |                        |                                        |                     |                                               |
| 16 | Clinical Documentation |                                        |                     |                                               |
| 17 | - Neuro Flowsheet      | SignificantDtm                         | [DateTime]          | DateTime of RASS Assessment                   |
| 18 |                        | Behaviors                              | Calm                |                                               |
| 19 |                        |                                        | Agitated            |                                               |
| 20 |                        |                                        | Restless            |                                               |
| 21 |                        |                                        |                     |                                               |
| 22 |                        |                                        |                     | Richmond Agitation Sedation Scale score (-4   |
| 23 |                        | RASS Score Numeric                     | [Continuous]        | to 4)                                         |
| 24 |                        |                                        |                     |                                               |
| 25 |                        | RASS Sedation Scale                    | [Categorical]       | Verbal description of RASS numeric score      |
| 26 |                        |                                        |                     |                                               |
| 27 |                        |                                        |                     |                                               |
| 28 | Clinical Documentation |                                        |                     |                                               |
| 29 | - Intubation Procedure |                                        |                     |                                               |
| 30 | Note                   | SignificantDtm                         | [DateTime]          | DateTime of Intubation Note                   |
| 31 |                        | Intubation Type                        | [Emergent/Elective] |                                               |
| 32 |                        | Paralytics Given                       | [Yes/No]            |                                               |
| 33 |                        | Procedure Date/Time                    | [DateTime]          | DateTime of Intubation                        |
| 34 |                        | Sedation Given                         | [Yes/No]            |                                               |
| 35 |                        |                                        |                     |                                               |
| 36 |                        |                                        |                     |                                               |
| 37 |                        |                                        |                     |                                               |
| 38 | Clinical Documentation |                                        |                     |                                               |
| 39 | - Patient Profile      | SignificantDtm                         | [DateTime]          | DateTime of assessment                        |
| 40 |                        | Does patient currently have a          |                     |                                               |
| 41 |                        | tracheostomy tube?                     | [Yes/No]            |                                               |
| 42 |                        |                                        |                     |                                               |
| 43 |                        |                                        |                     |                                               |
| 44 |                        |                                        |                     |                                               |
| 45 |                        |                                        |                     |                                               |
| 46 |                        |                                        |                     |                                               |
| 47 |                        |                                        |                     |                                               |

1  
2  
3  
4  
5  
6  
7  
8  
9  
10  
11  
12  
13  
14  
15  
16  
17  
18  
19  
20  
21  
22  
23  
24  
25  
26  
27  
28  
29  
30  
31  
32  
33  
34  
35  
36  
37  
38  
39  
40  
41  
42  
43  
44  
45  
46  
47

Does patient have a history of laryngectomy? [Yes/No]

Clinical Documentation

|                            |                  |                                                 |                                                        |
|----------------------------|------------------|-------------------------------------------------|--------------------------------------------------------|
| - Ventilator Flowsheet     | SignificantDtm   | [DateTime]                                      | DateTime of ventilator event                           |
|                            | Modes/Bagged     | A/C - VC                                        | Assist control - volume control (AC-VC)                |
|                            |                  | A/C - VC+                                       | Assist control - volume control + (AC-VC+)             |
|                            |                  | A/C - PC                                        | Assist control - pressure control (AC-PC)              |
|                            |                  | BiPAP                                           | Bilevel positive airway pressure (BiPAP)               |
|                            |                  | Continuous Positive Airway Pressure             | Continuous positive airway pressure (CPAP)             |
|                            |                  | SIMV - VC                                       | Synchronized intermittent mandatory ventilation (SIMV) |
|                            |                  | SIMV-PC                                         | Synchronized intermittent mandatory ventilation (SIMV) |
|                            |                  | SIMV-VC                                         | Synchronized intermittent mandatory ventilation (SIMV) |
|                            |                  | SPONT-VC                                        | Pressure support (PSV)                                 |
|                            |                  | Synchronized intermittent mandatory ventilation | Synchronized intermittent mandatory ventilation (SIMV) |
| Ventilator Pulmonary Event | Extubation       |                                                 |                                                        |
|                            | Re-intubation    |                                                 |                                                        |
|                            | Ventilator start |                                                 | Start of mechanical ventilation                        |
|                            | Ventilator stop  |                                                 | End of mechanical ventilation                          |
|                            | Weaning end      |                                                 |                                                        |
|                            | Weaning start    |                                                 |                                                        |
