# Supplementary material for: Using machine learning techniques to develop forecasting algorithms for postoperative complications: protocol for a retrospective study
Source: PubMed Central journal article supplement — BMJ Open. 2018 Apr 10;8(4):e020124. doi: 10.1136/bmjopen-2017-020124 (PMC5898287; doi:10.1136/bmjopen-2017-020124), 2018-04-10
Supplement: bmjopen-2017-020124supp001.pdf [file bmjopen-2017-020124supp001.pdf]

| <b>Field</b>        | <b>Output</b>      | <b>Description</b>                                                                                                                                                                                                                                            |
|---------------------|--------------------|---------------------------------------------------------------------------------------------------------------------------------------------------------------------------------------------------------------------------------------------------------------|
| PatientID           |                    | Identifier                                                                                                                                                                                                                                                    |
| Surg_Type           |                    | Text field                                                                                                                                                                                                                                                    |
| Anesthesia_Type     |                    | 1 General<br>2 Block<br>3 MAC<br>4 Spinal<br>5 Epidural<br>6 CSE<br>8 Cancelled Procedure<br>9 Cancelled Procedure after selected anesthesia type(s)<br>10 converted to General                                                                               |
| SEX                 |                    | 1 Male<br>2 Female                                                                                                                                                                                                                                            |
| RACE                |                    | 3 Unknown<br>5 Unknown<br>6 Hispanic<br>7 Black American<br>8 Other<br>9 White<br>10 American Indian<br>11 Asian<br>12 American Indian or Alaska Native<br>13 Black or African American<br>14 Native Hawaiian or other Pacific Islander<br>15 Some other Race |
| HEIGHT              | Continuous         | CM                                                                                                                                                                                                                                                            |
| WEIGHT              | Continuous         | KG                                                                                                                                                                                                                                                            |
| Ideal_Body_Weight   | Continuous         | Ideal weight at designated height, sex, etc.                                                                                                                                                                                                                  |
| BMI                 | Continuous         | Body Mass Index                                                                                                                                                                                                                                               |
| CCI                 | Integer score 0-41 | Charlson Comorbidity Index                                                                                                                                                                                                                                    |
| FUNCTIONAL_CAPACITY |                    | 5 -<br>6 >10 METs<br>7 6-10 METS                                                                                                                                                                                                                              |

|                        |                                              |
|------------------------|----------------------------------------------|
|                        | 8 4-6 METS                                   |
|                        | 9 <4 METS                                    |
|                        | 10 Ambulates with assistance only            |
|                        | 11 Cannot assess                             |
| ASA                    | 1 1                                          |
|                        | 2 2                                          |
|                        | 3 3                                          |
|                        | 4 4                                          |
|                        | 5 5                                          |
|                        | 6 1E                                         |
|                        | 7 2E                                         |
|                        | 8 3E                                         |
|                        | 9 4E                                         |
|                        | 10 5E                                        |
|                        | 11 6                                         |
| HTN                    | 1 Patient has hypertension                   |
| CAD                    | 1 Patient has coronary artery disease        |
| CAD_PRIORMI            | 1 Patient has previous Myocardial Infarction |
| CHF                    | 1 Patient has congestive heart failure       |
| CHF_Diastolic_Function | 20 normal                                    |
|                        | 21 stage I - Impaired relaxation             |
|                        | 22 stage II - Pseudonormal                   |
|                        | 23 stage III - Restrictive                   |
|                        | 24 unknown/unspecified                       |
|                        | 25 --                                        |
|                        | 26 unspecified dysfunction                   |
| LVEF                   | 30 unknown                                   |
|                        | 31 >70%                                      |
|                        | 32 60-70%                                    |
|                        | 33 50-60%                                    |
|                        | 34 40-50%                                    |
|                        | 35 30-40%                                    |
|                        | 36 20-30%                                    |
|                        | 37 10-20%                                    |

|                    |                                                         |
|--------------------|---------------------------------------------------------|
|                    | 38 <10%                                                 |
|                    | 39 unspecified normal                                   |
|                    | 40 unspecified mildly reduced                           |
|                    | 41 unspecified moderately reduced                       |
|                    | 42 unspecified severely reduced                         |
|                    | 43 --                                                   |
| VALVULAR_DISEASE   | 61 Mild                                                 |
|                    | 62 Mild-moderate                                        |
|                    | 63 Moderate                                             |
|                    | 64 Moderate-Severe                                      |
|                    | 65 Severe                                               |
|                    | 66 Unknown/unspecified                                  |
|                    | 67 --                                                   |
| AFIB               | 4 permanent (AF episode greater than 1 year)            |
|                    | 5 first/one detected episode (less than 7 day duration) |
|                    | 6 paroxysmal (multiple episodes <7 days)                |
|                    | 7 persistent (one or more episodes >7 days)             |
|                    | 8 unknown                                               |
|                    | 9 --                                                    |
| PPM_ICD            | 1 Patient has pacemaker                                 |
| CV_TIA_STROKE      | 1 Patient has had a stroke                              |
| PAD                | 1 Patient has peripheral artery disease                 |
| DVT                | 1 Patient has had deep vein thrombosis                  |
| PE                 | 1 Patient has had a pulmonary embolism                  |
| DM                 | 1 Patient has Diabetes                                  |
| Outpatient_Insulin | 103 none                                                |
|                    | 104 previous                                            |
|                    | 105 current                                             |
|                    | 106 insulin pump                                        |
|                    | 107 --                                                  |
| CKD                | 1 Patient has chronic kidney disease                    |
| Dialysis_History   | 90 ongoing peritoneal dialysis                          |
|                    | 95 never                                                |
|                    | 96 ongoing hemodialysis                                 |

|                   |            |                                                                                      |
|-------------------|------------|--------------------------------------------------------------------------------------|
|                   |            | 97 past dialysis                                                                     |
|                   |            | 98 --                                                                                |
| PHTN              |            | 1 Patient has pulmonary hypertension                                                 |
| COPD              |            | 1 Patient has chronic obstructive pulmonary disease                                  |
| ASTHMA            |            | 1 Patient has asthma                                                                 |
| OSA               |            | 1 Patient has sleep apnea                                                            |
| StopBang_Total    | continuous | Higher score is worse                                                                |
| StopBang_Observed |            | 1 Yes                                                                                |
|                   |            | 2 No                                                                                 |
|                   |            | 3 Don't know                                                                         |
| StopBang_Pressure |            | 1 Yes                                                                                |
|                   |            | 2 No                                                                                 |
|                   |            | 3 Don't know                                                                         |
| StopBang_Snore    |            | 1 Yes                                                                                |
|                   |            | 2 No                                                                                 |
|                   |            | 3 Don't know                                                                         |
| StopBang_Tired    |            | 1 Yes                                                                                |
|                   |            | 2 No                                                                                 |
|                   |            | 3 Don't know                                                                         |
| CIRRHOSIS         |            | 1 Patient has cirrhosis                                                              |
| CANCER_HX         |            | 1 patient has history of cancer                                                      |
| GERD              |            | 1 Patient has Gastroesophageal Reflux Disease                                        |
| ANEMIA            |            | 1 Patient has history of anemia                                                      |
| COOMBS_POS        |            | 1 Patient has has a positive Coombs test                                             |
| DEMENTIA          |            | 1 Patient has history of dementia                                                    |
| SMOKING_EVER      |            | 1 Patient reports having smoked                                                      |
| ULCER             |            | 1 Patient has history of Ulcer                                                       |
| CREATININE        | continuous | Most recent serum creatinine value, manually entered during preoperative examination |
| PLATELET          | continuous | Most recent platelet count, manually entered during preoperative examination         |
| PreOp_Diastolic   | continuous | Diastolic blood pressure during preoperative examination                             |
| PreOp_Systolic    | Continuous | Systolic blood pressure during preoperative examination                              |
