# Supplementary material for: Using machine learning techniques to develop forecasting algorithms for postoperative complications: protocol for a retrospective study
Source: PubMed Central journal article supplement — BMJ Open. 2018 Apr 10;8(4):e020124. doi: 10.1136/bmjopen-2017-020124 (PMC5898287; doi:10.1136/bmjopen-2017-020124), 2018-04-10
Supplement: bmjopen-2017-020124supp002.pdf [file bmjopen-2017-020124supp002.pdf]

| <b>Field</b>          | <b>Output</b> | <b>Description</b>                                                              |
|-----------------------|---------------|---------------------------------------------------------------------------------|
| PatientID             | Identifier    |                                                                                 |
| ANESTHESIA START TIME | Time          |                                                                                 |
| DESIN                 | Continuous    | Inhaled desflurane concentration (volume percent)                               |
| DESOUT                | Continuous    | Exhaled desflurane concentration (volume percent)                               |
| ISOIN                 | Continuous    | Inhaled isoflurane concentration (volume percent)                               |
| ISOOOUT               | Continuous    | Exhaled isoflurane concentration (volume percent)                               |
| N2OIN                 | Continuous    | Inhaled nitrous oxide concentration (volume percent)                            |
| N2OOUT                | Continuous    | Exhaled nitrous oxide concentration (volume percent)                            |
| SEVOIN                | Continuous    | Inhaled sevoflurane concentration (volume percent)                              |
| SEVOOUT               | Continuous    | Exhaled sevoflurane concentration (volume percent)                              |
| TOTALMAC              | Continuous    | End-tidal anesthetic concentration (MAC [minimum alveolar concentration] units) |
| TOTALMACAGEADJ        | Continuous    | End-tidal anesthetic concentration (Age-adjusted MAC units)                     |
| BIS_INDEX             | Continuous    | Bispectral index                                                                |
| BIS_SR                | Continuous    | Suppression ratio (output from bispectral index monitor)                        |
| DIASTOLIC             | Continuous    | Diastolic blood pressure                                                        |
| SYSTOLIC              | Continuous    | Systolic blood pressure                                                         |
| BP_MEAN               | Continuous    | Mean arterial blood pressure                                                    |
| HR                    | Continuous    | Heart rate                                                                      |
| PULSE                 | Continuous    | Pulse                                                                           |
| TEMP                  | Continuous    | Temperature                                                                     |
| TEMP_CORE             | Continuous    | Temperature                                                                     |
| SPO2                  | Continuous    | Pulse Oximeter                                                                  |
| CO2                   | Continuous    | End-tidal carbon dioxide                                                        |
| RR                    | Continuous    | Respiratory Rate                                                                |
| PEEP                  | Continuous    | Positive End-Expiratory Pressure                                                |
| PIP                   | Continuous    | Positive Inspiratory Pressure                                                   |
| MV                    | Continuous    | Minvute Ventilation                                                             |
| CVP                   | Continuous    | Central Venous Pressure                                                         |
| URINE_OUTPUT          | Continuous    | Urine Output                                                                    |
| Est_Blood_Loss        | Continuous    | Estimated Blood Loss                                                            |
| TIDAL_VOLUME          | Continuous    | Tidal Volume                                                                    |
| GLU_ART               | Continuous    | Glucose value                                                                   |

|                  |                            |                                             |
|------------------|----------------------------|---------------------------------------------|
| GLU_VEN          | Continuous                 | Glucose value                               |
| HCT              | Continuous                 | Hematocrit                                  |
| INR              | Continuous                 | International normalized ratio              |
| Plateau pressure | Continuous                 | Plateau Pressure (airway)                   |
| PLATELET         | Continuous                 | Platelet Count                              |
| POTASSIUM        | Continuous                 | Potassium level                             |
| SECSURPPRESSED   | Continuous                 | Seconds of electroencephalogram suppression |
| DRUG_TYPE        | DRUGS                      | Types of medication                         |
|                  | DRUGS IMPORT               |                                             |
|                  | DRUGS IMPORT Allergies     |                                             |
|                  | DRUGS REMOVED FROM SERVICE |                                             |
|                  | DRUGS-ANTIBIOTICS          |                                             |
|                  | DRUGS-ANTIEMETICS          |                                             |
|                  | DRUGS-Beta blockers        |                                             |
|                  | DRUGS-CARDIACS             |                                             |
|                  | DRUGS-HYPNOTICS            |                                             |
|                  | DRUGS-LOCAL ANESTHESIA     |                                             |
|                  | DRUGS-NARCOTICS            |                                             |
|                  | DRUGS-OTHER                |                                             |
|                  | DRUGS-OTHER A-E            |                                             |
|                  | DRUGS-OTHER F-J            |                                             |
|                  | DRUGS-OTHER K-O            |                                             |
|                  | DRUGS-OTHER P-T            |                                             |
|                  | DRUGS-OTHER U-Z            |                                             |
|                  | DRUGS-OXYTOCICS            |                                             |
|                  | DRUGS-RELAXANTS            |                                             |
|                  | DRUGS-REVERSALS            |                                             |
|                  | DRUGS-TIMERS               |                                             |
|                  | FLUIDS                     |                                             |
| DRUGS            | See below                  |                                             |
| DRUG_AMT         | Continuous                 |                                             |
| DRUG_MINUTES     | Continuous                 |                                             |

| <b>Parameter</b> | <b>Drug</b>             | <b>Drug Type</b>    |
|------------------|-------------------------|---------------------|
|                  | 68 Morphine             | DRUGS-NARCOTICS     |
|                  | 69 FentaNYL             | DRUGS-NARCOTICS     |
|                  | 74 Midazolam            | DRUGS-HYPNOTICS     |
|                  | 76 Propofol             | DRUGS-HYPNOTICS     |
|                  | 81 Succinylcholine      | DRUGS-RELAXANTS     |
|                  | 83 Pancuronium          | DRUGS-RELAXANTS     |
|                  | 84 Vecuronium           | DRUGS-RELAXANTS     |
|                  | 85 Rocuronium           | DRUGS-RELAXANTS     |
|                  | 86 Atropine             | DRUGS-CARDIACS      |
|                  | 87 Neostigmine          | DRUGS-REVERSALS     |
|                  | 88 Naloxone             | DRUGS-REVERSALS     |
|                  | 89 Flumazenil           | DRUGS-REVERSALS     |
|                  | 100 DOPamine            | DRUGS-CARDIACS      |
|                  | 101 EPHEDrine           | DRUGS-CARDIACS      |
|                  | 102 Esmolol             | DRUGS-Beta blockers |
|                  | 103 HydrALAZINE         | DRUGS-CARDIACS      |
|                  | 105 Labetalol           | DRUGS-Beta blockers |
|                  | 108 Nitroglycerin       | DRUGS-CARDIACS      |
|                  | 110 Norepinephrine      | DRUGS-CARDIACS      |
|                  | 112 Phenylephrine       | DRUGS-CARDIACS      |
|                  | 195 Vasopressin         | DRUGS-CARDIACS      |
|                  | 200 Dexamethasone       | DRUGS-OTHER         |
|                  | 203 Hydrocortisone      | DRUGS-OTHER         |
|                  | 207 MethylPREDNISolone  | DRUGS-OTHER         |
|                  | 218 Lactated Ringers    | FLUIDS              |
|                  | 220 Normal Saline       | FLUIDS              |
|                  | 226 Mannitol 20%        | FLUIDS              |
|                  | 232 Packed RBC          | BLOOD PRODUCTS      |
|                  | 234 Platelets           | BLOOD PRODUCTS      |
|                  | 235 Fresh frozen plasma | BLOOD PRODUCTS      |
|                  | 236 Cryoprecipitate     | BLOOD PRODUCTS      |
|                  | 237 Albumin 5%          | BLOOD PRODUCTS      |
|                  | 238 Albumin 25%         | BLOOD PRODUCTS      |

|                               |                        |
|-------------------------------|------------------------|
| 573 Other fluid               | FLUIDS                 |
| 766 Cisatracurium             | DRUGS-RELAXANTS        |
| 780 Ondansetron               | DRUGS-ANTIEMETICS      |
| 968 Glycopyrrolate            | DRUGS-CARDIACS         |
| 1023 Chloroprocaine 3%        | DRUGS-LOCAL ANESTHESIA |
| 1121 Ketamine                 | DRUGS-HYPNOTICS        |
| 1198 Metoprolol               | DRUGS-Beta blockers    |
| 1204 HYDROMORPHONE            | DRUGS-NARCOTICS        |
| 1205 Meperidine hydrochloride | DRUGS-NARCOTICS        |
| 1444 1/2 Normal saline        | FLUIDS                 |
| 1446 D10-W                    | FLUIDS                 |
| 1450 D5 Ringers Lactate       | FLUIDS                 |
| 1451 D5-1/2 Normal Saline     | FLUIDS                 |
| 1452 D5-1/4 Normal Saline     | FLUIDS                 |
| 1455 D5-Normal Saline         | FLUIDS                 |
| 1456 NaHCO3 150mEq in D5W     | FLUIDS                 |
| 1457 D5-W                     | FLUIDS                 |
| 1458 D50                      | FLUIDS                 |
| 1461 Hextend                  | FLUIDS                 |
| 1670 Albuterol MDI            | DRUGS-OTHER            |
| 1671 Albuterol Neb 0.5%       | DRUGS-OTHER            |
| 1794 Diphenhydramine          | DRUGS-OTHER            |
| 1846 Glucagon                 | DRUGS-OTHER            |
| 1950 EPINEPHRINE              | DRUGS-CARDIACS         |
| 1951 Mannitol 25%             | FLUIDS                 |
| 1961 Dexmedetomidine          | DRUGS-OTHER            |
| 1968 Hyperal                  | FLUIDS                 |
| 2071 Packed RBC (ml)          | BLOOD PRODUCTS         |
| 2073 Platelets (ml)           | BLOOD PRODUCTS         |
| 2074 FFP (ml)                 | BLOOD PRODUCTS         |
| 2989 Atracurium               | DRUGS-RELAXANTS        |
| 3057 Hespan                   | FLUIDS                 |
| 3387 NaHCO3 150mEq in Water   | FLUIDS                 |
| 3460 Phenylephrine SA         | DRUGS-LOCAL ANESTHESIA |

|                                           |                        |
|-------------------------------------------|------------------------|
| 3489 FentaNYL SA                          | DRUGS-LOCAL ANESTHESIA |
| 9097 D5-1/2 Normal Saline 20K             | FLUIDS                 |
| 10291 OxyCODONE/Acetaminophen 5/325 (     | DRUGS-NARCOTICS        |
| 10297 OxyCODONE CR (for OxyCONTIN)        | DRUGS-NARCOTICS        |
| 10298 EPINEPHrine inh 2.25%               | DRUGS-CARDIACS         |
| 10585 Albuterol Neb 2.5mg                 | DRUGS-OTHER            |
| 10647 Racepinephrine Neb 2.25%            | DRUGS-OTHER P-T        |
| 10648 D5-Normal Saline 20 KCL             | FLUIDS                 |
| 10652 Ketorolac Tromethamine (for Toradol | DRUGS-OTHER K-O        |
| 10665 OxyCODONE IR                        | DRUGS-NARCOTICS        |
| 10667 Morphine Sulfate 1mg/ml PCA         | DRUGS-NARCOTICS        |
| 10672 HYDROmorphone 0.5mg/ml PCA          | DRUGS-NARCOTICS        |
| 10689 Propofol (ml)                       | DRUGS-HYPNOTICS        |
| 10821 1/2 Normal Saline 20 KCL            | FLUIDS                 |
| 10910 Voluven                             | FLUIDS                 |
| 11292 Normal Saline 20 KCL                | FLUIDS                 |
| 11951 Racepinephrine Neb 2.25% (ml)       | DRUGS-OTHER P-T        |
| 14162 Ropivacaine 0.2% w/HYDROmorphon     | DRUGS-LOCAL ANESTHESIA |
| 14163 Ropivacaine 0.2% w/HYDROmorphon     | DRUGS-LOCAL ANESTHESIA |
| 14166 Ropivacaine 0.125% w/HYDROmorph     | DRUGS-LOCAL ANESTHESIA |
| 14325 Recomb Factor VII (ml)              | BLOOD PRODUCTS         |
| 14796 Albuterol Neb                       | DRUGS-OTHER            |
