# Supplementary material for: Using machine learning techniques to develop forecasting algorithms for postoperative complications: protocol for a retrospective study
Source: PubMed Central journal article supplement — BMJ Open. 2018 Apr 10;8(4):e020124. doi: 10.1136/bmjopen-2017-020124 (PMC5898287; doi:10.1136/bmjopen-2017-020124), 2018-04-10
Supplement: bmjopen-2017-020124supp003.pdf [file bmjopen-2017-020124supp003.pdf]

|             |                                                                                                                                   |
|-------------|-----------------------------------------------------------------------------------------------------------------------------------|
| SurveyHea   | 0 Reported No Heart Attack on Survey<br>1 Reported Heart Attack on Survey<br>3 Prefer not to answer                               |
| SurveyCard  | 0 Reported No Cardiac Arrest on Survey<br>1 Reported Cardiac Arrest on Survey<br>3 Prefer not to answer                           |
| SurveyHea   | 0 Reported No Heart Failure on Survey<br>1 Reported Heart Failure on Survey<br>3 Prefer not to answer                             |
| SurveyStro  | 0 Reported No Stroke on Survey<br>1 Reported Stroke on Survey<br>3 Prefer not to answer                                           |
| SurveyBloo  | 0 Reported No Leg Blood Clot on Survey<br>1 Reported Leg Blood Clot on Survey<br>3 Prefer not to answer                           |
| SurveyBloo  | 0 Reported No Lung Blood Clot on Survey<br>1 Reported Lung Blood Clot on Survey<br>3 Prefer not to answer                         |
| SurveyWou   | 0 Reported No Wound Infection on Survey<br>1 Reported Wound Infection on Survey<br>3 Prefer not to answer                         |
| SurveyResp  | 0 Reported No Respiratory Failure on Survey<br>1 Reported Respiratory Failure on Survey<br>3 Prefer not to answer                 |
| SurveyPnei  | 0 Reported No Pneumonia on Survey<br>1 Reported Pneumonia on Survey<br>3 Prefer not to answer                                     |
| SurveyNerv  | 0 Reported No Nerve Injury on Survey<br>1 Reported Nerve Injury on Survey<br>3 Prefer not to answer                               |
| SurveyGIBl  | 0 Reported No GI Bleed on Survey<br>1 Reported GI Bleed on Survey<br>3 Prefer not to answer                                       |
| SurveyUlce  | 0 Reported No Ulcer on Survey<br>1 Reported Ulcer on Survey<br>3 Prefer not to answer                                             |
| SurveyDelir | 0 Reported No Delerium on Survey<br>1 Reported Delerium on Survey<br>3 Prefer not to answer                                       |
| 30d_Survey  | 0 Reported No Readdmission within 30 days on Survey<br>1 Reported Readdmission within 30 days on Survey<br>3 Prefer not to answer |
| 1y_Survey_  | 0 Reported No Readdmission within 1 year on Survey<br>1 Reported Readdmission within 1 year on Survey<br>3 Prefer not to answer   |
