# Supplementary material for: Using machine learning techniques to develop forecasting algorithms for postoperative complications: protocol for a retrospective study
Source: PubMed Central journal article supplement — BMJ Open. 2018 Apr 10;8(4):e020124. doi: 10.1136/bmjopen-2017-020124 (PMC5898287; doi:10.1136/bmjopen-2017-020124), 2018-04-10
Supplement: bmjopen-2017-020124supp004.pdf [file bmjopen-2017-020124supp004.pdf]

| <b>Info_Type</b> | <b>SubField</b>            | <b>Output</b>              | <b>Description</b>                                        |                                     |
|------------------|----------------------------|----------------------------|-----------------------------------------------------------|-------------------------------------|
| ADT              | AdmitDtm                   | [DateTime]                 | Hospital Admit DateTime                                   |                                     |
|                  | DischargeDtm               | [DateTime]                 | Hospital Discharge DateTime                               |                                     |
|                  | ICU_Unit                   | 10400 ICU                  |                                                           | ICU Name - Neurosurgery ICU         |
|                  |                            | 4400 ICU                   |                                                           | ICU Name - Surgical/Burn/Trauma ICU |
|                  |                            | 5600 ICU                   |                                                           | ICU Name - Cardiothoracic ICU       |
|                  |                            | 8200 ICU                   |                                                           | ICU Name - Cardiac ICU              |
|                  |                            | 83 CTICU                   |                                                           | ICU Name - Cardiothoracic ICU       |
|                  | ICU_InDtm                  | [DateTime]                 | ICU Admit DateTime                                        |                                     |
| ICU_OutDtm       | [DateTime]                 | ICU Discharge DateTime     |                                                           |                                     |
| Diagnoses        | Value                      | [Text]                     | Diagnoses related to delirium/encephalopathy              |                                     |
| Readmissions     | DischargeDX                | [Text]                     | Discharge Diagnosis                                       |                                     |
|                  | Re_Adm_IDCode              | [Continuous]               | Medical record number for readmission                     |                                     |
|                  | Re_adm_VisitIDCode         | [Continuous]               | Patient account number (registration) for readmission     |                                     |
|                  | Re_Adm_Location            | [Text]                     | Bed assignment for readmission                            |                                     |
|                  | Re_Adm_AdmitDtm            | [DateTime]                 | DateTime of Readmission                                   |                                     |
|                  | Re_Adm_AdmitDx             | [Text]                     | Diagnosis for readmission                                 |                                     |
|                  | DurationBetweenVisits_Days | [Continuous]               | Duration (days) between initial discharge and readmission |                                     |
| Labs             | SignificantDtm             | [DateTime]                 | DateTime of Lab Test                                      |                                     |
|                  | Label                      | A-a Gradient               | Alveolar-Arterial Oxygen Gradient (mmHg)                  |                                     |
|                  |                            | Albumin Level              | Plasma albumin level (g/dL)                               |                                     |
|                  |                            | Alkaline Phosphatase Total | Plasma alkaline phosphatase level (units/L)               |                                     |
|                  |                            | ALT                        | Plasma alanine transaminase level (units/L)               |                                     |
|                  |                            | Anion Gap                  | Plasma anion gap (mmol/L)                                 |                                     |
|                  |                            | AST                        | Plasma aspartate transaminase level (units/L)             |                                     |

|                                 |                                                                          |
|---------------------------------|--------------------------------------------------------------------------|
| Basophil Absolute Automated     | Concentration of basophils in blood<br>(K/mm <sup>3</sup> )              |
| Basophil Percent Automated      | Percent of basophils in blood (%)                                        |
| Bilirubin Direct                | Plasma direct bilirubin level (mg/dL)                                    |
| Bilirubin Total                 | Plasma total bilirubin level (mg/dL)                                     |
| Calcium Total                   | Plasma calcium level (mg/dL)                                             |
| Chloride Level                  | Plasma chloride level (mmol/L)                                           |
| CO2 Total                       | Plasma bicarbonate level, measured<br>(mmol/L)                           |
| CO2, Total Calculated, Arterial | Plasma bicarbonate level, calculated from<br>arterial blood gas (mmol/L) |
| Creatinine Level                | Plasma creatinine level (mg/dL)                                          |
| Eosinophil Absolute Automated   | Concentration of eosinophils in blood<br>(K/mm <sup>3</sup> )            |
| Eosinophil Percent Automated    | Percent of eosinophils in blood (%)                                      |
| Glucose Level Fasting           | Plasma glucose level, fasting (mg/dL)                                    |
| Glucose Level Random            | Plasma glucose level (mg/dL)                                             |
| Glucose Ur Qual                 | Urine glucose, qualitative (negative, 1+, 2+,<br>3+)                     |
| Glucose WB f POC                | Plasma glucose level, point of care (mg/dL)                              |
| HCT                             | Hematocrit (%)                                                           |
| Hemoglobin A1c                  | Hemoglobin A1c (%)                                                       |
| HGB                             | Hemoglobin level (g/dL)                                                  |
| INR ePOC                        | International normalized ratio (no units)                                |
| Lymphocyte Absolute Automated   | Concentration of lymphocytes in blood<br>(K/mm <sup>3</sup> )            |
| Lymphocyte Percent Automated    | Percent of lymphocytes in blood (%)                                      |
| MCH                             | Mean corpuscular hemoglobin (pg)                                         |
| MCHC                            | Mean corpuscular hemoglobin<br>concentration (g/dL)                      |
| MCV                             | Mean corpuscular volume (fL)                                             |

|                                   |                                                                             |
|-----------------------------------|-----------------------------------------------------------------------------|
| Monocyte Absolute Automated       | Concentration of monocytes in blood<br>(K/mm <sup>3</sup> )                 |
| Monocyte Percent Automated        | Percent of monocytes in blood (%)                                           |
| MPV                               | Mean platelet volume (fL)                                                   |
| Neutrophil Absolute Automated     | Concentration of neutrophils in blood<br>(K/mm <sup>3</sup> )               |
| Neutrophil Percent Automated      | Percent of neutrophils in blood (%)                                         |
| NRBC Abs Auto                     | Concentration of nucleated red blood cells<br>in blood (K/mm <sup>3</sup> ) |
| NRBC Pct Auto                     | Percent of nucleated red blood cells in<br>blood (%)                        |
| pCO2 Art gPOC                     | Arterial Partial Pressure of Carbon Dioxide<br>(mmHg)                       |
| pCO2 Ven gPOC                     | Venous Partial Pressure of Carbon Dioxide<br>(mmHg)                         |
| pCO2, Arterial                    | Arterial Partial Pressure of Carbon Dioxide<br>(mmHg)                       |
| Percent Inspired Oxygen, Arterial | Percent Inspired Oxygen (%)                                                 |
| pH Art gPOC                       | Arterial pH (no units)                                                      |
| pH Arterial                       | Arterial pH (no units)                                                      |
| platelet cPOC                     | Concentration of platelets in blood (K/mm <sup>3</sup> )                    |
| Plt                               | Concentration of platelets in blood (K/mm <sup>3</sup> )                    |
| pO2 Art gPOC                      | Arterial Partial Pressure of Oxygen (mmHg)                                  |
| pO2 Ven gPOC                      | Venous Partial Pressure of Oxygen (mmHg)                                    |
| pO2, Arterial                     | Arterial Partial Pressure of Oxygen (mmHg)                                  |
| Potassium Level Plasma            | Plasma potassium level (mmol/L)                                             |
| Protein Level Plasma              | Plasma protein level (g/dL)                                                 |
| PT (Seconds)                      | Prothrombin time (sec)                                                      |
| PT ePOC                           | Prothrombin time (sec)                                                      |

| Medications             | Value        |                                                                                                                                                                                                                                                                                                                                                                                                                                                                                                                                                                      |                                                                                                                                                                                                                                                                                                                                                                                                                                                                                                                                                                     |
|-------------------------|--------------|----------------------------------------------------------------------------------------------------------------------------------------------------------------------------------------------------------------------------------------------------------------------------------------------------------------------------------------------------------------------------------------------------------------------------------------------------------------------------------------------------------------------------------------------------------------------|---------------------------------------------------------------------------------------------------------------------------------------------------------------------------------------------------------------------------------------------------------------------------------------------------------------------------------------------------------------------------------------------------------------------------------------------------------------------------------------------------------------------------------------------------------------------|
| SignificantDtm<br>Label | [Continuous] | PTT Activated<br><br>PTT Activated.<br><br>RBC<br>RDW CV<br>RDW SD<br>Sodium gPOC<br>Sodium iPOC<br>Sodium Level<br><br>Urea Nitrogen<br>Volume Inspired Oxygen Arterial<br><br>WBC<br>[Continuous]<br><br>[DateTime]<br>ALPRAZolam Tablet<br>Ampicillin/Sulbactam - CRITICAL<br>SHORTAGE<br>CeFAZolin IVPB<br>Cefepime IVPB - CRITICAL SHORTAGE<br>CefOXitin IVPB<br>CefTRIAxone IVPB<br>Clotrimazole Troche<br>Darunavir<br>Dexmedetomidine Infusion<br>DiazePAM Injection<br>DiphenhydrAMINE Oral<br>Eszopiclone<br>FentaNYL Bolus from CADD<br>FentaNYL Infusion | Partial thomboplastin time, activated (sec)<br><br>Partial thomboplastin time, activated (sec)<br>Concentration of red blood cells in blood<br>(M/mm <sup>3</sup> )<br>Red cell distribution width (%)<br>Red cell distribution width (fL)<br>Plasma sodium level (mmol/L)<br>Plasma sodium level (mmol/L)<br>Plasma sodium level (mmol/L)<br><br>Plasma urea nitrogen (BUN) level (mg/dL)<br>--<br>Concentration of white blood cells in blood<br>(K/mm <sup>3</sup> )<br>Value of lab test<br>DateTime medication order is placed in<br>electronic medical record |

FentaNYL Injection  
Fluconazole Tablet  
Haloperidol (immediate-acting) Lactate Injection  
HYDROmorphine Bolus from CADD  
HYDROmorphine Injection  
HYDROmorphine PCA  
Insulin Glargine for LANTUS  
Insulin Lispro for HumaLOG

Insulin Lispro-Sliding Scale for HumaLOG  
Insulin NPH for HumuLIN-N  
Insulin Regular for HumuLIN-R  
Insulin Regular Infusion  
LORazepam Injection  
LORazepam Tablet  
Maraviroc  
Metoclopramide Injection  
Micafungin IVPB  
Midazolam Infusion  
Midazolam Injection  
Morphine Injection  
Nystatin Liquid  
Ondansetron Injection  
Oxacillin IVPB  
OxyCODONE Liquid

OxyCODONE Tablet Immediate-Release

OxyCODONE/Acetaminophen 5/325 mg  
Piperacillin/Tazobactam  
QUetiapine Tablet  
Raltegravir  
Ramelteon

Ritonavir Tablet  
 Trimethobenzamide Injection

|               |               |                                                         |
|---------------|---------------|---------------------------------------------------------|
| DosageLow     | [Continuous]  | Medication dose (low end of range, if applicable)       |
| DosageHigh    | [Continuous]  | Medication dose (high end of range)                     |
| UOM           | [Categorical] | Unit of measure for dosage                              |
| FrequencyCode | [Categorical] | Frequency of medication order                           |
| Duration_Days | [Continuous]  | Number of days during which medication order was active |

Clinical Documentation

- 01. Vital Signs

|                                     |                                                 |                                        |
|-------------------------------------|-------------------------------------------------|----------------------------------------|
| SignificantDtm                      | [DateTime]                                      | DateTime of vital sign record          |
| Intensity                           | [Continuous]                                    | Numeric rating scale (0-10) pain score |
| Behaviors                           | Calm<br>Agitated                                |                                        |
| Tool Used                           | 0-10 Scale<br>Faces<br>Non Communicative        |                                        |
| Patient Goal                        | [Continuous]                                    | Patient's target pain score            |
| Location                            | [Categorical]                                   | Location of pain                       |
| Pain Management                     | [Categorical]                                   | Nurse response to current pain score   |
| Effectiveness of Pain Interventions | Obtaining relief<br>Partial relief<br>No relief |                                        |

Clinical Documentation

- 03. Assessment/IPOC

|                                              |                     |                                      |
|----------------------------------------------|---------------------|--------------------------------------|
| SignificantDtm                               | [DateTime]          | DateTime of CAM-ICU Assessment       |
| CAM-ICU Overall Score                        | [Negative/Positive] | CAM-ICU Result (delirium assessment) |
| Feature 1: Acute Onset or Fluctuating Course | [Negative/Positive] | Feature 1 of CAM-ICU                 |
| Feature 2: Inattention                       | [Negative/Positive] | Feature 2 of CAM-ICU                 |
| Feature 3: Altered Level of Consciousness    | [Negative/Positive] | Feature 3 of CAM-ICU                 |

|                             |                                                  |                              |                                                                                     |
|-----------------------------|--------------------------------------------------|------------------------------|-------------------------------------------------------------------------------------|
|                             | Feature 4: Disorganized Thinking                 | [Negative/Positive]          | Feature 4 of CAM-ICU                                                                |
|                             | RASS: If -4 or -5, STOP Reassess later           | [Categorical]                | Indicates whether CAM-ICU is contraindicated (e.g., because patient is too sedated) |
| Clinical Documentation      |                                                  |                              |                                                                                     |
| - Fall Event Note           | SignificantDtm                                   | [DateTime]                   |                                                                                     |
|                             | Fall Date/Time                                   | [DateTime]                   | DateTime of Fall                                                                    |
|                             | Injury                                           | [Yes/No]                     | Indicates whether fall resulted in patient injury                                   |
|                             | Injury Details                                   | [Text]                       | Description of injury                                                               |
| Clinical Documentation      |                                                  |                              |                                                                                     |
| - Neuro Flowsheet           | SignificantDtm                                   | [DateTime]                   | DateTime of RASS Assessment                                                         |
|                             | Behaviors                                        | Calm<br>Agitated<br>Restless |                                                                                     |
|                             | RASS Score Numeric                               | [Continuous]                 | Richmond Agitation Sedation Scale score (-4 to 4)                                   |
|                             | RASS Sedation Scale                              | [Categorical]                | Verbal description of RASS numeric score                                            |
| Clinical Documentation      |                                                  |                              |                                                                                     |
| - Intubation Procedure Note | SignificantDtm                                   | [DateTime]                   | DateTime of Intubation Note                                                         |
|                             | Intubation Type                                  | [Emergent/Elective]          |                                                                                     |
|                             | Paralytics Given                                 | [Yes/No]                     |                                                                                     |
|                             | Procedure Date/Time                              | [DateTime]                   | DateTime of Intubation                                                              |
|                             | Sedation Given                                   | [Yes/No]                     |                                                                                     |
| Clinical Documentation      |                                                  |                              |                                                                                     |
| - Patient Profile           | SignificantDtm                                   | [DateTime]                   | DateTime of assessment                                                              |
|                             | Does patient currently have a tracheostomy tube? | [Yes/No]                     |                                                                                     |

Does patient have a history of laryngectomy? [Yes/No]

Clinical Documentation

- Ventilator Flowsheet SignificantDtm

[DateTime]

DateTime of ventilator event

Modes/Bagged

A/C - VC

Assist control - volume control (AC-VC)

A/C - VC+

Assist control - volume control + (AC-VC+)

A/C - PC

Assist control - pressure control (AC-PC)

BiPAP

Bilevel positive airway pressure (BiPAP)

Continuous Positive Airway Pressure

Continuous positive airway pressure (CPAP)

SIMV - VC

Synchronized intermittent mandatory ventilation (SIMV)

SIMV-PC

Synchronized intermittent mandatory ventilation (SIMV)

SIMV-VC

Synchronized intermittent mandatory ventilation (SIMV)

SPONT-VC

Pressure support (PSV)

Synchronized intermittent mandatory ventilation

Synchronized intermittent mandatory ventilation (SIMV)

Ventilator Pulmonary Event

Extubation

Re-intubation

Ventilator start

Start of mechanical ventilation

Ventilator stop

End of mechanical ventilation

Weaning end

Weaning start
